# Supplementary material for: Copper-catalyzed 1,2,2-trifunctionalization of maleimides with 1,7-enynes and oxime esters via radical relay/1,5-hydrogen-atom transfer
Source: Royal Society of Chemistry journal article supplement (doi:10.1039/d3qo01431b), 2023-01-01
Supplement: d3qo01431b1.pdf [file d3qo01431b1.pdf]

# Supporting Information

## Copper-Catalyzed 1,2,2- Trifunctionalization of Maleimides with 1,7- Enynes and Oxime Esters *via* Radical Relay/1,5-Hydrogen-atom Transfer

Li-Lin Jiang,<sup>a</sup> Hui Qiu,<sup>a</sup> Yu Zhou,<sup>a</sup> Ling-Tao Wang,<sup>a</sup> Wen-Hui Yang,<sup>a</sup> Chao Deng,<sup>\*b</sup>  
and Wen-Ting Wei<sup>\*a</sup>

<sup>a</sup> School of Materials Science and Chemical Engineering, Ningbo University, 315211,  
China.

E-mail: weiwenting@nbu.edu.cn.

<sup>b</sup> Jiangsu Key Laboratory of Pesticide Science and Department of Chemistry, College  
of Sciences, Nanjing Agricultural University, 210095, China.

E-mail: chaodeng@njau.edu.cn.

### List of Contents

|                                                                 |        |
|-----------------------------------------------------------------|--------|
| (A) General information                                         | S2     |
| (B) Typical experimental procedures                             | S2-3   |
| (C) Analytical data                                             | S3-23  |
| (D) Density functional theory calculations                      | S24-46 |
| (E) References                                                  | S47-48 |
| (F) Spectra                                                     | S49-81 |
| (G) The X-ray single-crystal diffraction analysis of product 4h | S82-87 |

## (A) General information

All chemicals were acquired from commercial sources and were employed as received unless otherwise mentioned. 1,7-Enynes<sup>1</sup> and oxime esters<sup>2</sup> were synthesized according to relevant literature reports. The reaction was monitored by TLC with silica gel plates, and the visualization was displayed under UV light (254 nm). <sup>1</sup>H NMR, <sup>13</sup>C NMR, and <sup>19</sup>F NMR spectra were recorded on a Bruker 400 (400, 101, and 376 MHz) or 500 (500, 126, and 471 MHz) advance spectrometer at room temperature in CDCl<sub>3</sub> (solvent signals,  $\delta$  7.26 and 77.0 ppm) or DMSO-d<sub>6</sub> (solvent signals,  $\delta$  3.35 and 39.5 ppm) using TMS as internal standard. HRMS spectra were measured on an electrospray ionization quadrupole time-of-flight (ESI-Q-TOF) mass spectrometer.

## (B) Typical experimental procedures for the synthesis of compounds 4

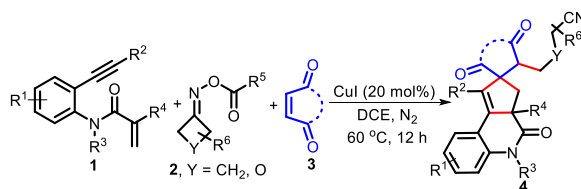

To a Schlenk tube were added 1,7-enynes **1** (0.2 mmol), oxime esters **2** (1.5 equiv), maleimides **3** (1.5 equiv), CuI (20 mol%), and 1,2-dichloroethane (DCE) (1.0 mL). Then the tube was stirred at 60 °C under N<sub>2</sub> atmosphere, and until complete consumption of starting material as monitored by TLC and/or GC-MS analysis. After the reaction was completed, the crude mixture was washed three times with saturated NaHCO<sub>3</sub> solution and then extracted three times with EtOAc. The organic layer was dried over Na<sub>2</sub>SO<sub>4</sub>, filtration and evaporation of the solvent. And the resulting residue

was purified by column chromatography on silica gel (petroleum ether/ethyl acetate = 2:1 or 3:1) to acquire the desired products **4**.

**(C) Analytical data**

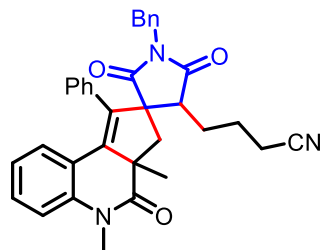

**4-(1'-Benzyl-3a,5-dimethyl-2',4,5'-trioxo-1-phenyl-**

**3,3a,4,5-tetrahydrospiro[cyclopenta[c]quinoline-2,3'-pyrrolidin]-4'-yl)butanenitrile (**4a**).** The product was

purified by silica gel column chromatography with petroleum ether/ethyl acetate (2:1, v/v). Yellow oil (84.7 mg, 80% yield, d.r. = 2:1); <sup>1</sup>H NMR (400 MHz, CDCl<sub>3</sub>) δ: 7.29 (t, *J* = 3.2 Hz, 3H), 7.20-7.16 (m, 3H), 7.13-7.08 (m, 2H), 7.03-6.92 (m, 3H), 6.76-6.69 (m, 3H), 4.74-4.53 (m, 2H), 3.36 (d, *J* = 4.4 Hz, 3H), 2.88-2.81 (m, 1H), 2.59-2.41 (m, 1H), 2.39-2.25 (m, 1H), 2.21-2.10 (m, 2H), 1.95-1.72 (m, 2H), 1.61-1.52 (m, 2H), 1.43 (s, 2H), 1.30 (s, 1H); <sup>13</sup>C NMR (101 MHz, CDCl<sub>3</sub>) δ: 180.2, 178.5, 177.3, 177.2, 174.6, 173.6, 140.0, 139.5, 138.2, 136.8, 135.4, 135.2, 133.7, 133.3, 129.3 (2), 129.1, 128.9, 128.7, 128.6, 128.5, 128.4, 128.3, 128.1 (2), 127.7, 127.1, 122.6, 122.5, 120.2, 120.1, 118.9, 118.8, 115.1, 115.0, 63.8, 63.1, 53.5, 53.1, 46.5, 45.0, 42.8, 42.4, 39.0, 36.9, 30.1, 27.9, 26.9, 26.0, 25.3, 23.4, 22.5, 16.9; HRMS *m/z* (ESI) calcd for C<sub>34</sub>H<sub>31</sub>N<sub>3</sub>NaO<sub>3</sub> ([M+Na]<sup>+</sup>) 552.2258, found 552.2250.

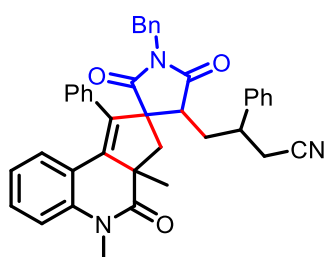

**4-(1'-Benzyl-3a,5-dimethyl-2',4,5'-trioxo-1-phenyl-**

**3,3a,4,5-tetrahydrospiro[cyclopenta[c]quinoline-2,3'-pyrrolidin]-4'-yl)-3-phenylbutanenitrile (**4b**).** The

product was purified by silica gel column chromatography with petroleum ether/ethyl acetate (2:1, v/v). Yellow oil (94.4 mg, 78% yield, d.r. = 5:1); <sup>1</sup>H NMR (400 MHz, CDCl<sub>3</sub>) δ: 7.74-7.72 (m, 1H), 7.56-7.53 (m, 1H), 7.37-7.30

(m, 5H), 7.24-7.20 (m, 2H), 7.17-7.13 (m, 3H), 7.07-7.01 (m, 3H), 6.96-6.90 (m, 2H), 6.75-6.68 (m, 2H), 4.73 (d,  $J = 17.6$  Hz, 1H), 4.62 (d,  $J = 14.0$  Hz, 1H), 3.52-3.39 (m, 4H), 2.91-2.87 (m, 1H), 2.55-2.50 (m, 2H), 2.46-2.34 (m, 2H), 2.09-2.05 (m, 2H), 1.50 (s, 0.5H), 1.46 (s, 2.5H);  $^{13}\text{C}$  NMR (101 MHz,  $\text{CDCl}_3$ )  $\delta$ : 180.0, 179.8, 177.7, 177.5, 175.3, 174.7, 140.0, 139.9, 136.2, 135.4, 133.1, 131.9, 131.1, 129.3, 129.2, 129.1, 129.0, 128.8, 128.7, 128.5, 128.4, 128.1, 128.0, 127.9, 127.8, 127.7, 127.4, 127.2 (2), 122.6 (2), 120.3, 118.3, 118.0, 115.1, 115.0, 63.3, 53.7, 53.4, 52.6, 42.7, 42.5, 39.6, 39.2, 33.6, 32.8, 30.1 (2), 29.7, 29.3, 26.2, 26.0, 25.1; HRMS  $m/z$  (ESI) calcd for  $\text{C}_{40}\text{H}_{35}\text{N}_3\text{NaO}_3$  ( $[\text{M}+\text{Na}]^+$ ) 628.2571, found 628.2561.

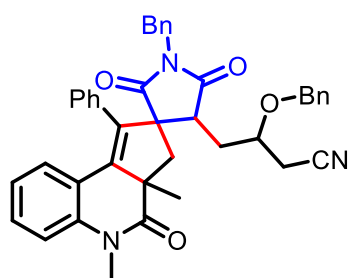

**4-(1'-Benzyl-3a,5-dimethyl-2',4,5'-trioxo-1-phenyl-3,3a,4,5-tetrahydrospiro[cyclopenta[c]quinoline-2,3'-pyrrolidin]-4'-yl)-3-(benzyloxy)butanenitrile (4c).** The product was purified by silica gel column

chromatography with petroleum ether/ethyl acetate (2:1, v/v). Yellow oil (64.8 mg, 51% yield, d.r. > 20:1);  $^1\text{H}$  NMR (400 MHz,  $\text{CDCl}_3$ )  $\delta$ : 7.38-7.30 (m, 6H), 7.25-7.14 (m, 5H), 7.10-7.03 (m, 3H), 6.95-6.92 (m, 1H), 6.90-6.86 (m, 2H), 6.76-6.73 (m, 2H), 4.73-4.68 (m, 1H), 4.62-4.59 (m, 1H), 4.47 (d,  $J = 11.6$  Hz, 1H), 4.31 (d,  $J = 11.2$  Hz, 1H), 3.42 (s, 3H), 2.99-2.95 (m, 1H), 2.83 (d,  $J = 14.4$  Hz, 1H), 2.57-2.47 (m, 2H), 2.08 (d,  $J = 14.4$  Hz, 2H), 1.84-1.77 (m, 2H), 1.49 (s, 3H);  $^{13}\text{C}$  NMR (101 MHz,  $\text{CDCl}_3$ )  $\delta$ : 180.1, 177.8, 174.6, 140.4, 140.0, 136.9, 136.1, 135.5, 133.7, 131.1, 129.3, 129.0, 128.9, 128.7 (2), 128.5, 128.3 (2), 128.0, 127.8, 122.5, 120.3, 117.0, 115.0, 72.3, 71.5, 63.5, 53.5, 42.6, 41.4, 39.5, 32.2, 26.2, 23.4; HRMS  $m/z$  (ESI) calcd for

C<sub>41</sub>H<sub>37</sub>N<sub>3</sub>NaO<sub>4</sub> ([M+Na]<sup>+</sup>) 658.2676, found 658.2670.

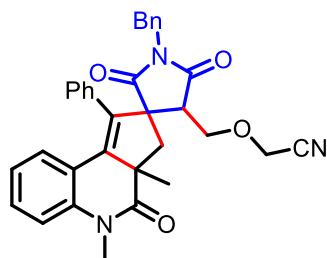

**2-((1'-Benzyl-3a,5-dimethyl-2',4,5'-trioxo-1-phenyl-3,3a,4,5-tetrahydrospiro[cyclopenta[c]quinoline-2,3'-pyrrolidin]-4'-yl)methoxy)acetonitrile (4d).** The product was purified by silica gel column chromatography with

petroleum ether/ethyl acetate (3:1, v/v). Yellow oil (79.7 mg, 75% yield, d.r. = 2:1);

<sup>1</sup>H NMR (400 MHz, CDCl<sub>3</sub>) δ: 7.39-7.35 (m, 4H), 7.23-7.21 (m, 2H), 7.20-7.15 (m, 2H), 7.06-7.02 (m, 3H), 6.75-6.69 (m, 3H), 4.83-4.69 (m, 1H), 4.66-4.62 (m, 1H), 4.22-4.15 (m, 2H), 3.94-3.91 (m, 2H), 3.43 (s, 3H), 2.95-2.87 (m, 1H), 2.45-2.34 (m, 1H), 2.18-2.05 (m, 1H), 1.56 (s, 2H), 1.38 (s, 1H); <sup>13</sup>C NMR (101 MHz, CDCl<sub>3</sub>) δ: 180.3, 179.8, 175.7, 175.4, 174.9, 173.7, 140.0, 139.9, 139.5, 137.5, 135.1, 135.0, 133.2, 131.1, 129.3, 129.2, 129.1, 129.0, 128.8, 128.7, 128.5, 128.4 (2), 128.3, 128.1, 128.0 (2), 127.5, 127.1, 122.5, 122.4, 120.3, 119.9, 115.0, 114.9, 68.9, 67.9, 61.9, 61.5, 56.4, 53.3, 52.9, 49.5, 47.8, 43.0, 42.6, 39.1, 37.4, 30.0, 29.2, 27.0, 26.1; HRMS *m/z* (ESI) calcd for C<sub>33</sub>H<sub>29</sub>N<sub>3</sub>NaO<sub>4</sub> ([M+Na]<sup>+</sup>) 554.2050, found 554.2039.

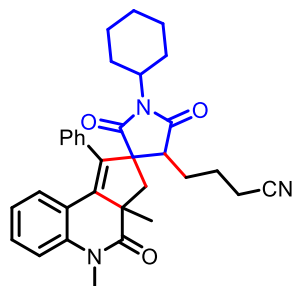

**4-(1'-Cyclohexyl-3a,5-dimethyl-2',4,5'-trioxo-1-phenyl-3,3a,4,5-tetrahydrospiro[cyclopenta[c]quinoline-2,3'-pyrrolidin]-4'-yl)butanenitrile (4e).** The product was purified by silica gel column chromatography with

petroleum ether/ethyl acetate (2:1, v/v). Colorless oil (78.2 mg, 75% yield, d.r. > 20:1);

<sup>1</sup>H NMR (400 MHz, CDCl<sub>3</sub>) δ: 7.37-7.31 (m, 4H), 7.06 (d, *J* = 8.0 Hz, 1H), 7.02-6.97 (m, 2H), 6.82-6.76 (m, 2H), 3.45 (s, 3H), 3.43-3.40 (m, 1H), 2.91 (t, *J* = 12.0 Hz, 1H),

2.54 (t,  $J = 6.8$  Hz, 1H), 2.31-2.22 (m, 2H), 2.11-2.07 (m, 1H), 1.88-1.81 (m, 4H), 1.71-1.60 (m, 6H), 1.51 (s, 3H), 1.29-1.24 (m, 4H);  $^{13}\text{C}$  NMR (101 MHz,  $\text{CDCl}_3$ )  $\delta$ : 180.6, 177.7, 174.7, 139.9, 136.9, 134.0, 129.4, 129.3 (2), 128.8, 128.5, 128.1, 122.6, 120.3, 119.1, 115.1, 63.0, 53.4, 51.9, 44.7, 39.1, 30.1, 29.0, 28.6, 26.1, 25.8, 25.7, 25.4, 25.0, 23.4, 17.0; HRMS  $m/z$  (ESI) calcd for  $\text{C}_{33}\text{H}_{35}\text{N}_3\text{NaO}_3$  ( $[\text{M}+\text{Na}]^+$ ) 544.2571, found 544.2561.

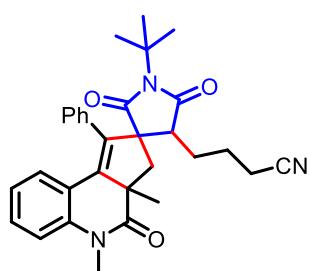

**4-(1-(*tert*-Butyl)-3a,5-dimethyl-2',4,5'-trioxo-1-phenyl-3,3a,4,5-tetrahydrospiro[cyclopenta[*c*]quinoline-2,3'-pyrrolidin]-4'-yl)butanenitrile (4f).** The product was

purified by silica gel column chromatography with petroleum ether/ethyl acetate (2:1, v/v). Yellow oil (72.3 mg, 73% yield, d.r. = 4:1);  $^1\text{H}$  NMR (400 MHz,  $\text{CDCl}_3$ )  $\delta$ : 7.41-7.31 (m, 4H), 7.09-7.01 (m, 3H), 6.83-6.72 (m, 2H), 3.45 (s, 3H), 3.41-3.39 (m, 1H), 2.92-2.85 (m, 1H), 2.51-2.47 (m, 1H), 2.28-2.16 (m, 2H), 1.96-1.66 (m, 4H), 1.60 (s, 9H), 1.26 (s, 0.6H), 1.20 (s, 2.4H);  $^{13}\text{C}$  NMR (101 MHz,  $\text{CDCl}_3$ )  $\delta$ : 181.3 (2), 178.8, 178.5, 174.7, 174.5, 139.9, 139.3, 138.0, 137.1, 134.1, 134.0, 129.3, 129.2, 129.1, 129.0, 128.7, 128.4, 128.1, 127.8, 127.4, 122.6, 122.4, 120.3, 119.1, 118.8, 115.0 (2), 63.5, 63.2, 58.6, 53.3, 52.6, 47.5, 45.1, 39.1, 36.6, 30.1, 30.0, 28.3, 28.2, 27.9, 26.5, 26.0, 25.2, 23.5, 22.1, 17.0; HRMS  $m/z$  (ESI) calcd for  $\text{C}_{31}\text{H}_{33}\text{N}_3\text{NaO}_3$  ( $[\text{M}+\text{Na}]^+$ ) 518.2414, found 518.2423.

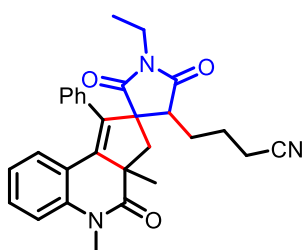

**4-(1-Ethyl-3a,5-dimethyl-2',4,5'-trioxo-1-phenyl-3,3a,4,5-tetrahydrospiro[cyclopenta[*c*]quinoline-2,3'-pyrrolidin]-4'-yl)butanenitrile (4g).** The product was

purified by silica gel column chromatography with petroleum ether/ethyl acetate (2:1, v/v). Yellow oil (72.9 mg, 78% yield, d.r. = 2:1);  $^1\text{H}$  NMR (400 MHz,  $\text{CDCl}_3$ )  $\delta$ : 7.37-7.28 (m, 4H), 7.08-7.00 (m, 3H), 6.81-6.74 (m, 2H), 3.68-3.50 (m, 2H), 3.45 (s, 2H), 3.43 (s, 1H), 3.27-3.19 (m, 1H), 3.01-2.90 (m, 1H), 2.61-2.49 (m, 1H), 2.28-2.25 (m, 1H), 2.15-2.09 (m, 1H), 1.89-1.73 (m, 2H), 1.71-1.56 (m, 2H), 1.52 (s, 2H), 1.39 (s, 1H), 1.20 (t,  $J = 7.2$  Hz, 3H);  $^{13}\text{C}$  NMR (101 MHz,  $\text{CDCl}_3$ )  $\delta$ : 180.3, 178.3, 177.5, 177.4, 174.6, 173.6, 140.0, 139.9, 139.8, 139.0, 138.7, 136.7, 134.0, 133.6, 129.3, 129.0 (2), 128.5, 128.0, 127.3, 122.6, 122.5, 120.2, 119.8, 119.0, 118.8, 115.1, 115.0, 63.5, 63.3, 53.4, 52.9, 47.1, 45.0, 39.0, 36.5, 34.0, 33.7, 30.1, 30.0, 28.6, 26.6, 26.1, 25.3, 23.5, 22.3, 16.9, 12.9, 12.0; HRMS  $m/z$  (ESI) calcd for  $\text{C}_{29}\text{H}_{29}\text{N}_3\text{NaO}_3$  ( $[\text{M}+\text{Na}]^+$ ) 490.2101, found 490.2109.

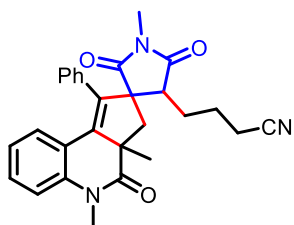

**4-(1',3a,5-Trimethyl-2',4,5'-trioxo-1-phenyl-3,3a,4,5-tetrahydrospiro[cyclopenta[c]quinoline-2,3'-pyrrolidin]-4'-yl)butanenitrile (4h).** The product was purified by silica

gel column chromatography with petroleum ether/ethyl acetate (2:1, v/v). Yellow soild (68.9 mg, 76% yield, d.r. = 4:1);  $^1\text{H}$  NMR (400 MHz,  $\text{CDCl}_3$ )  $\delta$ : 7.36-7.31 (m, 3H), 7.09-7.04 (m, 2H), 7.02-6.99 (m, 2H), 6.80-6.78 (m, 2H), 3.45 (s, 3H), 3.44-3.42 (m, 1H), 3.05 (s, 3H), 2.93-2.89 (m, 1H), 2.63-2.58 (m, 1H), 2.27-2.25 (m, 1H), 2.19-2.13 (m, 1H), 1.85-1.75 (m, 2H), 1.67-1.58 (m, 2H), 1.52 (s, 2.4H), 1.39 (s, 0.6H);  $^{13}\text{C}$  NMR (101 MHz,  $\text{CDCl}_3$ )  $\delta$ : 180.5, 179.3, 178.7, 177.6, 174.5, 173.6, 140.1, 139.9, 138.3, 136.6, 133.9, 133.4, 129.4, 128.9, 128.5, 128.0, 127.1, 122.6, 122.5, 120.1, 119.9, 119.0, 118.8, 115.1, 64.2, 63.5, 53.4, 53.0, 46.9, 45.1, 38.9, 36.4, 30.1, 28.1,

26.8, 26.1, 25.3 (2), 24.6, 23.4, 22.5, 16.9; HRMS  $m/z$  (ESI) calcd for  $C_{28}H_{27}N_3NaO_3$  ( $[M+Na]^+$ ) 476.1945, found 476.1938.

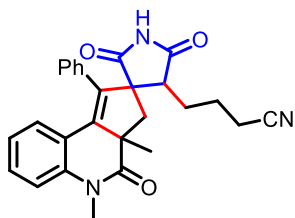

**4-(3a,5-Dimethyl-2',4,5'-trioxo-1-phenyl-3,3a,4,5-tetrahydrospiro[cyclopenta[c]quinoline-2,3'-pyrrolidin]-4'-yl)butanenitrile (4i).** The product was purified by silica

gel column chromatography with petroleum ether/ethyl acetate (2:1, v/v). Yellow oil (56.2 mg, 64% yield, d.r. = 2:1);  $^1H$  NMR (400 MHz,  $CDCl_3$ )  $\delta$ : 8.63 (s, 0.7H), 8.37 (s, 0.3H), 7.38-7.34 (m, 3H), 7.25-7.21 (m, 1H), 7.14-7.01 (m, 3H), 6.82-6.73 (m, 2H), 3.45 (s, 2H), 3.43 (s, 1H), 2.99-2.92 (m, 1.3H), 2.70 (t,  $J = 7.2$  Hz, 0.7H), 2.52-2.48 (m, 1H), 2.28-2.20 (m, 2H), 1.95-1.84 (m, 2H), 1.76-1.54 (m, 2H), 1.50 (s, 2H), 1.38 (s, 1H);  $^{13}C$  NMR (101 MHz,  $CDCl_3$ )  $\delta$ : 180.5, 178.8, 177.7, 177.6, 174.6, 173.6, 140.5, 139.9, 139.7, 137.7, 136.0, 133.9, 133.5, 129.4, 129.3, 129.1, 128.6 (2), 128.1, 127.1, 122.7, 122.6, 120.2, 120.1, 119.0, 118.9, 115.1 (2), 65.4, 64.8, 53.5, 53.1, 47.4, 46.0, 39.1, 36.9, 30.2, 30.1, 27.4, 26.9, 26.0, 24.8, 23.4, 22.8, 17.1, 16.9; HRMS  $m/z$  (ESI) calcd for  $C_{27}H_{25}N_3NaO_3$  ( $[M+Na]^+$ ) 462.1788, found 462.1780.

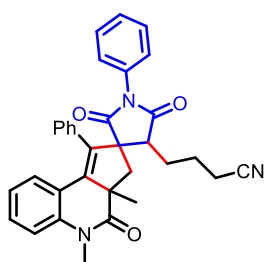

**4-(3a,5-Dimethyl-2',4,5'-trioxo-1,1'-diphenyl-3,3a,4,5-tetrahydrospiro[cyclopenta[c]quinoline-2,3'-pyrrolidin]-4'-yl)butanenitrile (4j).** The product was purified by silica gel column chromatography with petroleum ether/ethyl

acetate (2:1, v/v). Yellow oil (63.9 mg, 62% yield, d.r. = 6.5:1);  $^1H$  NMR (400 MHz,  $CDCl_3$ )  $\delta$ : 7.43 (t,  $J = 8.0$  Hz, 2H), 7.35 (d,  $J = 7.2$  Hz, 1H), 7.33-7.31 (m, 3H), 7.22-7.16 (m, 4H), 7.11-7.04 (m, 2H), 6.69 (t,  $J = 18.0$  Hz, 2H), 3.39 (s, 2.6H), 3.36 (s,



0.4H), 2.96 (d,  $J = 14.4$  Hz, 1H), 2.73 (t,  $J = 7.2$  Hz, 1H), 2.30-2.25 (m, 1H), 2.24-2.17 (m, 2H), 1.92-1.74 (m, 2H), 1.71-1.57 (m, 2H), 1.47 (s, 2.6H), 1.37 (s, 0.4H);  $^{13}\text{C}$  NMR (101 MHz,  $\text{CDCl}_3$ )  $\delta$ : 179.4, 177.6, 176.5, 174.6, 173.9, 140.5, 140.0, 139.9, 139.3, 136.5, 134.0, 133.7, 131.8, 131.3, 129.5 (2), 129.3, 129.2, 129.1, 128.9, 128.7, 128.6, 128.1, 126.4, 126.2, 122.7, 122.6, 120.2, 119.0, 118.8, 115.1, 64.0, 63.7, 53.6, 53.0, 47.7, 45.4, 39.1, 36.6, 30.1, 29.3, 26.6, 26.2, 25.6, 23.5, 22.6, 17.0, 14.1; HRMS  $m/z$  (ESI) calcd for  $\text{C}_{33}\text{H}_{29}\text{N}_3\text{NaO}_3$  ( $[\text{M}+\text{Na}]^+$ ) 538.2101, found 538.2108.

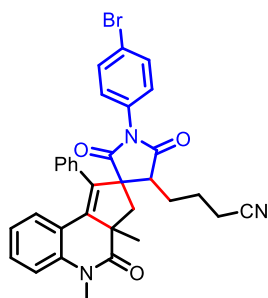

**4-(1'-(4-Bromophenyl)-3a,5-dimethyl-2',4,5'-trioxo-1-phenyl-3,3a,4,5-tetrahydrospiro[cyclopenta[c]quinoline-2,3'-pyrrolidin]-4'-yl)butanenitrile (4k).** The product was purified by silica gel column chromatography with petroleum

ether/ethyl acetate (2:1, v/v). Yellow oil (75.9 mg, 64% yield, d.r. = 5:1);  $^1\text{H}$  NMR (400 MHz,  $\text{CDCl}_3$ )  $\delta$ : 7.64-7.59 (m, 2H), 7.39-7.36 (m, 4H), 7.21-7.17 (m, 2H), 7.11-7.06 (m, 3H), 6.81-6.79 (m, 2H), 3.46 (s, 3H), 3.44-3.42 (m, 1H), 3.04-3.00 (m, 1H), 2.80 (t,  $J = 7.2$  Hz, 1H), 2.30-2.26 (m, 2H), 1.94-1.83 (m, 2H), 1.68-1.61 (m, 2H), 1.53 (s, 2.5H), 1.43 (s, 0.5H);  $^{13}\text{C}$  NMR (101 MHz,  $\text{CDCl}_3$ )  $\delta$ : 179.1, 178.6, 176.3, 176.1, 174.4, 173.4, 140.6, 140.0, 139.9, 139.4, 138.3, 136.2, 133.8, 133.6, 132.3, 132.1, 130.7, 129.7, 129.5, 129.3, 129.0, 128.7, 128.0, 127.9, 127.7 (2), 127.4, 122.7, 122.5, 120.0, 119.5, 118.9, 118.7, 115.1, 64.0, 63.8, 53.5, 52.9, 47.7, 45.4, 39.0, 30.1, 30.0, 26.6, 26.2, 25.5, 23.4, 22.2, 17.0; HRMS  $m/z$  (ESI) calcd for  $\text{C}_{33}\text{H}_{28}\text{BrN}_3\text{NaO}_3$  ( $[\text{M}+\text{Na}]^+$ ) 616.1206, found 616.1215.

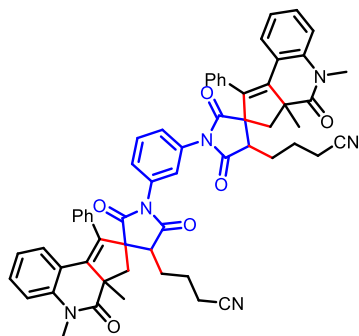

**4,4'-(1,3-Phenylenebis(3a,5-dimethyl-2',4,5'-trioxo-1-phenyl-3,3a,4,5-tetrahydrospiro[cyclopenta[c]quinoline-2,3'-pyrrolidine]-1',4'-diyl))dibutanenitrile (4l).** The

product was purified by silica gel column chromatography with petroleum ether/ethyl acetate (2:1, v/v). Yellow oil (110.5 mg, 58% yield, d.r. = 9:1);  $^1\text{H}$  NMR (400 MHz,  $\text{CDCl}_3$ )  $\delta$ : 7.71 (d,  $J$  = 8.4 Hz, 1H), 7.61-7.57 (m, 1H), 7.48-7.45 (m, 3H), 7.41-7.35 (m, 7H), 7.15-7.02 (m, 6H), 6.88 (t,  $J$  = 4.0 Hz, 2H), 6.81-6.79 (m, 2H), 3.46 (s, 5.4H), 3.43 (s, 0.6H), 3.04-2.99 (m, 2H), 2.82-2.78 (m, 2H), 2.33-2.23 (m, 6H), 1.95-1.78 (m, 4H), 1.72-1.58 (m, 4H), 1.54 (s, 6H);  $^{13}\text{C}$  NMR (101 MHz,  $\text{CDCl}_3$ )  $\delta$ : 179.0, 177.3, 176.1, 174.5, 168.9, 140.5, 140.0, 136.5, 134.3, 133.7, 132.3, 132.0, 129.6, 129.5 (2), 129.0, 128.8, 128.0, 127.8, 125.6, 125.5, 125.1, 123.3, 123.1, 122.7, 120.1, 119.0, 115.1, 64.0, 63.7, 53.5, 53.0, 47.6, 45.5, 39.0, 30.1, 29.7, 29.3, 26.1, 25.7, 23.4, 22.6, 17.0, 14.1; HRMS  $m/z$  (ESI) calcd for  $\text{C}_{60}\text{H}_{52}\text{N}_6\text{NaO}_6$  ( $[\text{M}+\text{Na}]^+$ ) 975.3841, found 975.3831.

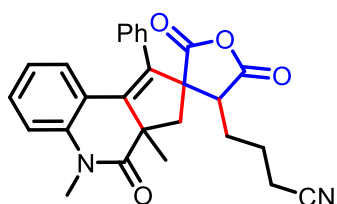

**4-(3a,5-Dimethyl-2',4,5'-trioxo-1-phenyl-3,3a,4,4',5,5'-hexahydro-2'H-spiro[cyclopenta[c]quinoline-2,3'-furan]-4'-yl)butanenitrile (4m).** The product was

purified by silica gel column chromatography with petroleum ether/ethyl acetate (2:1, v/v). Yellow oil (51.9 mg, 59% yield, d.r. > 20:1);  $^1\text{H}$  NMR (500 MHz,  $\text{DMSO}-d_6$ )  $\delta$ : 7.38-7.35 (m, 3H), 7.28-7.24 (m, 1H), 7.22-7.16 (m, 1H), 7.07-7.00 (m, 2H), 6.78-6.75 (m, 1H), 6.59-6.54 (m, 1H), 3.35 (s, 3H), 3.00-2.89 (m, 1H), 2.73-2.52 (m, 1H),

2.36-2.31 (m, 2H), 2.29-2.24 (m, 1H), 1.68-1.60 (m, 1H), 1.38-1.34 (m, 1H), 1.31 (s, 3H), 1.20-1.16 (m, 1H), 1.09-1.00 (m, 1H);  $^{13}\text{C}$  NMR (126 MHz,  $\text{DMSO-}d_6$ )  $\delta$ : 176.1, 175.5, 173.9, 139.9, 139.2, 134.2, 129.0, 128.9, 128.6, 128.4, 128.1, 127.0, 122.0, 120.5, 120.3, 115.5, 64.5, 52.9, 29.8, 26.6, 26.1, 25.0, 23.9, 16.3, 15.9; HRMS  $m/z$  (ESI) calcd for  $\text{C}_{27}\text{H}_{24}\text{N}_2\text{NaO}_4$  ( $[\text{M}+\text{Na}]^+$ ) 463.1628, found 463.1636.

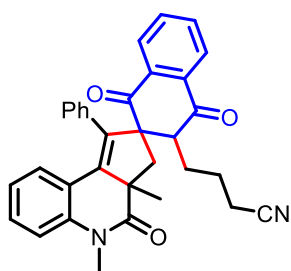

**4-(3a,5-Dimethyl-1',4,4'-trioxo-1-phenyl-3,3a,3',4,4',5-hexahydro-1'H-spiro[cyclopenta[c]quinoline-2,2'-**

**naphthalen]-3'-yl)butanenitrile (4n).** The product was purified by silica gel column chromatography with

petroleum ether/ethyl acetate (3:1, v/v). Yellow oil (61.0 mg, 61% yield, d.r. = 2:1);  $^1\text{H}$  NMR (400 MHz,  $\text{CDCl}_3$ )  $\delta$ : 8.06-7.98 (m, 1H), 7.82-7.67 (m, 2H), 7.31-7.28 (m, 4H), 7.25-7.22 (m, 3H), 7.12-6.93 (m, 2H), 6.86-6.77 (m, 1H), 3.44 (s, 2H), 3.41 (s, 1H), 3.06-2.99 (m, 1H), 2.68-2.53 (m, 1H), 2.08-2.01 (m, 3H), 1.65-1.55 (m, 2H), 1.31 (s, 1H), 1.28-1.24 (m, 2H), 1.21 (s, 2H);  $^{13}\text{C}$  NMR (101 MHz,  $\text{CDCl}_3$ )  $\delta$ : 199.9, 197.8, 197.2, 196.2, 174.5, 173.5, 140.9, 140.2, 139.7, 139.5, 138.1, 137.2, 135.2, 135.1, 134.6, 134.4, 134.3 (2), 133.6, 130.2, 129.3, 128.9, 128.6, 128.4, 128.1, 127.9, 127.2, 126.5, 126.1, 122.6, 122.5, 121.4, 120.3, 119.4, 115.1, 114.9, 70.8, 69.8, 53.3, 53.0, 52.9, 40.0, 38.8, 30.4, 30.0, 29.7, 26.4, 24.7, 24.5, 24.4, 17.5, 16.8; HRMS  $m/z$  (ESI) calcd for  $\text{C}_{33}\text{H}_{28}\text{N}_2\text{NaO}_3$  ( $[\text{M}+\text{Na}]^+$ ) 523.1992, found 523.1983.

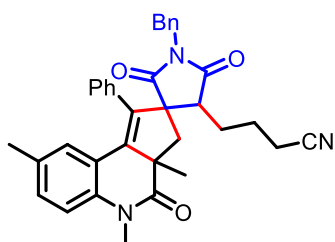

**4-(1'-Benzyl-3a,5,8-trimethyl-2',4,5'-trioxo-1-phenyl-**

**3,3a,4,5-tetrahydrospiro[cyclopenta[c]quinoline-2,3'-**

**pyrrolidin]-4'-yl)butanenitrile (4o).** The product was

purified by silica gel column chromatography with petroleum ether/ethyl acetate (2:1, v/v). Yellow oil (88.0 mg, 81% yield, d.r. = 5:1);  $^1\text{H}$  NMR (400 MHz,  $\text{CDCl}_3$ )  $\delta$ : 7.40-7.33 (m, 5H), 7.26-7.20 (m, 1H), 7.15 (t,  $J = 7.6$  Hz, 2H), 7.07-7.00 (m, 2H), 6.95-6.91 (m, 1H), 6.83-6.80 (m, 1H), 6.59-6.52 (m, 1H), 4.76 (d,  $J = 14.0$  Hz, 1H), 4.66 (d,  $J = 10.4$  Hz, 1H), 3.41 (s, 3H), 3.40-3.37 (m, 1H), 2.87 (t,  $J = 10.8$  Hz, 1H), 2.60 (t,  $J = 7.2$  Hz, 1H), 2.26-2.18 (m, 2H), 2.00 (s, 3H), 1.79-1.71 (m, 2H) 1.60-1.53 (m, 2H), 1.50 (s, 2.5H), 1.47 (s, 0.5H);  $^{13}\text{C}$  NMR (101 MHz,  $\text{CDCl}_3$ )  $\delta$ : 180.2, 179.8, 177.2, 176.7, 174.5, 174.3, 140.2, 139.7, 137.6, 137.4, 136.4, 135.4, 135.2, 133.7, 133.3, 132.0, 130.0, 129.9, 129.3, 129.1, 128.9, 128.7, 128.6 (2), 128.5, 128.3 (2), 128.2, 128.0, 120.0, 119.9, 119.0, 118.8, 114.9, 114.8, 63.0, 62.4, 53.5, 53.1, 46.1, 45.0, 42.7, 42.4, 38.9, 30.1, 28.6, 27.9, 26.9, 26.0, 25.3, 23.4, 22.7, 20.4, 17.0, 16.9; HRMS  $m/z$  (ESI) calcd for  $\text{C}_{35}\text{H}_{33}\text{N}_3\text{NaO}_3$  ( $[\text{M}+\text{Na}]^+$ ) 566.2414, found 566.2403.

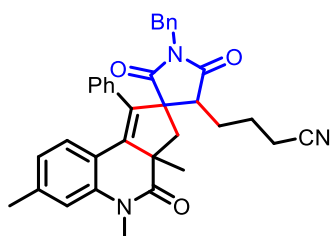

**4-(1'-Benzyl-3a,5,7-trimethyl-2',4,5'-trioxo-1-phenyl-3,3a,4,5-tetrahydrospiro[cyclopenta[*c*]quinoline-2,3'-pyrrolidin]-4'-yl)butanenitrile (4p).** The product was

purified by silica gel column chromatography with petroleum ether/ethyl acetate (2:1, v/v). Yellow oil (85.8 mg, 79% yield, d.r. = 2:1);  $^1\text{H}$  NMR (400 MHz,  $\text{CDCl}_3$ )  $\delta$ : 7.40-7.34 (m, 5H), 7.23-7.18 (m, 2H), 7.15-7.10 (m, 1H), 7.06-7.00 (m, 1H), 6.87-6.82 (m, 2H), 6.69-6.65 (m, 1H), 6.60-6.56 (m, 1H), 4.74-4.64 (m, 2H), 3.43 (s, 3H), 3.42-3.37 (m, 1H), 2.86 (t,  $J = 12.4$  Hz, 1H), 2.64-2.56 (m, 1H), 2.33 (s, 2H), 2.29 (s, 1H), 2.25-2.17 (m, 2H), 1.81-1.71 (m, 2H), 1.63-1.54 (m, 2H), 1.51 (s, 2H), 1.37 (s, 1H);  $^{13}\text{C}$  NMR (101 MHz,  $\text{CDCl}_3$ )  $\delta$ : 180.3, 179.8,

177.4, 177.2, 175.1, 174.7, 140.0, 139.9, 139.6, 139.4, 135.7, 135.4, 133.8, 129.4, 129.2, 129.1, 128.9 (2), 128.7, 128.6, 128.5, 128.3, 128.0, 127.9, 127.8, 127.7, 126.9, 123.4, 123.3, 119.0, 117.4, 115.8, 63.7, 63.0, 53.6, 53.1, 46.7, 45.0, 42.7, 42.4, 38.9, 36.9, 30.1, 28.0, 27.0, 26.1, 25.3, 23.4, 22.7, 22.5, 21.8, 16.9; HRMS  $m/z$  (ESI) calcd for  $C_{35}H_{33}N_3NaO_3$  ( $[M+Na]^+$ ) 566.2414, found 566.2404.

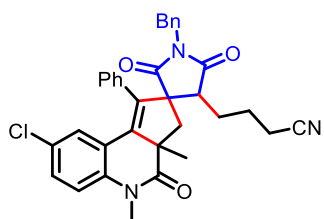

**4-(1'-Benzyl-8-chloro-3a,5-dimethyl-2',4,5'-trioxo-1-phenyl-3,3a,4,5-tetrahydrospiro[cyclopenta[c]quinoline-2,3'-pyrrolidin]-4'-yl)butanenitrile (4q).** The product was

purified by silica gel column chromatography with petroleum ether/ethyl acetate (2:1, v/v). Yellow oil (72.1 mg, 64% yield, d.r. > 20:1);  $^1H$  NMR (400 MHz,  $CDCl_3$ )  $\delta$ : 7.38-7.32 (m, 5H), 7.29 (t,  $J = 7.2$  Hz, 1H), 7.22-7.16 (m, 3H), 7.00-6.97 (m, 1H), 6.81-6.75 (m, 2H), 6.69 (d,  $J = 2.4$  Hz, 1H), 4.77-4.64 (m, 2H), 3.42 (s, 3H), 2.88 (d,  $J = 14.4$  Hz, 1H), 2.64-2.57 (m, 1H), 2.27-2.21 (m, 2H), 2.10 (d,  $J = 14.4$  Hz, 1H), 1.91-1.80 (m, 2H), 1.66-1.58 (m, 2H), 1.51 (s, 3H);  $^{13}C$  NMR (101 MHz,  $CDCl_3$ )  $\delta$ : 179.8, 177.1, 174.3, 138.6 (2), 138.4, 135.3, 132.9, 131.1, 129.4, 129.1, 128.8, 128.7 (2), 128.1, 127.9, 127.7, 121.6, 118.9, 116.3, 63.1, 53.3, 44.6, 42.8, 39.4, 30.2, 26.8, 25.4, 23.4, 17.6; HRMS  $m/z$  (ESI) calcd for  $C_{34}H_{30}ClN_3NaO_3$  ( $[M+Na]^+$ ) 586.1868, found 586.1874.

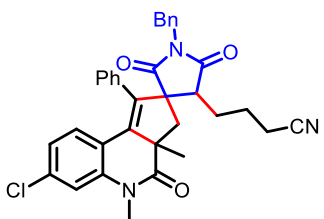

**4-(1'-Benzyl-7-chloro-3a,5-dimethyl-2',4,5'-trioxo-1-phenyl-3,3a,4,5-tetrahydrospiro[cyclopenta[c]quinoline-2,3'-pyrrolidin]-4'-yl)butanenitrile (4r).** The product was

purified by silica gel column chromatography with petroleum ether/ethyl acetate (2:1,

v/v). Yellow oil (76.6 mg, 68% yield, d.r. = 1.5:1);  $^1\text{H}$  NMR (400 MHz,  $\text{CDCl}_3$ )  $\delta$ : 7.68-7.64 (m, 0.4H), 7.51-7.44 (m, 0.6H), 7.21-7.19 (m, 2H), 7.17-7.09 (m, 4H), 7.02-6.98 (m, 1H), 6.95-6.84 (m, 3H), 6.70-6.60 (m, 2H), 4.42-4.19 (m, 2H), 3.34 (s, 1.8H), 3.32 (s, 1.2H), 3.16-3.05 (m, 1H), 2.97-2.76 (m, 1H), 2.70-2.54 (m, 1H), 2.42-2.27 (m, 2H), 1.68-1.53 (m, 2H), 1.35-1.27 (m, 2H), 1.18 (s, 3H);  $^{13}\text{C}$  NMR (101 MHz,  $\text{CDCl}_3$ )  $\delta$ : 178.4, 178.0, 177.2, 176.5, 175.7, 173.4, 140.8, 138.9, 138.4, 135.1, 134.9, 134.7, 132.9, 131.8, 131.1, 129.9, 129.2, 129.1, 129.0, 128.9, 128.8 (2), 128.7 (2), 128.6, 128.5, 128.4, 128.3, 128.1, 128.0, 127.7, 122.5, 118.8, 118.5, 115.4, 63.7, 63.0, 53.7, 53.0, 52.6, 46.4, 45.2, 42.4, 36.9, 31.7, 30.2, 29.2, 28.6, 27.9, 27.0, 22.9, 22.5, 17.0; HRMS  $m/z$  (ESI) calcd for  $\text{C}_{34}\text{H}_{30}\text{ClN}_3\text{NaO}_3$  ( $[\text{M}+\text{Na}]^+$ ) 586.1868, found 586.1876.

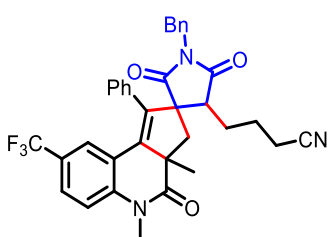

**4-(1'-Benzyl-3a,5-dimethyl-2',4,5'-trioxo-1-phenyl-8-(trifluoromethyl)-3,3a,4,5-tetrahydropyrrolo[quinoline-2,3'-pyrrolidin]-4'-yl)butanenitrile (4s).** The product was

purified by silica gel column chromatography with petroleum ether/ethyl acetate (2:1, v/v). Yellow oil (75.3 mg, 63% yield, d.r. = 2:1);  $^1\text{H}$  NMR (400 MHz,  $\text{CDCl}_3$ )  $\delta$ : 7.58-7.43 (m, 2H), 7.38-7.34 (m, 3H), 7.30-7.24 (m, 2H), 7.20-7.10 (m, 3H), 7.08-7.03 (m, 1H), 7.00-6.96 (m, 1H), 6.88-6.78 (m, 1H), 4.75-4.65 (m, 1H), 4.51-4.34 (m, 1H), 3.46 (s, 3H), 2.99-2.89 (m, 1H), 2.65-2.61 (m, 1H), 2.50-2.36 (m, 1H), 2.33-2.21 (m, 2H), 1.92-1.77 (m, 2H), 1.56-1.50 (m, 2H), 1.38 (s, 1H), 1.25 (s, 2H);  $^{13}\text{C}$  NMR (101 MHz,  $\text{CDCl}_3$ )  $\delta$ : 179.8, 178.3, 177.1, 177.0, 174.6, 173.5, 142.5, 142.2, 140.3, 139.0, 138.4, 138.1, 135.1 (q,  $J_{\text{C-F}} = 20.3$  Hz), 132.6, 132.3, 131.8, 131.1, 129.5, 129.1,

129.0 (2), 128.9, 128.8 (2), 128.7 (2), 128.5, 128.3, 128.1, 127.7, 125.3 (q,  $J_{C-F} = 273.5$  Hz), 125.2 (q,  $J_{C-F} = 3.8$  Hz), 120.3, 118.9, 118.8, 115.1, 115.0, 63.7, 63.0, 53.7, 53.3, 52.9, 52.6, 46.3, 45.0, 42.8, 39.0, 36.9, 30.3, 29.2, 27.0, 26.0, 25.4, 23.3, 22.6, 17.0, 16.9;  $^{19}\text{F}$  NMR (377 MHz,  $\text{CDCl}_3$ )  $\delta$ : -62.8; HRMS  $m/z$  (ESI) calcd for  $\text{C}_{35}\text{H}_{30}\text{F}_3\text{N}_3\text{NaO}_3$  ( $[\text{M}+\text{Na}]^+$ ) 620.2131, found 620.2121.

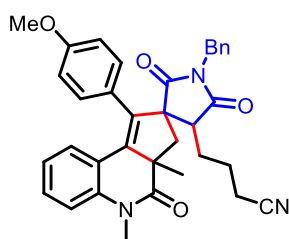

**4-(1'-Benzyl-1-(4-methoxyphenyl)-3a,5-dimethyl-2',4,5'-trioxo-3,3a,4,5-tetrahydrospiro[cyclopenta[c]quinoline-2,3'-pyrrolidin]-4'-yl)butanenitrile (4t).** The product was purified by silica gel column chromatography with

petroleum ether/ethyl acetate (2:1, v/v). Yellow solid (79.4 mg, 71% yield, d.r. = 2:1);  $^1\text{H}$  NMR (400 MHz,  $\text{CDCl}_3$ )  $\delta$ : 7.69-7.64 (m, 2H), 7.50-7.46 (m, 2H), 7.38-7.28 (m, 1H), 7.23-7.16 (m, 2H), 7.15-7.11 (m, 2H), 7.01-6.98 (m, 1H), 6.84-6.61 (m, 3H), 4.71-4.53 (m, 1H), 4.33-4.31 (m, 1H), 3.85 (s, 6H), 3.71-3.70 (m, 1H), 3.36-3.34 (m, 1H), 2.89-2.76 (m, 1H), 2.39-2.29 (m, 2H), 1.79-1.68 (m, 2H), 1.54-1.45 (m, 2H), 1.29 (s, 1H), 1.18 (s, 2H);  $^{13}\text{C}$  NMR (101 MHz,  $\text{CDCl}_3$ )  $\delta$ : 178.7, 177.5, 175.5, 173.7, 168.1, 159.4, 139.7, 139.4, 138.2, 135.1, 131.9, 131.1, 130.2, 129.2, 128.8 (2), 128.7, 128.4, 128.0, 127.7, 127.2, 125.1, 122.5, 120.2, 118.8, 115.0, 114.3, 63.7, 55.0, 52.9, 52.7, 46.7, 42.5, 39.0, 36.8, 34.4, 30.5, 30.1, 28.1, 26.9, 22.8, 22.5, 17.0 (2); HRMS  $m/z$  (ESI) calcd for  $\text{C}_{35}\text{H}_{33}\text{N}_3\text{NaO}_4$  ( $[\text{M}+\text{Na}]^+$ ) 582.2363, found 582.2355.

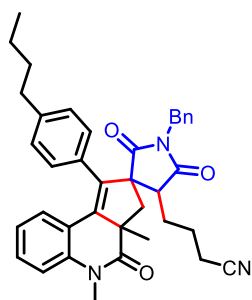

**4-(1'-Benzyl-1-(4-butylphenyl)-3a,5-dimethyl-2',4,5'-trioxo-3,3a,4,5-tetrahydrospiro[cyclopenta[c]quinoline-2,3'-pyrrolidin]-4'-yl)butanenitrile (4u).** The product was purified

by silica gel column chromatography with petroleum ether/ethyl acetate (2:1, v/v). Yellow oil (92.5 mg, 79% yield, d.r. = 2:1);  $^1\text{H}$  NMR (400 MHz,  $\text{CDCl}_3$ )  $\delta$ : 7.30-7.28 (m, 3H), 7.22-7.06 (m, 3H), 7.04-6.94 (m, 2H), 6.89-6.87 (m, 1H), 6.84-6.75 (m, 1H), 6.73-6.63 (m, 3H), 4.70-4.57 (m, 1.4H), 4.31-4.23 (m, 0.7H), 3.36 (s, 3H), 2.87-2.79 (m, 1H), 2.60-2.53 (m, 1H), 2.51-2.46 (m, 2H), 2.33 (t,  $J = 18.0$  Hz, 1H), 2.17-2.10 (m, 2H), 1.92-1.60 (m, 4H), 1.52-1.48 (m, 2H), 1.42 (s, 2H), 1.29-1.26 (m, 2H), 1.18 (s, 1H), 0.87 (t,  $J = 7.2$  Hz, 3H);  $^{13}\text{C}$  NMR (101 MHz,  $\text{CDCl}_3$ )  $\delta$ : 180.2, 178.7, 177.4, 177.3, 174.7, 173.6, 143.2, 139.9, 139.5, 138.4, 136.9, 135.4, 135.2, 131.8, 131.1, 130.6, 129.2, 128.9 (2), 128.8, 128.7, 128.6, 128.4, 128.3, 128.1, 128.0, 122.5, 120.3, 119.0, 115.0, 63.8, 63.1, 53.7, 53.4, 53.0, 52.6, 46.5, 44.9, 42.7, 42.3, 38.9, 35.3, 33.2, 30.1, 29.2, 26.9, 26.0, 25.3, 23.3, 22.5, 22.3 (2), 17.0, 16.9, 13.9; HRMS  $m/z$  (ESI) calcd for  $\text{C}_{38}\text{H}_{39}\text{N}_3\text{NaO}_3$  ( $[\text{M}+\text{Na}]^+$ ) 608.2884, found 608.2875.

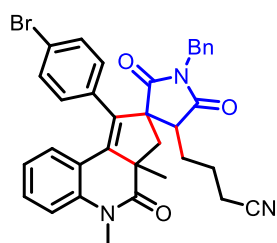

**4-(1'-Benzyl-1-(4-bromophenyl)-3a,5-dimethyl-2',4,5'-trioxo-3,3a,4,5-tetrahydrospiro[cyclopenta[c]quinoline-2,3'-pyrrolidin]-4'-yl)butanenitrile (4v).** The product was

purified by silica gel column chromatography with petroleum ether/ethyl acetate (2:1, v/v). Yellow oil (76.5 mg, 63% yield, d.r. = 1:1);  $^1\text{H}$  NMR (400 MHz,  $\text{CDCl}_3$ )  $\delta$ : 7.37 (s, 2H), 7.31-7.28 (m, 1H), 7.22-7.18 (m, 3H), 7.07-6.97 (m, 4H), 6.84-6.77 (m, 1H), 6.71-6.67 (m, 2H), 4.80-4.63 (m, 1H), 4.41-4.31 (m, 1H), 3.43 (s, 1.5H), 3.41 (s, 1.5H), 3.40-3.37 (m, 1H), 2.95-2.88 (m, 1H), 2.55-2.44 (m, 1H), 2.38-2.21 (m, 2H), 1.95-1.80 (m, 2H), 1.78-1.62 (m, 2H), 1.49 (s, 1.5H), 1.37 (s, 1.5H);  $^{13}\text{C}$  NMR (101 MHz,  $\text{CDCl}_3$ )  $\delta$ : 180.0, 178.4, 177.2, 176.9, 174.4, 173.4, 140.8, 140.0, 138.9, 138.5,



135.4, 135.1, 135.0, 132.9, 132.5, 132.1, 130.6, 129.6, 129.0, 128.9, 128.8, 128.7, 128.5, 128.3, 127.7, 122.7, 122.5, 119.8, 118.8, 118.5, 115.4, 115.2, 63.7, 62.9, 53.6, 53.0, 46.4, 45.2, 42.8, 42.4, 38.9, 36.9, 30.1, 27.9, 27.0, 26.0, 25.4, 23.4, 22.5, 17.0; HRMS  $m/z$  (ESI) calcd for  $C_{34}H_{30}BrN_3NaO_3$  ( $[M+Na]^+$ ) 630.1363, found 630.1354.

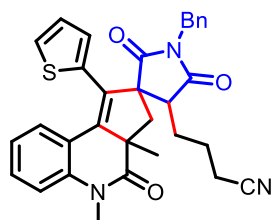

**4-(1'-Benzyl-3a,5-dimethyl-2',4,5'-trioxo-1-(thiophen-2-yl)-3,3a,4,5-tetrahydrospiro[cyclopenta[c]quinoline-2,3'-pyrrolidin]-4'-yl)butanenitrile (4w).** The product was

purified by silica gel column chromatography with petroleum ether/ethyl acetate (2:1, v/v). Yellow oil (67.5 mg, 63% yield, d.r. = 9:1);  $^1H$  NMR (400 MHz,  $CDCl_3$ )  $\delta$ : 7.39-7.33 (m, 6H), 7.30-7.28 (m, 2H), 7.06-7.02 (m, 2H), 6.89-6.85 (m, 2H), 4.77-4.65 (m, 2H), 3.43 (s, 2.7H), 3.42 (s, 0.3H), 3.23-3.13 (m, 1H), 2.93-2.88 (m, 1H), 2.72-2.68 (m, 1H), 2.46-2.31 (m, 2H), 1.83-1.77 (m, 2H), 1.64-1.56 (m, 2H), 1.48 (s, 3H);  $^{13}C$  NMR (101 MHz,  $CDCl_3$ )  $\delta$ : 180.1, 179.7, 177.4, 177.2, 174.3, 174.2, 142.6, 140.0, 135.4, 133.7, 129.8, 129.7, 129.5, 129.3, 128.7 (2), 128.6, 128.5, 128.1, 127.9, 127.7, 127.6, 127.2, 127.1, 122.7, 122.6, 119.9, 119.0, 118.8, 115.2, 115.1, 63.6, 63.4, 53.7, 53.3, 46.7, 45.3, 43.3, 42.8, 39.1, 38.5, 30.1, 29.6, 26.2, 25.4, 23.4, 22.6, 17.0, 14.1; HRMS  $m/z$  (ESI) calcd for  $C_{32}H_{29}N_3NaO_3S$  ( $[M+Na]^+$ ) 558.1822, found 558.1814.

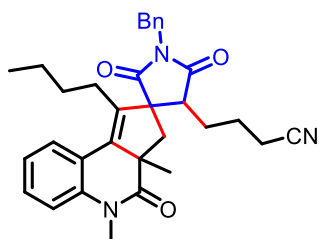

**4-(1'-Benzyl-1-butyl-3a,5-dimethyl-2',4,5'-trioxo-3,3a,4,5-tetrahydrospiro[cyclopenta[c]quinoline-2,3'-pyrrolidin]-4'-yl)butanenitrile (4x).** The product was purified by silica

gel column chromatography with petroleum ether/ethyl acetate (3:1, v/v). Yellow oil (71.3 mg, 70% yield, d.r. > 20:1);  $^1H$  NMR (400 MHz,  $CDCl_3$ )  $\delta$ : 7.41-7.36 (m, 4H),

7.33-7.29 (m, 3H), 7.15-7.07 (m, 2H), 4.72-4.65 (m, 2H), 3.38 (s, 3H), 2.87 (t,  $J = 7.2$  Hz, 1H), 2.81 (t,  $J = 7.2$  Hz, 1H), 2.43-2.36 (m, 3H), 1.95-1.91 (m, 2H), 1.66-1.51 (m, 2H), 1.34 (s, 3H), 1.31-1.08 (m, 6H), 0.79 (t,  $J = 7.2$  Hz, 3H);  $^{13}\text{C}$  NMR (101 MHz,  $\text{CDCl}_3$ )  $\delta$ : 180.4, 177.5, 175.0, 139.6, 138.4, 137.6, 135.4, 129.0, 128.7, 128.1, 127.2, 123.0, 122.0, 121.4, 119.0, 115.1, 61.9, 52.9, 45.1, 42.8, 38.7, 30.8, 30.1, 26.1, 26.0, 25.5, 23.5, 23.0, 17.1, 13.6; HRMS  $m/z$  (ESI) calcd for  $\text{C}_{32}\text{H}_{35}\text{N}_3\text{NaO}_3$  ( $[\text{M}+\text{Na}]^+$ ) 532.2571, found 532.2563.

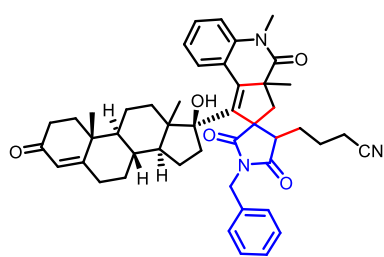

**4-(1'-Benzyl-1-((8*R*,9*S*,10*R*,14*S*,17*S*)-17-hydroxy-10,13-dimethyl-3-oxo-2,3,6,7,8,9,10,11,12,13,14,15,16,17-tetradecahydro-1*H*-cyclopenta[*a*]phenanthren-17-yl)-3*a*,5-dimethyl-2',4,5'-trioxo-3,3*a*,4,5-tetrahydrospiro[cyclopenta[*c*]quinoline-2,3'-pyrrolidin]-4'-yl)butanenitrile (4y).** The product was purified by silica gel column chromatography with petroleum ether/ethyl acetate (2:1, v/v). Yellow oil (88.7 mg, 60% yield, d.r. > 20:1);  $^1\text{H}$  NMR (400 MHz,  $\text{CDCl}_3$ )  $\delta$ : 8.14 (d,  $J = 8.4$  Hz, 1H), 7.66 (d,  $J = 8.0$  Hz, 1H), 7.51 (d,  $J = 8.0$  Hz, 1H), 7.44 (t,  $J = 8.0$  Hz, 1H), 7.32 (s, 1H), 7.20-7.15 (m, 4H), 5.70 (s, 1H), 3.71 (s, 2H), 3.16 (s, 3H), 2.43-2.26 (m, 6H), 2.17-2.10 (m, 5H), 1.95-1.80 (m, 4H), 1.70-1.55 (m, 5H), 1.44-1.32 (m, 4H), 1.19 (s, 6H), 1.16 (s, 3H), 1.09-0.98 (m, 4H);  $^{13}\text{C}$  NMR (101 MHz,  $\text{CDCl}_3$ )  $\delta$ : 199.7, 171.2, 168.1, 162.7, 160.2, 146.1, 138.8, 130.4, 129.2, 128.8, 127.1, 126.7, 125.5, 125.4, 123.6, 122.1, 120.3, 114.2, 111.0, 60.0, 53.4, 49.0, 39.5, 38.7, 35.4, 34.6, 34.5, 34.3, 33.9, 33.0,

32.8, 31.9, 31.1, 29.9, 29.7 (2), 29.5, 29.3, 27.2, 20.3, 20.0, 18.7, 17.4, 14.8; HRMS  $m/z$  (ESI) calcd for  $C_{47}H_{53}N_3NaO_5$  ( $[M+Na]^+$ ) 762.3877, found 762.3869.

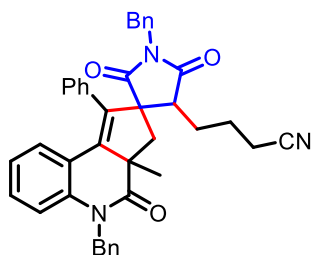

**4-(1',5-Dibenzyl-3a-methyl-2',4,5'-trioxo-1-phenyl-3,3a,4,5-tetrahydrospiro[cyclopenta[c]quinoline-2,3'-pyrrolidin]-4'-yl)butanenitrile (4z).** The product was purified by silica gel column chromatography with

petroleum ether/ethyl acetate (2:1, v/v). Yellow oil (75.1 mg, 62% yield, d.r. = 2:1);

$^1H$  NMR (400 MHz,  $CDCl_3$ )  $\delta$ : 7.38-7.32 (m, 7H), 7.21-7.17 (m, 3H), 7.12-7.01 (m, 4H), 6.95-6.77 (m, 4H), 6.74-6.70 (m, 1H), 5.65 (d,  $J = 16.0$  Hz, 1H), 4.80 (d,  $J = 8.8$  Hz, 1H), 4.76 (d,  $J = 6.4$  Hz, 1H), 4.67 (d,  $J = 14.0$  Hz, 1H), 2.96 (t,  $J = 6.8$  Hz, 1H), 2.67-2.60 (m, 1H), 2.48-2.36 (m, 1H), 2.25-2.17 (m, 2H), 1.85-1.75 (m, 2H), 1.64 (s, 2H), 1.62-1.58 (m, 2H), 1.51 (s, 1H);  $^{13}C$  NMR (101 MHz,  $CDCl_3$ )  $\delta$ : 180.2, 178.6, 177.4, 177.2, 174.8, 173.8, 139.9, 139.6, 139.5, 139.1, 138.4, 137.0, 136.9, 135.4, 135.2, 133.7, 133.3, 129.4, 129.3, 129.2, 128.9 (2), 128.8, 128.7 (2), 128.6, 128.5, 128.3, 128.2, 128.1, 127.7, 127.2, 127.1, 126.2, 126.0, 122.8, 122.6, 120.4, 118.9, 118.8, 115.9, 115.8, 63.9, 63.1, 53.7, 53.3, 46.7, 46.4, 45.0, 42.8, 42.4, 38.8, 36.9, 29.7, 27.7, 27.0, 26.1, 25.3, 23.4, 22.7, 17.0, 16.9; HRMS  $m/z$  (ESI) calcd for  $C_{40}H_{35}N_3NaO_3$  ( $[M+Na]^+$ ) 628.2571, found 628.2562.

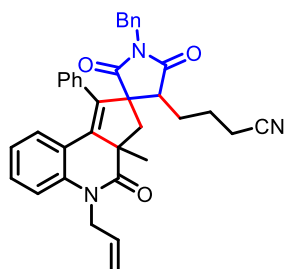

**4-(5-Allyl-1'-benzyl-3a-methyl-2',4,5'-trioxo-1-phenyl-3,3a,4,5-tetrahydrospiro[cyclopenta[c]quinoline-2,3'-pyrrolidin]-4'-yl)butanenitrile (4aa).** The product was purified by silica gel column chromatography with petroleum

ether/ethyl acetate (2:1, v/v). Yellow oil (80.0 mg, 72% yield, d.r. = 2:1); <sup>1</sup>H NMR (400 MHz, CDCl<sub>3</sub>) δ: 7.38-7.34 (m, 4H), 7.21-7.12 (m, 4H), 7.10-6.98 (m, 3H), 6.84-6.79 (m, 2H), 6.73 (t, *J* = 8.0 Hz, 1H), 5.96-5.88 (m, 1H), 5.23-5.15 (m, 2H), 5.01-4.93 (m, 1H), 4.79-4.63 (m, 2H), 4.28-4.20 (m, 1H), 2.96-2.91 (m, 1H), 2.66-2.58 (m, 1H), 2.49-2.27 (m, 1H), 2.26-2.17 (m, 2H), 1.80-1.70 (m, 2H), 1.66-1.58 (m, 2H), 1.56 (s, 2H), 1.42 (s, 1H); <sup>13</sup>C NMR (101 MHz, CDCl<sub>3</sub>) δ: 180.2, 178.5, 177.3, 177.2, 174.2, 173.2, 139.9, 139.3, 139.0, 138.2, 136.9, 135.4, 135.1, 133.6, 132.3, 132.2, 129.3, 129.1, 128.9, 128.7, 128.6, 128.5, 128.4, 128.3, 128.1 (2), 127.7, 127.1, 122.7, 122.5, 120.3, 120.2, 118.9, 118.8, 116.0, 115.7, 115.6, 63.8, 63.1, 53.5, 53.1, 46.4, 45.3, 45.0, 42.8, 42.4, 38.8, 36.8, 27.7, 26.9, 26.0, 25.3, 23.3, 22.6, 17.0, 16.9; HRMS *m/z* (ESI) calcd for C<sub>36</sub>H<sub>33</sub>N<sub>3</sub>NaO<sub>3</sub> ([M+Na]<sup>+</sup>) 578.2414, found 578.2406.

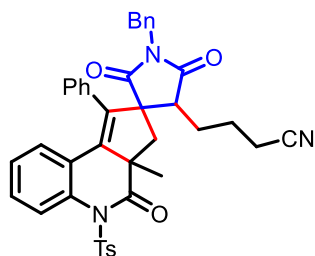

**4-(1'-Benzyl-3a-methyl-2',4,5'-trioxo-1-phenyl-5-tosyl-3,3a,4,5-tetrahydrospiro[cyclopenta[c]quinoline-2,3'-pyrrolidin]-4'-yl)butanenitrile (4ab).** The product was purified by silica gel column chromatography with

petroleum ether/ethyl acetate (2:1, v/v). Yellow oil (76.3 mg, 57% yield, d.r. = 2.3:1); <sup>1</sup>H NMR (400 MHz, CDCl<sub>3</sub>) δ: 7.98 (d, *J* = 8.4 Hz, 1.4H), 7.88 (d, *J* = 8.4 Hz, 0.6H), 7.78-7.74 (m, 1H), 7.40-7.34 (m, 7H), 7.32-7.30 (m, 2H), 7.22-7.19 (m, 1H), 7.15 (t, *J* = 7.6 Hz, 1H), 7.02-6.97 (m, 2H), 6.82-6.79 (m, 2H), 4.81-4.66 (m, 0.6H), 4.65-4.55 (m, 1.4H), 2.76-2.71 (m, 1H), 2.47 (s, 3H), 2.40-2.33 (m, 2H), 2.24-2.15 (m, 2H), 1.76-1.58 (m, 2H), 1.49-1.40 (m, 2H), 1.33 (s, 3H); <sup>13</sup>C NMR (101 MHz, CDCl<sub>3</sub>) δ: 179.7, 177.4, 176.9, 176.8, 175.3, 145.1, 144.9, 138.7, 138.4, 138.2, 136.9, 136.2,

135.3, 135.2, 135.1, 134.6, 132.5, 130.5, 129.5, 129.3, 129.1, 128.9, 128.8, 128.6, 128.5, 128.4, 128.2 (2), 127.9, 127.5, 127.0, 126.3, 126.1, 125.5, 125.4, 124.4, 123.7 (2), 123.6, 118.8 (2), 64.0, 63.0, 56.7, 55.9, 45.8, 45.1, 42.9, 42.4, 38.7, 37.2, 36.7, 29.7, 27.2, 25.3, 25.0, 24.3, 22.7, 21.7, 17.0, 16.8; HRMS  $m/z$  (ESI) calcd for  $C_{40}H_{35}N_3NaO_5S$  ( $[M+Na]^+$ ) 692.2190, found 692.2181.

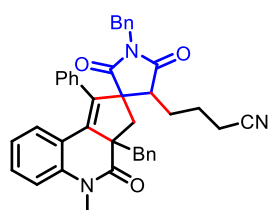

**4-(1',3a-Dibenzyl-5-methyl-2',4,5'-trioxo-1-phenyl-3,3a,4,5-tetrahydrospiro[cyclopenta[c]quinoline-2,3'-pyrrolidin]-4'-yl)butanenitrile (4ac).** The product was

purified by silica gel column chromatography with petroleum ether/ethyl acetate (2:1, v/v). Yellow oil (84.7 mg, 70% yield, d.r. = 2:1);  $^1H$  NMR (400 MHz,  $CDCl_3$ )  $\delta$ : 7.41-7.33 (m, 4H), 7.24-7.18 (m, 8H), 7.14-7.09 (m, 4H), 7.02-6.97 (m, 1H), 6.81-6.76 (m, 1H), 6.61 (t,  $J = 7.6$  Hz, 1H), 4.48-4.46 (m, 2H), 3.52-3.48 (m, 2H), 3.44 (s, 1H), 3.43 (s, 2H), 2.76-2.57 (m, 1H), 2.27-2.20 (m, 4H), 1.77-1.72 (m, 2H), 1.30-1.23 (m, 2H);  $^{13}C$  NMR (101 MHz,  $CDCl_3$ )  $\delta$ : 178.1, 178.0, 177.8 (2), 172.4, 172.2, 139.7, 139.2, 138.9, 138.3 (2), 137.4, 137.2, 135.5, 135.2, 134.0, 133.8, 132.0, 131.9, 131.0, 130.6, 130.3, 129.9, 128.8, 128.7, 128.6, 128.4 (2), 128.2 (2), 127.9, 127.5, 127.0, 126.8, 126.4, 126.3, 122.9, 122.7, 122.5 (2), 118.9, 118.8, 115.1, 114.6 (2), 64.2, 58.6, 46.7, 46.4, 46.3, 45.9, 42.3, 41.9, 36.9, 36.8, 36.3, 30.6, 30.0, 29.4, 27.1, 22.1, 21.9, 17.1, 17.0; HRMS  $m/z$  (ESI) calcd for  $C_{40}H_{35}N_3NaO_3$  ( $[M+Na]^+$ ) 628.2571, found 628.2562.

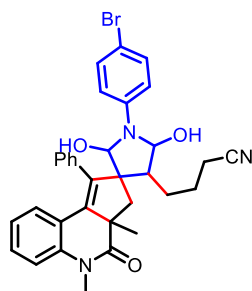

**4-(1'-(4-Bromophenyl)-2',5'-dihydroxy-3a,5-dimethyl-4-oxo-1-phenyl-3,3a,4,5-tetrahydrospiro[cyclopenta[c]quinoline-2,3'-pyrrolidin]-4'-yl)butanenitrile (5a).** The product was

purified by silica gel column chromatography with petroleum ether/ethyl acetate (2:1, v/v). Yellow oil (77.6 mg, 65% yield, d.r. = 4:1); <sup>1</sup>H NMR (400 MHz, CDCl<sub>3</sub>) δ: 7.56-7.50 (m, 2H), 7.45-7.38 (m, 3H), 7.18 (d, *J* = 7.2 Hz, 2H), 7.01-6.92 (m, 3H), 6.79-6.70 (m, 3H), 5.32 (d, *J* = 5.2 Hz, 1H), 5.29-4.83 (m, 1H), 3.35 (t, *J* = 2.8 Hz, 1H), 3.32 (d, *J* = 6.4 Hz, 3H), 3.26-3.20 (m, 1H), 2.85-2.80 (m, 1H), 2.35-2.25 (m, 1H), 2.21 (d, *J* = 14.4 Hz, 1H), 1.99-1.91 (m, 2H), 1.82-1.76 (m, 1H), 1.64-1.58 (m, 1H), 1.37 (s, 2.4H), 1.33 (s, 0.6H); <sup>13</sup>C NMR (101 MHz, CDCl<sub>3</sub>) δ: 177.3, 176.0, 139.7 (2), 139.6, 138.8, 138.1, 137.6, 137.3, 135.3, 135.1, 134.7, 134.4, 132.4, 132.0 (2), 131.9, 131.8, 131.5, 129.9, 129.5, 129.1 (2), 129.0, 128.8, 128.6, 128.3 (2), 128.2, 128.0, 125.5, 125.4, 124.9, 123.9, 123.7, 122.8, 120.7 (2), 119.5, 119.4, 118.8, 115.1 (2), 86.1, 83.4, 83.0, 64.4, 63.6, 53.6, 53.4, 46.1, 42.7, 40.2, 38.2, 30.3, 30.1, 27.5, 26.5, 26.2, 26.0, 23.5, 23.0, 17.1, 16.9.

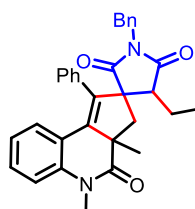

**Ethyl 4-(1'-benzyl-3a,5-dimethyl-2',4,5'-trioxo-1-phenyl-3,3a,4,5-tetrahydrospiro[cyclopenta[c]quinoline-2,3'-pyrrolidin]-4'-yl)butanoate (6a).** The product was purified

by silica gel column chromatography with petroleum ether/ethyl acetate (1:1, v/v). White solid (96.8 mg, 84% yield, d.r. = 2:1); <sup>1</sup>H NMR (400 MHz, CDCl<sub>3</sub>) δ: 7.56 (s, 4H), 7.51-7.44 (m, 4H), 7.42-7.33 (m, 2H), 7.22 (t, *J* = 7.6 Hz, 1H), 7.03 (d, *J* = 7.2 Hz, 1H), 6.98-6.89 (m, 2H), 4.97-4.84 (m, 2H), 4.79-4.31 (m, 2H), 3.64 (s, 2H), 3.62 (s, 1H), 3.42-3.04 (m, 2H), 2.87-2.77 (m, 1H), 2.60-2.39 (m, 2H), 2.34-2.12 (m, 2H), 1.97 (s, 2H), 1.77 (s, 1H), 1.71 (s, 2H), 1.45 (t, *J* = 6.8 Hz, 1H), 1.05 (t, *J* = 7.6 Hz, 2H); <sup>13</sup>C NMR (101 MHz, CDCl<sub>3</sub>) δ: 180.1, 179.7, 178.5, 177.3, 177.1, 175.3, 174.5,

173.5, 139.9, 139.4, 138.2, 136.7, 135.4, 135.1, 133.6, 133.2, 129.4, 129.3, 129.2, 129.0, 128.9 (2), 128.7, 128.6, 128.5, 128.4, 128.3, 128.0 (3), 127.7, 127.1, 122.5, 122.4, 120.1, 118.9, 118.8, 115.0, 114.9, 63.7, 63.1, 62.9, 62.5, 53.5, 53.0, 46.5, 45.0, 42.7, 40.9, 38.9, 36.9, 30.1, 27.9, 26.0, 25.3, 23.3, 22.5, 16.9 (2).

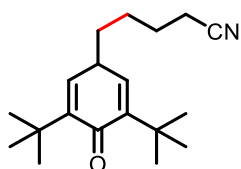

**5-(3,5-Di-*tert*-butyl-4-oxocyclohexa-2,5-dien-1-yl)pentanenitrile**

**(7a).**<sup>3</sup> The product was purified by silica gel column chromatography with petroleum ether/ethyl acetate (10:1, v/v),

29.9 mg, 52% yield; <sup>1</sup>H NMR (400 MHz, CDCl<sub>3</sub>)  $\delta$ : 6.40 (s, 2H), 2.30 (t,  $J = 7.2$  Hz, 2H), 1.77-1.73 (m, 2H), 1.44-1.25 (m, 5H), 1.23 (s, 18H); <sup>13</sup>C NMR (101 MHz, CDCl<sub>3</sub>)  $\delta$ : 186.2, 147.2, 145.4, 119.2, 39.7, 39.5, 34.6, 29.4, 27.2, 20.8, 17.3.

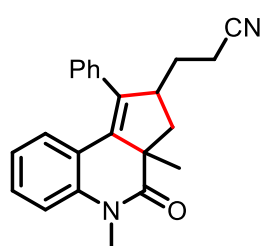

**3-(3a,5-Dimethyl-4-oxo-1-phenyl-3,3a,4,5-tetrahydro-2H-cyclopenta[*c*]quinolin-2-yl)propanenitrile (8a).**<sup>1</sup> The product

was purified by silica gel column chromatography with petroleum ether/ethyl acetate (2:1, v/v), 38.3 mg, 56% yield,

d.r. = 2:1; <sup>1</sup>H NMR (400 MHz, CDCl<sub>3</sub>)  $\delta$ : 7.29 (d,  $J = 7.6$  Hz, 2H), 7.24-7.17 (m, 1H), 7.13 (t,  $J = 8.4$  Hz, 3H), 6.98 (d,  $J = 8.0$  Hz, 1H), 6.93 (t,  $J = 7.2$  Hz, 1H), 6.70 (t,  $J = 7.6$  Hz, 1H), 3.34 (s, 1H), 3.32 (s, 2H), 2.96-2.91 (m, 1H), 2.38-2.32 (m, 1H), 2.28-2.11 (m, 2H), 2.09-2.00 (m, 1H), 1.74-1.60 (m, 2H), 1.26 (s, 2H), 1.17 (s, 1H); <sup>13</sup>C NMR (101 MHz, CDCl<sub>3</sub>)  $\delta$ : 175.1, 174.9, 141.9, 140.3, 140.1, 139.5, 136.7, 135.7, 135.5, 134.8, 128.9, 128.7, 128.6 (3), 128.1, 127.7 (2), 127.6, 127.2, 122.5, 122.4, 121.3, 120.8, 119.4, 119.3, 115.1, 114.8, 53.8, 52.7, 49.8, 45.0, 39.9, 37.6, 31.0, 30.1, 29.9, 29.6, 27.6, 23.5, 16.0, 14.8.

## **(D) Density functional theory calculations**

All data in this study were calculated with the Gaussian 16 software package<sup>4</sup> and were optimized at the B3LYP level of density functional theory (DFT).<sup>5</sup> The basis set 6-31G (d) was selected for C, H, O, N and F atoms. Vibrational frequency analysis was computed to ensure the points that the minimum have no imaginary frequency and the transition states have only one imaginary frequency. In order to consider the solvent effects, the solvation corrected single-point energy calculations (based on the gas-phase optimized geometries) were calculated by using the M06 method in conjunction with the SMD solvation model<sup>6</sup> in solvent (DCE). In the solvation-corrected calculations, 6-311++G (d, p) basis set was chosen for all nonmetal atoms. The single-point energy corrected relative free energies in kcal/mol are used for discussion throughout the text.



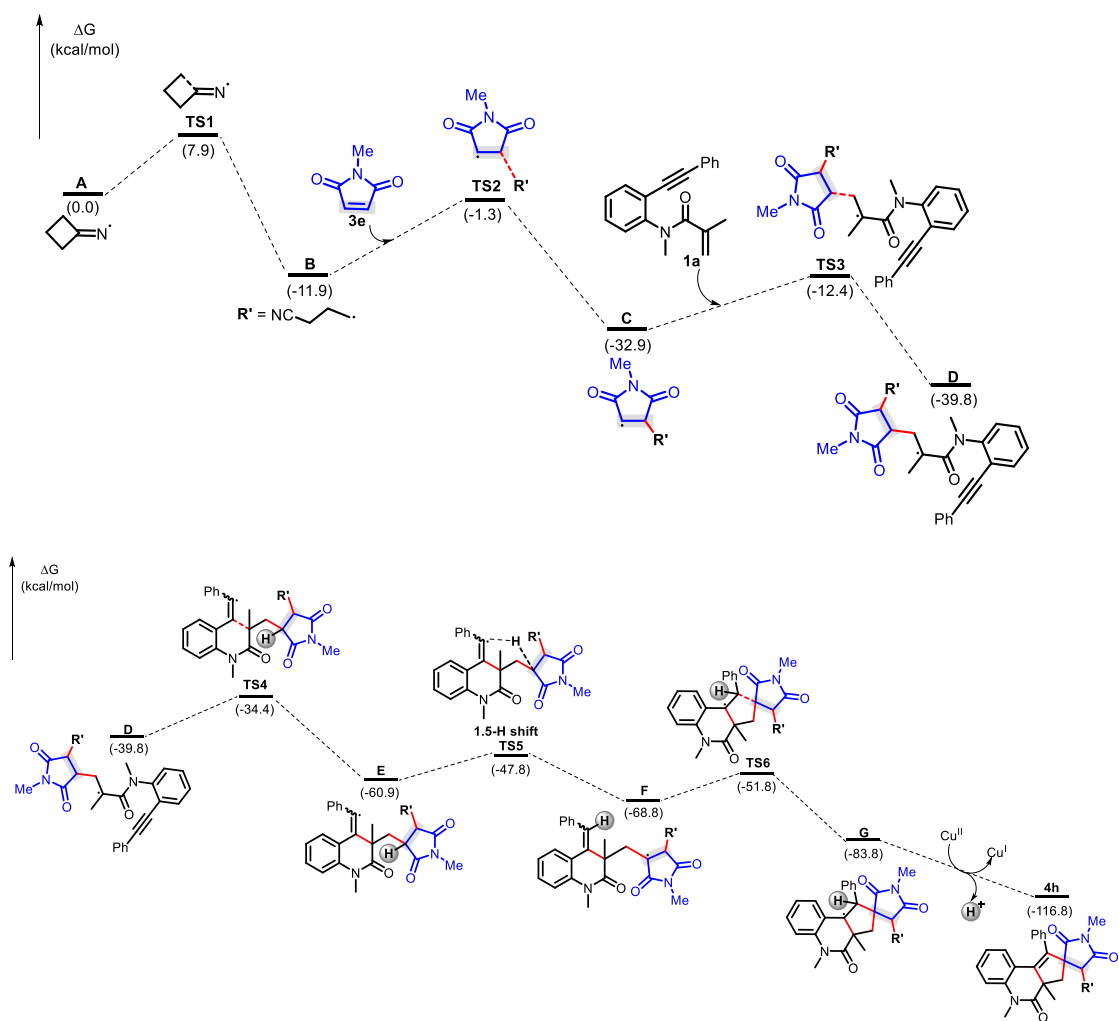

**Figure 1.** Proposed reaction mechanisms with DFT calculations.

**Table 1.** XYZ Coordinates.

| <b>1a</b> |              |              |              |
|-----------|--------------|--------------|--------------|
| 6         | -3.288814000 | -1.424550000 | -0.158393000 |
| 6         | -1.988533000 | -0.921061000 | -0.214086000 |
| 6         | -0.889802000 | -1.773451000 | 0.041249000  |
| 6         | -1.137814000 | -3.133253000 | 0.322067000  |
| 6         | -2.437656000 | -3.624384000 | 0.369274000  |
| 6         | -3.517282000 | -2.767846000 | 0.136121000  |
| 1         | -4.118357000 | -0.749435000 | -0.338987000 |
| 1         | -0.292921000 | -3.787433000 | 0.513002000  |
| 1         | -2.610004000 | -4.673293000 | 0.593547000  |
| 1         | -4.535009000 | -3.145080000 | 0.180287000  |
| 7         | -1.755472000 | 0.448224000  | -0.574541000 |
| 6         | -2.167364000 | 1.434282000  | 0.305304000  |
| 8         | -2.807217000 | 1.172204000  | 1.318888000  |

|           |              |              |              |
|-----------|--------------|--------------|--------------|
| 6         | -1.779083000 | 2.869859000  | 0.037644000  |
| 6         | -0.514560000 | 3.211586000  | -0.237896000 |
| 1         | 0.264557000  | 2.468342000  | -0.382245000 |
| 1         | -0.213215000 | 4.254408000  | -0.304129000 |
| 6         | -2.870828000 | 3.874861000  | 0.301775000  |
| 1         | -3.698023000 | 3.759478000  | -0.411179000 |
| 1         | -3.288143000 | 3.713292000  | 1.300696000  |
| 1         | -2.493405000 | 4.899078000  | 0.228184000  |
| 6         | 0.448772000  | -1.283202000 | 0.038026000  |
| 6         | 1.602419000  | -0.897038000 | 0.056870000  |
| 6         | 2.953532000  | -0.441162000 | 0.085338000  |
| 6         | 3.254723000  | 0.889974000  | 0.438724000  |
| 6         | 4.011405000  | -1.315161000 | -0.237433000 |
| 6         | 4.575550000  | 1.330374000  | 0.463170000  |
| 1         | 2.444727000  | 1.563610000  | 0.701651000  |
| 6         | 5.329184000  | -0.865964000 | -0.210270000 |
| 1         | 3.784651000  | -2.341583000 | -0.508943000 |
| 6         | 5.616549000  | 0.456429000  | 0.138486000  |
| 1         | 4.793825000  | 2.358460000  | 0.739210000  |
| 1         | 6.135093000  | -1.550101000 | -0.461828000 |
| 1         | 6.645973000  | 0.803372000  | 0.159006000  |
| 6         | -1.290361000 | 0.669769000  | -1.947643000 |
| 1         | -1.912810000 | 0.089616000  | -2.638771000 |
| 1         | -1.373298000 | 1.725563000  | -2.200003000 |
| 1         | -0.247835000 | 0.356142000  | -2.068771000 |
| <b>2a</b> |              |              |              |
| 6         | -2.552805000 | 1.288879000  | 0.017073000  |
| 6         | -1.237650000 | 1.742061000  | 0.027463000  |
| 6         | -0.175118000 | 0.829533000  | -0.015890000 |
| 6         | -0.442564000 | -0.545217000 | -0.072698000 |
| 6         | -1.758839000 | -0.999876000 | -0.083283000 |
| 6         | -2.813694000 | -0.083898000 | -0.037932000 |
| 1         | -3.375537000 | 1.995461000  | 0.043451000  |
| 1         | -1.010665000 | 2.801936000  | 0.066129000  |
| 1         | 0.376734000  | -1.253241000 | -0.111763000 |
| 1         | -1.968646000 | -2.063003000 | -0.134883000 |
| 6         | -4.235188000 | -0.580428000 | 0.008847000  |
| 6         | 1.211254000  | 1.394718000  | -0.003402000 |
| 8         | 2.138828000  | 0.388119000  | -0.037341000 |
| 8         | 1.465314000  | 2.573208000  | 0.033671000  |
| 7         | 3.489303000  | 0.871854000  | -0.045092000 |
| 6         | 4.274325000  | -0.126595000 | -0.035266000 |
| 6         | 4.162276000  | -1.638848000 | 0.012029000  |
| 6         | 5.791759000  | -0.139560000 | -0.023103000 |

|   |              |              |              |
|---|--------------|--------------|--------------|
| 6 | 5.720349000  | -1.696402000 | 0.111910000  |
| 1 | 3.735864000  | -2.074450000 | -0.898664000 |
| 1 | 3.603026000  | -2.027040000 | 0.869935000  |
| 1 | 6.241917000  | 0.222028000  | -0.953912000 |
| 1 | 6.250221000  | 0.399008000  | 0.812306000  |
| 1 | 6.212160000  | -2.249688000 | -0.691478000 |
| 1 | 6.085305000  | -2.071539000 | 1.071067000  |
| 9 | -5.094132000 | 0.300048000  | -0.548669000 |
| 9 | -4.646859000 | -0.780869000 | 1.282049000  |
| 9 | -4.378262000 | -1.756876000 | -0.640233000 |

**3e**

|   |              |              |              |
|---|--------------|--------------|--------------|
| 6 | -1.152728000 | -0.190575000 | -0.000067000 |
| 6 | -0.686107000 | -1.620107000 | 0.000065000  |
| 6 | 0.650378000  | -1.635051000 | 0.000041000  |
| 6 | 1.147270000  | -0.215402000 | -0.000052000 |
| 1 | -1.384752000 | -2.446942000 | 0.000096000  |
| 1 | 1.329915000  | -2.477665000 | 0.000060000  |
| 7 | 0.007173000  | 0.591705000  | -0.000479000 |
| 8 | 2.294450000  | 0.182322000  | 0.000112000  |
| 8 | -2.293083000 | 0.226186000  | 0.000111000  |
| 6 | 0.027712000  | 2.042996000  | 0.000123000  |
| 1 | 0.542788000  | 2.419752000  | -0.888449000 |
| 1 | -1.008750000 | 2.384501000  | -0.001064000 |
| 1 | 0.540505000  | 2.419183000  | 0.890277000  |

**4h**

|   |              |              |              |
|---|--------------|--------------|--------------|
| 8 | -1.174384000 | 1.511398000  | 2.736233000  |
| 8 | -4.727985000 | 0.432392000  | 0.075559000  |
| 8 | 1.196545000  | -3.357444000 | 1.023706000  |
| 7 | -3.134560000 | 1.088565000  | 1.603148000  |
| 7 | 2.939860000  | -2.022827000 | 0.370158000  |
| 6 | 0.132053000  | 0.864998000  | 0.079274000  |
| 6 | 0.070756000  | 2.077158000  | -0.778398000 |
| 6 | 1.237032000  | 0.197035000  | 0.472157000  |
| 6 | -1.757859000 | 1.022686000  | 1.786500000  |
| 6 | -0.614649000 | -1.158003000 | 1.173434000  |
| 1 | -1.109388000 | -1.465003000 | 2.099481000  |
| 1 | -0.789242000 | -1.944738000 | 0.439440000  |
| 6 | -1.142387000 | 0.206736000  | 0.625378000  |
| 6 | 0.912686000  | -0.989165000 | 1.352126000  |
| 6 | 2.656289000  | 0.415890000  | 0.188473000  |
| 6 | -2.323989000 | 0.139092000  | -0.398652000 |
| 1 | -2.174216000 | 0.987996000  | -1.081030000 |
| 6 | -3.560309000 | 0.529285000  | 0.401380000  |
| 6 | -0.381086000 | 3.305646000  | -0.263714000 |

|   |              |              |              |
|---|--------------|--------------|--------------|
| 1 | -0.648007000 | 3.378381000  | 0.786737000  |
| 6 | -2.519562000 | -1.096460000 | -1.301698000 |
| 1 | -1.539689000 | -1.402485000 | -1.688960000 |
| 1 | -3.099216000 | -0.764745000 | -2.172065000 |
| 6 | 1.668010000  | -2.235723000 | 0.891522000  |
| 6 | 0.439914000  | 2.011496000  | -2.133038000 |
| 1 | 0.788936000  | 1.067308000  | -2.541573000 |
| 6 | -3.248925000 | -2.305662000 | -0.693373000 |
| 1 | -4.226603000 | -1.989583000 | -0.317856000 |
| 1 | -2.695318000 | -2.727859000 | 0.151147000  |
| 6 | 0.365108000  | 3.141300000  | -2.948172000 |
| 1 | 0.655598000  | 3.070953000  | -3.993010000 |
| 6 | 1.316120000  | -0.732951000 | 2.829266000  |
| 1 | 2.388123000  | -0.528147000 | 2.918365000  |
| 1 | 1.081200000  | -1.615393000 | 3.434303000  |
| 1 | 0.762419000  | 0.127593000  | 3.213515000  |
| 6 | -0.083373000 | 4.356178000  | -2.425358000 |
| 6 | 3.489679000  | -0.733830000 | 0.167591000  |
| 6 | -4.050005000 | 1.692240000  | 2.560043000  |
| 1 | -4.770604000 | 0.947899000  | 2.909917000  |
| 1 | -4.597772000 | 2.513280000  | 2.089142000  |
| 1 | -3.455674000 | 2.065000000  | 3.394829000  |
| 7 | -1.281907000 | -4.335526000 | -2.812948000 |
| 6 | -3.497342000 | -3.421220000 | -1.733300000 |
| 1 | -4.034450000 | -4.255887000 | -1.267202000 |
| 1 | -4.137543000 | -3.044796000 | -2.541641000 |
| 6 | 3.228525000  | 1.675787000  | -0.034231000 |
| 1 | 2.590592000  | 2.551524000  | 0.007728000  |
| 6 | -0.454562000 | 4.434608000  | -1.081414000 |
| 1 | -0.797741000 | 5.377984000  | -0.664922000 |
| 6 | -2.264765000 | -3.943007000 | -2.335695000 |
| 6 | 3.730597000  | -3.206244000 | 0.031781000  |
| 1 | 4.118711000  | -3.121369000 | -0.987769000 |
| 1 | 3.071332000  | -4.069045000 | 0.105814000  |
| 1 | 4.569517000  | -3.334809000 | 0.725952000  |
| 6 | 4.859051000  | -0.581543000 | -0.096133000 |
| 1 | 5.511183000  | -1.446095000 | -0.117114000 |
| 6 | 4.589990000  | 1.817810000  | -0.290698000 |
| 1 | 5.012941000  | 2.804057000  | -0.456651000 |
| 6 | 5.400518000  | 0.683272000  | -0.323723000 |
| 1 | 6.465126000  | 0.775513000  | -0.520447000 |
| 1 | -0.142461000 | 5.235773000  | -3.060595000 |
| A |              |              |              |
| 6 | -0.736288000 | -0.000104000 | 0.000146000  |

|   |              |              |              |
|---|--------------|--------------|--------------|
| 6 | 0.348852000  | 1.107567000  | 0.000073000  |
| 6 | 1.442449000  | -0.000108000 | -0.000140000 |
| 6 | 0.348328000  | -1.107524000 | 0.000074000  |
| 1 | 0.313015000  | 1.743240000  | 0.890152000  |
| 1 | 0.312778000  | 1.743480000  | -0.889825000 |
| 1 | 2.081207000  | -0.000488000 | 0.886703000  |
| 1 | 2.080743000  | -0.000486000 | -0.887318000 |
| 1 | 0.312525000  | -1.742989000 | 0.890284000  |
| 1 | 0.312329000  | -1.743197000 | -0.889977000 |
| 7 | -1.976091000 | 0.000208000  | -0.000133000 |

**B**

|   |              |              |              |
|---|--------------|--------------|--------------|
| 6 | -1.471097000 | 0.134157000  | 0.000452000  |
| 6 | -0.092591000 | 0.632421000  | -0.000242000 |
| 1 | 0.053046000  | 1.268666000  | 0.880476000  |
| 1 | 0.053104000  | 1.268446000  | -0.881124000 |
| 7 | -2.552408000 | -0.288397000 | -0.000114000 |
| 6 | 0.955716000  | -0.526218000 | -0.000144000 |
| 1 | 0.768503000  | -1.150690000 | 0.881690000  |
| 1 | 0.768853000  | -1.150578000 | -0.882135000 |
| 6 | 2.358056000  | -0.019666000 | 0.000156000  |
| 1 | 2.861199000  | 0.229371000  | 0.929171000  |
| 1 | 2.861644000  | 0.229399000  | -0.928617000 |

**C**

|   |              |              |              |
|---|--------------|--------------|--------------|
| 6 | 1.558512000  | -0.999764000 | -0.265791000 |
| 6 | 0.313378000  | -0.163766000 | -0.619071000 |
| 6 | 0.788811000  | 1.234943000  | -0.413205000 |
| 6 | 2.184600000  | 1.237253000  | -0.009567000 |
| 1 | 0.083879000  | -0.349021000 | -1.681748000 |
| 1 | 0.221649000  | 2.145828000  | -0.554651000 |
| 7 | 2.581218000  | -0.119648000 | 0.053246000  |
| 8 | 2.924662000  | 2.176953000  | 0.242287000  |
| 8 | 1.633449000  | -2.212883000 | -0.253256000 |
| 6 | 3.919937000  | -0.529429000 | 0.438505000  |
| 1 | 4.155869000  | -0.152948000 | 1.438183000  |
| 1 | 3.947507000  | -1.619821000 | 0.430369000  |
| 6 | -4.684508000 | 0.160782000  | 0.184807000  |
| 6 | -3.420625000 | -0.459721000 | 0.592826000  |
| 1 | -3.517070000 | -1.547933000 | 0.489563000  |
| 1 | -3.262357000 | -0.256904000 | 1.659676000  |
| 7 | -5.673607000 | 0.664757000  | -0.153905000 |
| 6 | -2.220000000 | 0.050382000  | -0.232807000 |
| 1 | -2.403502000 | -0.153697000 | -1.294972000 |
| 1 | -2.154626000 | 1.139810000  | -0.127168000 |
| 6 | -0.912473000 | -0.613775000 | 0.210455000  |

|   |              |              |              |
|---|--------------|--------------|--------------|
| 1 | -0.985662000 | -1.703381000 | 0.110123000  |
| 1 | -0.724595000 | -0.403387000 | 1.271665000  |
| 1 | 4.654948000  | -0.128307000 | -0.265573000 |

**TS1**

|   |              |              |              |
|---|--------------|--------------|--------------|
| 6 | 0.886209000  | -0.116208000 | 0.021801000  |
| 6 | -0.253632000 | -1.099759000 | 0.106363000  |
| 6 | -1.414895000 | -0.115288000 | -0.164315000 |
| 6 | -0.643836000 | 1.166023000  | 0.106811000  |
| 1 | -0.286951000 | -1.514025000 | 1.120936000  |
| 1 | -0.139627000 | -1.930658000 | -0.598788000 |
| 1 | -2.287415000 | -0.270115000 | 0.478611000  |
| 1 | -1.744524000 | -0.169234000 | -1.206003000 |
| 1 | -0.619718000 | 1.546466000  | 1.125878000  |
| 1 | -0.541188000 | 1.921220000  | -0.667609000 |
| 7 | 2.025192000  | 0.201105000  | -0.096712000 |

**TS2**

|   |              |              |              |
|---|--------------|--------------|--------------|
| 6 | -1.733431000 | -0.967917000 | 0.483029000  |
| 6 | -0.717117000 | -0.135219000 | 1.224206000  |
| 6 | -1.014419000 | 1.175566000  | 1.019679000  |
| 6 | -2.146423000 | 1.263674000  | 0.058217000  |
| 1 | -0.091854000 | -0.564981000 | 1.995231000  |
| 1 | -0.549431000 | 2.055653000  | 1.443862000  |
| 7 | -2.525672000 | -0.061240000 | -0.219972000 |
| 8 | -2.681709000 | 2.250653000  | -0.409577000 |
| 8 | -1.853445000 | -2.178034000 | 0.476125000  |
| 6 | -3.626211000 | -0.426692000 | -1.092510000 |
| 1 | -3.420754000 | -0.123591000 | -2.123918000 |
| 1 | -3.739182000 | -1.510951000 | -1.042416000 |
| 6 | 4.707111000  | 0.232874000  | -0.289992000 |
| 6 | 3.504124000  | -0.482669000 | -0.725105000 |
| 1 | 3.703249000  | -1.560160000 | -0.690983000 |
| 1 | 3.301020000  | -0.227414000 | -1.771780000 |
| 7 | 5.643552000  | 0.811882000  | 0.077781000  |
| 6 | 2.268149000  | -0.135724000 | 0.161008000  |
| 1 | 2.513009000  | -0.382752000 | 1.200650000  |
| 1 | 2.106392000  | 0.947570000  | 0.113029000  |
| 6 | 1.044416000  | -0.867731000 | -0.285236000 |
| 1 | 0.906964000  | -1.910187000 | -0.011708000 |
| 1 | 0.558036000  | -0.555354000 | -1.206094000 |
| 1 | -4.548571000 | 0.059752000  | -0.762691000 |

**TS3**

|   |              |             |              |
|---|--------------|-------------|--------------|
| 6 | -3.436900000 | 1.789870000 | -0.509057000 |
| 6 | -3.407857000 | 0.305423000 | -0.905777000 |
| 6 | -1.936344000 | 0.053086000 | -1.163216000 |

|   |              |              |              |
|---|--------------|--------------|--------------|
| 6 | -1.286373000 | 1.362044000  | -1.299451000 |
| 1 | -3.919992000 | 0.250353000  | -1.883559000 |
| 1 | -1.619239000 | -0.751431000 | -1.813024000 |
| 7 | -2.194158000 | 2.325076000  | -0.824440000 |
| 8 | -0.161853000 | 1.639590000  | -1.700197000 |
| 8 | -4.361885000 | 2.411753000  | -0.021116000 |
| 6 | -1.857851000 | 3.732225000  | -0.685840000 |
| 1 | -1.576124000 | 4.148428000  | -1.657355000 |
| 1 | -2.739085000 | 4.244754000  | -0.297965000 |
| 6 | -7.901349000 | -1.316204000 | 0.776743000  |
| 6 | -6.444377000 | -1.385960000 | 0.923993000  |
| 1 | -6.135576000 | -2.431328000 | 0.791576000  |
| 1 | -6.186836000 | -1.108892000 | 1.954263000  |
| 7 | -9.052598000 | -1.254407000 | 0.642933000  |
| 6 | -5.704044000 | -0.472573000 | -0.075261000 |
| 1 | -6.012278000 | -0.734173000 | -1.095622000 |
| 1 | -5.992459000 | 0.568462000  | 0.092390000  |
| 6 | -4.181167000 | -0.614710000 | 0.058012000  |
| 1 | -3.889431000 | -1.652574000 | -0.145281000 |
| 1 | -3.882531000 | -0.398914000 | 1.091610000  |
| 1 | -1.018316000 | 3.854466000  | 0.004946000  |
| 6 | 3.430716000  | -3.844660000 | -0.513593000 |
| 6 | 3.081466000  | -2.503271000 | -0.349120000 |
| 6 | 4.085279000  | -1.528806000 | -0.153172000 |
| 6 | 5.434054000  | -1.944655000 | -0.143257000 |
| 6 | 5.770777000  | -3.282890000 | -0.310500000 |
| 6 | 4.767381000  | -4.238549000 | -0.492647000 |
| 1 | 2.641800000  | -4.577405000 | -0.645665000 |
| 1 | 6.205779000  | -1.195520000 | 0.002518000  |
| 1 | 6.815158000  | -3.581698000 | -0.296295000 |
| 1 | 5.023900000  | -5.286551000 | -0.618197000 |
| 7 | 1.700843000  | -2.109644000 | -0.403132000 |
| 6 | 0.872325000  | -2.525092000 | 0.614487000  |
| 8 | 1.252498000  | -3.293006000 | 1.496958000  |
| 6 | -0.530969000 | -1.981182000 | 0.738099000  |
| 6 | -0.794522000 | -0.625669000 | 0.684885000  |
| 1 | 0.022687000  | 0.067396000  | 0.513497000  |
| 1 | -1.628782000 | -0.240035000 | 1.263678000  |
| 6 | -1.552483000 | -2.982383000 | 1.202420000  |
| 1 | -1.096149000 | -3.656598000 | 1.932399000  |
| 1 | -2.421845000 | -2.495359000 | 1.652322000  |
| 1 | -1.907441000 | -3.605992000 | 0.367943000  |
| 6 | 3.780272000  | -0.150135000 | 0.046368000  |
| 6 | 3.614008000  | 1.042350000  | 0.223043000  |

|   |             |              |              |
|---|-------------|--------------|--------------|
| 6 | 3.465089000 | 2.443038000  | 0.454339000  |
| 6 | 2.417518000 | 3.173313000  | -0.142664000 |
| 6 | 4.384967000 | 3.117712000  | 1.283408000  |
| 6 | 2.303830000 | 4.542854000  | 0.089430000  |
| 1 | 1.704508000 | 2.665013000  | -0.783879000 |
| 6 | 4.257742000 | 4.485507000  | 1.510589000  |
| 1 | 5.192212000 | 2.556137000  | 1.743633000  |
| 6 | 3.217758000 | 5.203681000  | 0.914437000  |
| 1 | 1.498995000 | 5.099613000  | -0.383923000 |
| 1 | 4.972680000 | 4.992619000  | 2.152917000  |
| 1 | 3.122392000 | 6.271841000  | 1.089963000  |
| 6 | 1.230997000 | -1.482491000 | -1.645072000 |
| 1 | 1.889990000 | -1.800876000 | -2.456874000 |
| 1 | 0.223187000 | -1.836561000 | -1.876031000 |
| 1 | 1.224441000 | -0.390252000 | -1.602418000 |

**D**

|   |              |              |              |
|---|--------------|--------------|--------------|
| 6 | -3.466150000 | -2.627212000 | -0.087703000 |
| 6 | -2.612554000 | -1.591333000 | 0.654286000  |
| 6 | -1.159015000 | -2.123635000 | 0.472249000  |
| 6 | -1.273506000 | -3.126698000 | -0.680392000 |
| 1 | -2.910623000 | -1.600609000 | 1.708302000  |
| 1 | -0.927101000 | -2.751808000 | 1.344508000  |
| 7 | -2.619420000 | -3.408314000 | -0.874583000 |
| 8 | -0.366176000 | -3.644777000 | -1.300727000 |
| 8 | -4.674979000 | -2.748001000 | -0.057109000 |
| 6 | -3.091023000 | -4.425474000 | -1.802884000 |
| 1 | -2.620239000 | -5.385235000 | -1.574582000 |
| 1 | -4.173316000 | -4.497404000 | -1.690081000 |
| 6 | -5.816691000 | 2.320862000  | 0.119791000  |
| 6 | -4.530796000 | 1.723661000  | -0.252073000 |
| 1 | -3.730947000 | 2.424432000  | 0.020937000  |
| 1 | -4.498146000 | 1.625871000  | -1.344847000 |
| 7 | -6.834091000 | 2.787567000  | 0.427204000  |
| 6 | -4.297609000 | 0.349470000  | 0.411624000  |
| 1 | -4.408469000 | 0.449638000  | 1.498484000  |
| 1 | -5.063596000 | -0.356988000 | 0.081273000  |
| 6 | -2.893544000 | -0.179738000 | 0.086064000  |
| 1 | -2.155115000 | 0.518246000  | 0.497088000  |
| 1 | -2.737934000 | -0.185047000 | -1.002487000 |
| 1 | -2.837276000 | -4.146820000 | -2.829657000 |
| 6 | 5.409538000  | -1.285291000 | 0.100078000  |
| 6 | 4.202273000  | -0.575270000 | 0.082941000  |
| 6 | 4.180092000  | 0.717417000  | -0.513446000 |
| 6 | 5.369748000  | 1.246031000  | -1.046342000 |



|   |              |              |              |
|---|--------------|--------------|--------------|
| 6 | 6.560033000  | 0.525964000  | -1.017071000 |
| 6 | 6.574538000  | -0.745651000 | -0.444511000 |
| 1 | 5.447068000  | -2.268922000 | 0.554462000  |
| 1 | 5.335858000  | 2.234540000  | -1.493639000 |
| 1 | 7.464769000  | 0.952377000  | -1.440049000 |
| 1 | 7.494905000  | -1.322112000 | -0.411014000 |
| 7 | 3.002655000  | -1.161862000 | 0.559694000  |
| 6 | 2.196664000  | -0.443451000 | 1.478750000  |
| 8 | 2.659943000  | 0.452984000  | 2.184830000  |
| 6 | 0.760931000  | -0.749164000 | 1.513076000  |
| 6 | 0.022581000  | -1.148590000 | 0.262998000  |
| 1 | 0.709991000  | -1.600060000 | -0.455322000 |
| 1 | -0.334976000 | -0.231223000 | -0.229296000 |
| 6 | -0.003752000 | -0.294189000 | 2.716707000  |
| 1 | 0.671045000  | -0.059928000 | 3.542097000  |
| 1 | -0.582517000 | 0.617657000  | 2.497414000  |
| 1 | -0.728398000 | -1.050669000 | 3.047769000  |
| 6 | 2.982892000  | 1.483575000  | -0.599329000 |
| 6 | 1.974241000  | 2.160411000  | -0.656564000 |
| 6 | 0.784362000  | 2.945511000  | -0.583322000 |
| 6 | 0.184501000  | 3.490447000  | -1.735347000 |
| 6 | 0.195071000  | 3.190999000  | 0.675636000  |
| 6 | -0.972648000 | 4.259729000  | -1.629368000 |
| 1 | 0.636848000  | 3.306743000  | -2.705134000 |
| 6 | -0.961606000 | 3.962360000  | 0.771893000  |
| 1 | 0.672040000  | 2.781592000  | 1.561160000  |
| 6 | -1.549414000 | 4.499806000  | -0.378582000 |
| 1 | -1.422678000 | 4.679725000  | -2.524909000 |
| 1 | -1.397493000 | 4.158795000  | 1.748058000  |
| 1 | -2.443182000 | 5.112950000  | -0.299049000 |
| 6 | 2.913776000  | -2.624271000 | 0.554936000  |
| 1 | 3.545487000  | -3.079081000 | 1.330999000  |
| 1 | 1.886247000  | -2.934972000 | 0.742150000  |
| 1 | 3.215832000  | -3.012736000 | -0.421370000 |

**TS4**

|   |              |              |              |
|---|--------------|--------------|--------------|
| 6 | -4.114953000 | -0.983826000 | 0.476397000  |
| 6 | -2.835905000 | -0.166344000 | 0.693394000  |
| 6 | -1.705642000 | -1.220766000 | 0.505649000  |
| 6 | -2.390532000 | -2.363653000 | -0.254027000 |
| 1 | -2.849047000 | 0.227517000  | 1.714985000  |
| 1 | -1.494878000 | -1.649815000 | 1.496429000  |
| 7 | -3.767532000 | -2.183094000 | -0.137115000 |
| 8 | -1.860874000 | -3.297240000 | -0.821248000 |
| 8 | -5.259822000 | -0.659194000 | 0.726070000  |

|   |              |              |              |
|---|--------------|--------------|--------------|
| 6 | -4.753306000 | -3.147777000 | -0.600828000 |
| 1 | -5.352680000 | -3.505955000 | 0.240796000  |
| 1 | -5.421085000 | -2.682608000 | -1.331145000 |
| 6 | -4.806298000 | 4.300378000  | -0.719437000 |
| 6 | -3.832195000 | 3.242703000  | -1.005439000 |
| 1 | -2.831499000 | 3.694040000  | -1.025365000 |
| 1 | -4.025107000 | 2.860608000  | -2.016271000 |
| 7 | -5.578999000 | 5.132941000  | -0.480835000 |
| 6 | -3.883902000 | 2.090468000  | 0.020335000  |
| 1 | -3.716678000 | 2.496933000  | 1.025354000  |
| 1 | -4.881510000 | 1.643476000  | 0.025694000  |
| 6 | -2.818323000 | 1.029036000  | -0.289042000 |
| 1 | -1.829763000 | 1.498817000  | -0.246798000 |
| 1 | -2.943295000 | 0.660916000  | -1.317932000 |
| 1 | -4.212260000 | -3.976155000 | -1.059539000 |
| 6 | 2.489120000  | -3.816245000 | -0.637722000 |
| 6 | 2.350566000  | -2.533087000 | -0.085122000 |
| 6 | 2.666336000  | -1.408432000 | -0.890655000 |
| 6 | 3.094033000  | -1.613521000 | -2.214523000 |
| 6 | 3.228302000  | -2.891896000 | -2.746370000 |
| 6 | 2.923337000  | -3.995518000 | -1.949062000 |
| 1 | 2.238218000  | -4.683939000 | -0.038657000 |
| 1 | 3.328867000  | -0.739733000 | -2.814185000 |
| 1 | 3.565614000  | -3.023210000 | -3.770113000 |
| 1 | 3.012658000  | -5.002457000 | -2.346721000 |
| 7 | 1.960507000  | -2.398505000 | 1.266469000  |
| 6 | 1.309381000  | -1.280826000 | 1.797904000  |
| 8 | 1.238737000  | -1.113305000 | 3.017764000  |
| 6 | 0.663083000  | -0.317691000 | 0.874241000  |
| 6 | -0.341733000 | -0.841242000 | -0.132430000 |
| 1 | 0.024407000  | -1.752733000 | -0.610627000 |
| 1 | -0.487248000 | -0.105732000 | -0.931486000 |
| 6 | 0.416007000  | 1.040750000  | 1.468424000  |
| 1 | -0.477028000 | 1.038408000  | 2.110386000  |
| 1 | 1.251336000  | 1.358562000  | 2.095564000  |
| 1 | 0.266833000  | 1.789081000  | 0.682508000  |
| 6 | 2.569298000  | -0.057005000 | -0.400265000 |
| 6 | 2.925126000  | 1.127449000  | -0.366498000 |
| 6 | 3.221704000  | 2.500822000  | -0.204658000 |
| 6 | 2.804376000  | 3.448636000  | -1.168706000 |
| 6 | 3.955929000  | 2.953366000  | 0.917113000  |
| 6 | 3.107079000  | 4.796714000  | -1.008333000 |
| 1 | 2.246762000  | 3.108633000  | -2.036243000 |
| 6 | 4.251166000  | 4.304305000  | 1.066086000  |

|   |             |              |              |
|---|-------------|--------------|--------------|
| 1 | 4.284179000 | 2.231363000  | 1.658337000  |
| 6 | 3.829445000 | 5.231559000  | 0.107581000  |
| 1 | 2.779571000 | 5.513284000  | -1.756749000 |
| 1 | 4.813535000 | 4.637427000  | 1.934069000  |
| 1 | 4.063253000 | 6.285461000  | 0.228645000  |
| 6 | 2.353363000 | -3.447152000 | 2.212386000  |
| 1 | 3.371471000 | -3.781231000 | 1.994551000  |
| 1 | 2.307563000 | -3.020450000 | 3.213020000  |
| 1 | 1.676477000 | -4.309230000 | 2.162809000  |

**E**

|   |              |              |              |
|---|--------------|--------------|--------------|
| 6 | -4.026227000 | -1.391436000 | 0.126693000  |
| 6 | -2.850745000 | -0.499337000 | 0.544277000  |
| 6 | -1.604920000 | -1.401682000 | 0.291230000  |
| 6 | -2.130019000 | -2.495895000 | -0.642714000 |
| 1 | -2.963104000 | -0.271462000 | 1.609548000  |
| 1 | -1.396036000 | -1.930332000 | 1.231800000  |
| 7 | -3.520107000 | -2.467030000 | -0.599300000 |
| 8 | -1.484501000 | -3.298490000 | -1.286765000 |
| 8 | -5.209441000 | -1.199735000 | 0.332222000  |
| 6 | -4.353897000 | -3.463955000 | -1.253237000 |
| 1 | -4.097882000 | -4.462797000 | -0.889685000 |
| 1 | -5.392568000 | -3.230607000 | -1.016477000 |
| 6 | -5.194795000 | 3.929260000  | -0.315869000 |
| 6 | -4.097596000 | 3.028774000  | -0.682821000 |
| 1 | -3.151214000 | 3.569736000  | -0.551311000 |
| 1 | -4.183042000 | 2.799958000  | -1.753045000 |
| 7 | -6.065289000 | 4.635303000  | -0.014327000 |
| 6 | -4.093700000 | 1.725025000  | 0.143602000  |
| 1 | -4.035504000 | 1.976000000  | 1.209835000  |
| 1 | -5.036588000 | 1.191501000  | -0.000909000 |
| 6 | -2.904464000 | 0.832751000  | -0.240445000 |
| 1 | -1.976715000 | 1.384422000  | -0.050405000 |
| 1 | -2.925318000 | 0.624086000  | -1.320197000 |
| 1 | -4.197414000 | -3.435563000 | -2.335359000 |
| 6 | 3.639976000  | -3.203587000 | -0.635703000 |
| 6 | 2.850051000  | -2.225496000 | -0.012005000 |
| 6 | 2.847833000  | -0.909397000 | -0.522480000 |
| 6 | 3.637685000  | -0.610135000 | -1.638906000 |
| 6 | 4.425436000  | -1.580744000 | -2.251290000 |
| 6 | 4.419721000  | -2.880953000 | -1.745134000 |
| 1 | 3.646287000  | -4.220835000 | -0.264175000 |
| 1 | 3.620959000  | 0.405967000  | -2.022750000 |
| 1 | 5.028921000  | -1.327474000 | -3.117787000 |
| 1 | 5.019695000  | -3.655482000 | -2.214465000 |

|   |              |              |              |
|---|--------------|--------------|--------------|
| 7 | 2.090825000  | -2.539412000 | 1.139971000  |
| 6 | 1.113090000  | -1.707775000 | 1.655563000  |
| 8 | 0.480361000  | -2.011406000 | 2.664268000  |
| 6 | 0.773084000  | -0.421922000 | 0.880247000  |
| 6 | -0.276857000 | -0.809783000 | -0.219961000 |
| 1 | 0.173186000  | -1.556620000 | -0.882542000 |
| 1 | -0.450373000 | 0.080549000  | -0.833039000 |
| 6 | 0.206839000  | 0.611446000  | 1.864235000  |
| 1 | -0.652704000 | 0.208283000  | 2.401706000  |
| 1 | 0.959876000  | 0.889765000  | 2.607634000  |
| 1 | -0.089201000 | 1.520375000  | 1.331537000  |
| 6 | 2.019501000  | 0.117363000  | 0.155569000  |
| 6 | 2.302242000  | 1.398468000  | 0.106669000  |
| 6 | 2.640363000  | 2.729015000  | 0.041294000  |
| 6 | 2.154308000  | 3.569262000  | -1.016010000 |
| 6 | 3.486228000  | 3.331213000  | 1.031839000  |
| 6 | 2.496683000  | 4.909828000  | -1.066673000 |
| 1 | 1.514266000  | 3.132600000  | -1.776876000 |
| 6 | 3.814167000  | 4.674048000  | 0.956899000  |
| 1 | 3.864629000  | 2.712260000  | 1.839305000  |
| 6 | 3.326206000  | 5.476608000  | -0.086434000 |
| 1 | 2.118018000  | 5.527707000  | -1.876810000 |
| 1 | 4.457185000  | 5.109376000  | 1.717366000  |
| 1 | 3.588855000  | 6.529117000  | -0.134987000 |
| 6 | 2.316882000  | -3.815002000 | 1.821164000  |
| 1 | 3.383384000  | -3.945384000 | 2.027886000  |
| 1 | 1.757469000  | -3.792367000 | 2.753871000  |
| 1 | 1.963110000  | -4.653497000 | 1.210509000  |

**TS5**

|   |              |              |              |
|---|--------------|--------------|--------------|
| 6 | -3.206647000 | 1.135691000  | 0.898860000  |
| 6 | -2.450816000 | 0.093125000  | 0.069004000  |
| 6 | -1.186091000 | -0.178311000 | 0.904926000  |
| 6 | -1.486820000 | 0.358626000  | 2.269105000  |
| 1 | -2.200823000 | 0.534208000  | -0.904457000 |
| 1 | -0.309560000 | 0.619229000  | 0.451988000  |
| 7 | -2.622012000 | 1.174435000  | 2.158459000  |
| 8 | -0.877349000 | 0.210537000  | 3.316130000  |
| 8 | -4.175659000 | 1.791107000  | 0.562934000  |
| 6 | -3.128508000 | 1.972001000  | 3.262713000  |
| 1 | -2.356502000 | 2.662233000  | 3.614707000  |
| 1 | -3.992902000 | 2.527850000  | 2.897337000  |
| 6 | -6.480582000 | -1.890326000 | -2.305806000 |
| 6 | -5.404468000 | -2.103710000 | -1.333221000 |
| 1 | -4.807352000 | -2.963525000 | -1.664284000 |

|   |              |              |              |
|---|--------------|--------------|--------------|
| 1 | -5.856703000 | -2.386061000 | -0.373801000 |
| 7 | -7.324672000 | -1.708749000 | -3.081581000 |
| 6 | -4.507707000 | -0.859931000 | -1.155928000 |
| 1 | -4.095517000 | -0.572648000 | -2.131223000 |
| 1 | -5.108483000 | -0.015475000 | -0.807332000 |
| 6 | -3.360703000 | -1.139523000 | -0.174868000 |
| 1 | -2.745708000 | -1.958475000 | -0.566446000 |
| 1 | -3.763276000 | -1.488379000 | 0.786761000  |
| 1 | -3.419832000 | 1.324323000  | 4.094639000  |
| 6 | 5.150398000  | -1.536319000 | -0.559593000 |
| 6 | 3.770386000  | -1.461620000 | -0.316500000 |
| 6 | 3.176576000  | -0.204420000 | -0.056602000 |
| 6 | 3.992132000  | 0.934452000  | -0.026494000 |
| 6 | 5.361522000  | 0.855728000  | -0.266918000 |
| 6 | 5.936693000  | -0.385603000 | -0.536502000 |
| 1 | 5.618974000  | -2.492181000 | -0.759235000 |
| 1 | 3.538356000  | 1.893335000  | 0.197790000  |
| 1 | 5.971791000  | 1.753297000  | -0.235909000 |
| 1 | 7.003805000  | -0.468292000 | -0.722992000 |
| 7 | 2.971581000  | -2.625189000 | -0.362582000 |
| 6 | 1.670411000  | -2.666507000 | 0.114059000  |
| 8 | 0.991121000  | -3.682583000 | 0.030430000  |
| 6 | 1.130600000  | -1.409105000 | 0.828258000  |
| 6 | -0.425875000 | -1.488938000 | 0.737595000  |
| 1 | -0.769633000 | -2.240430000 | 1.455564000  |
| 1 | -0.666552000 | -1.888110000 | -0.251144000 |
| 6 | 1.618293000  | -1.521219000 | 2.302744000  |
| 1 | 1.317895000  | -2.490141000 | 2.716045000  |
| 1 | 2.707449000  | -1.438503000 | 2.368374000  |
| 1 | 1.158229000  | -0.734272000 | 2.903380000  |
| 6 | 1.715021000  | -0.145242000 | 0.188600000  |
| 6 | 0.965144000  | 0.927724000  | -0.067226000 |
| 6 | 1.063709000  | 2.220570000  | -0.694975000 |
| 6 | 1.203474000  | 2.332364000  | -2.098321000 |
| 6 | 0.939901000  | 3.407372000  | 0.064373000  |
| 6 | 1.243516000  | 3.582343000  | -2.708419000 |
| 1 | 1.287981000  | 1.427430000  | -2.692637000 |
| 6 | 0.979615000  | 4.652928000  | -0.555090000 |
| 1 | 0.819526000  | 3.335037000  | 1.141900000  |
| 6 | 1.131507000  | 4.747279000  | -1.942399000 |
| 1 | 1.360576000  | 3.650017000  | -3.786704000 |
| 1 | 0.889854000  | 5.554714000  | 0.044550000  |
| 1 | 1.157832000  | 5.721009000  | -2.423227000 |
| 6 | 3.525212000  | -3.860013000 | -0.918095000 |

|          |              |              |              |
|----------|--------------|--------------|--------------|
| 1        | 4.300264000  | -4.274913000 | -0.263163000 |
| 1        | 2.709397000  | -4.575127000 | -1.000615000 |
| 1        | 3.956379000  | -3.668607000 | -1.905572000 |
| <b>F</b> |              |              |              |
| 6        | 3.431893000  | 1.635771000  | 1.095258000  |
| 6        | 2.444502000  | 0.807835000  | 0.255387000  |
| 6        | 1.443724000  | 1.829512000  | -0.212613000 |
| 6        | 1.864024000  | 3.144121000  | 0.259850000  |
| 1        | 1.977349000  | 0.066336000  | 0.921179000  |
| 1        | 0.425380000  | -0.801657000 | -0.482112000 |
| 7        | 3.029967000  | 2.958641000  | 1.034080000  |
| 8        | 1.352203000  | 4.239411000  | 0.062212000  |
| 8        | 4.408520000  | 1.225107000  | 1.696536000  |
| 6        | 3.727565000  | 4.054962000  | 1.682066000  |
| 1        | 3.054381000  | 4.574124000  | 2.370372000  |
| 1        | 4.573102000  | 3.633200000  | 2.226882000  |
| 6        | 5.536169000  | -2.987774000 | -1.106432000 |
| 6        | 4.765996000  | -1.820537000 | -1.546697000 |
| 1        | 4.056199000  | -2.148317000 | -2.317569000 |
| 1        | 5.452840000  | -1.113988000 | -2.029953000 |
| 7        | 6.135215000  | -3.912820000 | -0.742270000 |
| 6        | 4.021399000  | -1.131420000 | -0.383806000 |
| 1        | 3.375292000  | -1.866924000 | 0.111856000  |
| 1        | 4.738196000  | -0.781946000 | 0.363894000  |
| 6        | 3.173217000  | 0.044858000  | -0.884925000 |
| 1        | 2.421823000  | -0.322230000 | -1.596295000 |
| 1        | 3.800269000  | 0.755286000  | -1.440222000 |
| 1        | 4.080376000  | 4.772716000  | 0.935445000  |
| 6        | -5.164291000 | 0.481694000  | 0.358900000  |
| 6        | -3.843937000 | 0.578871000  | -0.101763000 |
| 6        | -2.822520000 | -0.164527000 | 0.530358000  |
| 6        | -3.145525000 | -0.942115000 | 1.648934000  |
| 6        | -4.456589000 | -1.030029000 | 2.113533000  |
| 6        | -5.465014000 | -0.323255000 | 1.457808000  |
| 1        | -5.956127000 | 1.042229000  | -0.124037000 |
| 1        | -2.352621000 | -1.484512000 | 2.153060000  |
| 1        | -4.686363000 | -1.641525000 | 2.980913000  |
| 1        | -6.492124000 | -0.382787000 | 1.806883000  |
| 7        | -3.512588000 | 1.396582000  | -1.205131000 |
| 6        | -2.219525000 | 1.838868000  | -1.443565000 |
| 8        | -1.958978000 | 2.556476000  | -2.399259000 |
| 6        | -1.137061000 | 1.419819000  | -0.401959000 |
| 6        | 0.250962000  | 1.655880000  | -1.091011000 |
| 1        | 0.126568000  | 2.580914000  | -1.661251000 |

|   |              |              |              |
|---|--------------|--------------|--------------|
| 1 | 0.420103000  | 0.855866000  | -1.820910000 |
| 6 | -1.290155000 | 2.383651000  | 0.809685000  |
| 1 | -1.048960000 | 3.405997000  | 0.507630000  |
| 1 | -2.302725000 | 2.361686000  | 1.219299000  |
| 1 | -0.602061000 | 2.088515000  | 1.608962000  |
| 6 | -1.445495000 | -0.023025000 | 0.004306000  |
| 6 | -0.577288000 | -1.046372000 | -0.146169000 |
| 6 | -0.786087000 | -2.498394000 | 0.048709000  |
| 6 | -1.943892000 | -3.164717000 | -0.391901000 |
| 6 | 0.244773000  | -3.268036000 | 0.617054000  |
| 6 | -2.070923000 | -4.544766000 | -0.246674000 |
| 1 | -2.739193000 | -2.596266000 | -0.862535000 |
| 6 | 0.115269000  | -4.648084000 | 0.770265000  |
| 1 | 1.153805000  | -2.774504000 | 0.954450000  |
| 6 | -1.045984000 | -5.292270000 | 0.339675000  |
| 1 | -2.971326000 | -5.040049000 | -0.600463000 |
| 1 | 0.923209000  | -5.218954000 | 1.219813000  |
| 1 | -1.147625000 | -6.368360000 | 0.450108000  |
| 6 | -4.568520000 | 1.870375000  | -2.099369000 |
| 1 | -5.183801000 | 2.639611000  | -1.617291000 |
| 1 | -4.089847000 | 2.302013000  | -2.976156000 |
| 1 | -5.208348000 | 1.033370000  | -2.394022000 |

**TS6**

|   |              |             |              |
|---|--------------|-------------|--------------|
| 6 | -0.890405000 | 2.780854000 | -0.197026000 |
| 6 | -1.242533000 | 1.308211000 | 0.060028000  |
| 6 | -0.056832000 | 0.811284000 | 0.868465000  |
| 6 | 0.689907000  | 1.987588000 | 1.319766000  |
| 1 | -1.349431000 | 0.790644000 | -0.901288000 |
| 1 | 0.764477000  | 0.201859000 | -1.755332000 |
| 7 | 0.177295000  | 3.102810000 | 0.622656000  |
| 8 | 1.598799000  | 2.069547000 | 2.134371000  |
| 8 | -1.456222000 | 3.554874000 | -0.950276000 |
| 6 | 0.745785000  | 4.433454000 | 0.743847000  |
| 1 | 0.655158000  | 4.790300000 | 1.774077000  |
| 1 | 1.805438000  | 4.411801000 | 0.474670000  |
| 6 | -6.297227000 | 1.788037000 | -0.164635000 |
| 6 | -5.129650000 | 1.522572000 | 0.681446000  |
| 1 | -5.262428000 | 0.538313000 | 1.149712000  |
| 1 | -5.117200000 | 2.258780000 | 1.495342000  |
| 7 | -7.212759000 | 1.993353000 | -0.847942000 |
| 6 | -3.802189000 | 1.571980000 | -0.104502000 |
| 1 | -3.853299000 | 0.864294000 | -0.941237000 |
| 1 | -3.664891000 | 2.565660000 | -0.539789000 |
| 6 | -2.610084000 | 1.218699000 | 0.795551000  |

|          |              |              |              |
|----------|--------------|--------------|--------------|
| 1        | -2.737037000 | 0.196953000  | 1.175160000  |
| 1        | -2.590248000 | 1.876241000  | 1.675741000  |
| 1        | 0.195685000  | 5.090964000  | 0.069106000  |
| 6        | -1.197126000 | -4.221458000 | -1.205028000 |
| 6        | -0.375743000 | -3.366464000 | -0.452390000 |
| 6        | 0.244253000  | -2.244714000 | -1.082906000 |
| 6        | 0.077153000  | -2.117667000 | -2.485972000 |
| 6        | -0.730307000 | -2.971545000 | -3.220224000 |
| 6        | -1.385507000 | -4.020606000 | -2.569703000 |
| 1        | -1.693484000 | -5.056350000 | -0.728050000 |
| 1        | 0.619739000  | -1.337702000 | -3.007306000 |
| 1        | -0.836299000 | -2.832687000 | -4.291790000 |
| 1        | -2.024598000 | -4.701128000 | -3.124829000 |
| 7        | -0.147197000 | -3.639376000 | 0.905028000  |
| 6        | 0.655436000  | -2.845522000 | 1.717584000  |
| 8        | 0.918793000  | -3.188137000 | 2.862638000  |
| 6        | 1.099210000  | -1.473982000 | 1.190156000  |
| 6        | -0.039714000 | -0.464349000 | 1.662493000  |
| 1        | 0.114310000  | -0.260578000 | 2.728162000  |
| 1        | -1.007051000 | -0.968241000 | 1.559526000  |
| 6        | 2.420199000  | -1.118256000 | 1.897163000  |
| 1        | 2.292192000  | -1.286140000 | 2.967444000  |
| 1        | 3.231638000  | -1.769347000 | 1.557189000  |
| 1        | 2.690902000  | -0.075984000 | 1.741146000  |
| 6        | 1.055491000  | -1.313308000 | -0.326663000 |
| 6        | 1.373630000  | -0.058209000 | -0.890203000 |
| 6        | 2.622499000  | 0.727769000  | -0.895769000 |
| 6        | 3.882753000  | 0.187134000  | -0.577992000 |
| 6        | 2.588586000  | 2.039824000  | -1.415044000 |
| 6        | 5.044740000  | 0.946414000  | -0.706674000 |
| 1        | 3.955248000  | -0.846513000 | -0.263138000 |
| 6        | 3.748243000  | 2.798936000  | -1.541973000 |
| 1        | 1.638133000  | 2.462370000  | -1.730465000 |
| 6        | 4.984550000  | 2.259268000  | -1.175952000 |
| 1        | 6.003346000  | 0.501449000  | -0.453777000 |
| 1        | 3.689703000  | 3.807497000  | -1.942713000 |
| 1        | 5.892074000  | 2.847403000  | -1.279355000 |
| 6        | -0.677015000 | -4.871062000 | 1.494602000  |
| 1        | -0.323479000 | -5.746024000 | 0.939429000  |
| 1        | -0.317317000 | -4.919314000 | 2.519658000  |
| 1        | -1.772232000 | -4.861596000 | 1.489971000  |
| <b>G</b> |              |              |              |
| 6        | 3.194234000  | 0.540323000  | -1.229387000 |
| 6        | 2.245574000  | -0.055325000 | -0.193362000 |



|   |              |              |              |
|---|--------------|--------------|--------------|
| 6 | 0.817476000  | 0.209442000  | -0.765097000 |
| 6 | 1.078401000  | 1.336830000  | -1.780848000 |
| 1 | 2.357249000  | 0.599939000  | 0.684643000  |
| 1 | 0.113219000  | -0.043340000 | 1.242933000  |
| 7 | 2.445785000  | 1.404618000  | -2.023022000 |
| 8 | 0.273415000  | 2.029571000  | -2.375244000 |
| 8 | 4.388858000  | 0.351331000  | -1.352589000 |
| 6 | 3.019892000  | 2.264671000  | -3.047310000 |
| 1 | 2.835576000  | 3.314304000  | -2.802400000 |
| 1 | 4.091796000  | 2.066667000  | -3.079066000 |
| 6 | 5.346381000  | -3.083135000 | 2.424208000  |
| 6 | 4.195719000  | -2.998770000 | 1.519680000  |
| 1 | 3.337141000  | -3.475966000 | 2.010387000  |
| 1 | 4.415168000  | -3.591591000 | 0.622598000  |
| 7 | 6.254524000  | -3.131558000 | 3.145462000  |
| 6 | 3.855471000  | -1.545516000 | 1.127798000  |
| 1 | 3.687389000  | -0.958712000 | 2.040025000  |
| 1 | 4.704430000  | -1.096225000 | 0.606245000  |
| 6 | 2.607763000  | -1.485306000 | 0.234016000  |
| 1 | 1.756972000  | -1.918547000 | 0.778273000  |
| 1 | 2.761870000  | -2.111673000 | -0.653642000 |
| 1 | 2.565111000  | 2.046820000  | -4.017316000 |
| 6 | -4.865967000 | -1.366539000 | 0.972375000  |
| 6 | -3.634538000 | -1.269248000 | 0.317971000  |
| 6 | -2.727920000 | -0.203519000 | 0.657713000  |
| 6 | -3.092655000 | 0.648078000  | 1.736064000  |
| 6 | -4.309738000 | 0.521045000  | 2.387288000  |
| 6 | -5.209968000 | -0.473501000 | 1.990553000  |
| 1 | -5.562217000 | -2.153532000 | 0.709421000  |
| 1 | -2.408738000 | 1.436178000  | 2.026474000  |
| 1 | -4.564649000 | 1.201542000  | 3.194601000  |
| 1 | -6.174379000 | -0.571154000 | 2.480459000  |
| 7 | -3.231622000 | -2.272268000 | -0.592295000 |
| 6 | -2.032884000 | -2.219572000 | -1.292233000 |
| 8 | -1.579649000 | -3.188038000 | -1.890287000 |
| 6 | -1.362135000 | -0.848759000 | -1.360831000 |
| 6 | 0.170140000  | -0.988163000 | -1.531619000 |
| 1 | 0.468535000  | -1.024218000 | -2.583594000 |
| 1 | 0.486670000  | -1.934082000 | -1.086765000 |
| 6 | -2.041983000 | -0.128412000 | -2.568305000 |
| 1 | -1.914589000 | -0.733270000 | -3.473540000 |
| 1 | -3.113204000 | -0.000783000 | -2.382368000 |
| 1 | -1.589160000 | 0.851373000  | -2.726022000 |
| 6 | -1.525862000 | -0.078656000 | -0.078994000 |

|   |              |              |              |
|---|--------------|--------------|--------------|
| 6 | -0.223572000 | 0.548419000  | 0.373600000  |
| 6 | -0.222600000 | 1.999128000  | 0.848856000  |
| 6 | -0.948539000 | 3.004859000  | 0.191815000  |
| 6 | 0.529451000  | 2.352137000  | 1.979531000  |
| 6 | -0.908082000 | 4.322241000  | 0.646493000  |
| 1 | -1.542602000 | 2.752063000  | -0.678879000 |
| 6 | 0.577238000  | 3.672697000  | 2.432527000  |
| 1 | 1.070192000  | 1.581497000  | 2.525564000  |
| 6 | -0.142105000 | 4.663380000  | 1.764592000  |
| 1 | -1.478463000 | 5.085790000  | 0.124354000  |
| 1 | 1.166866000  | 3.920705000  | 3.311028000  |
| 1 | -0.113925000 | 5.691288000  | 2.115790000  |
| 6 | -4.007809000 | -3.508698000 | -0.689672000 |
| 1 | -4.995721000 | -3.312544000 | -1.120428000 |
| 1 | -3.457080000 | -4.187689000 | -1.337686000 |
| 1 | -4.133558000 | -3.964072000 | 0.298338000  |

**TS7**

|   |              |              |              |
|---|--------------|--------------|--------------|
| 6 | -4.575570000 | -1.842847000 | -1.516377000 |
| 6 | -3.591181000 | -2.893637000 | -1.240003000 |
| 1 | -3.218602000 | -3.286600000 | -2.193421000 |
| 1 | -4.092112000 | -3.722287000 | -0.725770000 |
| 7 | -5.324467000 | -0.977174000 | -1.711918000 |
| 6 | -2.408173000 | -2.358050000 | -0.376538000 |
| 1 | -1.962482000 | -1.505724000 | -0.901408000 |
| 1 | -2.822364000 | -1.968274000 | 0.561134000  |
| 6 | -1.370484000 | -3.403081000 | -0.102716000 |
| 1 | -0.704889000 | -3.689088000 | -0.913688000 |
| 1 | -1.638664000 | -4.222221000 | 0.561487000  |
| 6 | 4.252886000  | 0.279955000  | -0.806315000 |
| 6 | 2.892839000  | 0.411962000  | -0.517840000 |
| 6 | 2.301722000  | 1.696879000  | -0.480367000 |
| 6 | 3.107538000  | 2.822012000  | -0.750834000 |
| 6 | 4.460679000  | 2.677751000  | -1.036609000 |
| 6 | 5.036181000  | 1.404752000  | -1.060623000 |
| 1 | 4.692586000  | -0.710484000 | -0.811687000 |
| 1 | 2.650168000  | 3.806079000  | -0.725333000 |
| 1 | 5.066459000  | 3.556844000  | -1.237758000 |
| 1 | 6.093808000  | 1.286005000  | -1.278482000 |
| 7 | 2.077462000  | -0.743999000 | -0.281549000 |
| 6 | 2.396807000  | -1.580125000 | 0.780713000  |
| 8 | 3.444794000  | -1.454485000 | 1.409697000  |
| 6 | 1.398695000  | -2.598332000 | 1.258981000  |
| 6 | 0.071389000  | -2.295521000 | 1.403287000  |
| 1 | -0.299832000 | -1.310766000 | 1.135418000  |

|            |              |              |              |
|------------|--------------|--------------|--------------|
| 1          | -0.522620000 | -2.851058000 | 2.122319000  |
| 6          | 1.992689000  | -3.868951000 | 1.805843000  |
| 1          | 2.822971000  | -3.635272000 | 2.479418000  |
| 1          | 1.244066000  | -4.458139000 | 2.344478000  |
| 1          | 2.403971000  | -4.496311000 | 1.002245000  |
| 6          | 0.921900000  | 1.882470000  | -0.163213000 |
| 6          | -0.249032000 | 2.093195000  | 0.092963000  |
| 6          | -1.618797000 | 2.344210000  | 0.412748000  |
| 6          | -2.654098000 | 1.689893000  | -0.284397000 |
| 6          | -1.957691000 | 3.253085000  | 1.435250000  |
| 6          | -3.988584000 | 1.929409000  | 0.036151000  |
| 1          | -2.403284000 | 1.000833000  | -1.085113000 |
| 6          | -3.293691000 | 3.491116000  | 1.748980000  |
| 1          | -1.164958000 | 3.760823000  | 1.976045000  |
| 6          | -4.311029000 | 2.830786000  | 1.054312000  |
| 1          | -4.769550000 | 1.406668000  | -0.508796000 |
| 1          | -3.541615000 | 4.193708000  | 2.540147000  |
| 1          | -5.351625000 | 3.018485000  | 1.304511000  |
| 6          | 1.164937000  | -1.110594000 | -1.364625000 |
| 1          | 1.712909000  | -1.142479000 | -2.314597000 |
| 1          | 0.749288000  | -2.096659000 | -1.168658000 |
| 1          | 0.347460000  | -0.388004000 | -1.458438000 |
| <b>TS8</b> |              |              |              |
| 6          | -4.399066000 | -1.059413000 | -0.061606000 |
| 6          | -3.149604000 | -0.342471000 | 0.456182000  |
| 6          | -2.009019000 | -1.373340000 | 0.201596000  |
| 6          | -2.610543000 | -2.337187000 | -0.825604000 |
| 1          | -3.282265000 | -0.155573000 | 1.526837000  |
| 1          | -1.897690000 | -1.981886000 | 1.109672000  |
| 7          | -3.987061000 | -2.144363000 | -0.837356000 |
| 8          | -2.030361000 | -3.168960000 | -1.495676000 |
| 8          | -5.560092000 | -0.739917000 | 0.104900000  |
| 6          | -4.898760000 | -2.985809000 | -1.596354000 |
| 1          | -4.775134000 | -4.031894000 | -1.303215000 |
| 1          | -5.913302000 | -2.649661000 | -1.378953000 |
| 6          | -4.627948000 | 4.494511000  | -0.058765000 |
| 6          | -3.734606000 | 3.421827000  | -0.504906000 |
| 1          | -2.696862000 | 3.714809000  | -0.296466000 |
| 1          | -3.822430000 | 3.331228000  | -1.595446000 |
| 7          | -5.336987000 | 5.337847000  | 0.307374000  |
| 6          | -4.037957000 | 2.066478000  | 0.170975000  |
| 1          | -3.995004000 | 2.195436000  | 1.259723000  |
| 1          | -5.054260000 | 1.740023000  | -0.067044000 |
| 6          | -3.000971000 | 1.020745000  | -0.260092000 |

|   |              |              |              |
|---|--------------|--------------|--------------|
| 1 | -2.009759000 | 1.430929000  | -0.047507000 |
| 1 | -3.050625000 | 0.871967000  | -1.349141000 |
| 1 | -4.693535000 | -2.896765000 | -2.667147000 |
| 6 | 3.461300000  | -3.226362000 | -0.549782000 |
| 6 | 2.603661000  | -2.310165000 | 0.079565000  |
| 6 | 2.566659000  | -0.965540000 | -0.365581000 |
| 6 | 3.345083000  | -0.612666000 | -1.483245000 |
| 6 | 4.184484000  | -1.525507000 | -2.109344000 |
| 6 | 4.247957000  | -2.835018000 | -1.629657000 |
| 1 | 3.502404000  | -4.254281000 | -0.212551000 |
| 1 | 3.271932000  | 0.397746000  | -1.867910000 |
| 1 | 4.771859000  | -1.222431000 | -2.970605000 |
| 1 | 4.895232000  | -3.565076000 | -2.107229000 |
| 7 | 1.797275000  | -2.719003000 | 1.158416000  |
| 6 | 0.717095000  | -1.979101000 | 1.606288000  |
| 8 | -0.020041000 | -2.412775000 | 2.485881000  |
| 6 | 0.413751000  | -0.616975000 | 0.941630000  |
| 6 | -0.609436000 | -0.896561000 | -0.223346000 |
| 1 | -0.186603000 | -1.666802000 | -0.878009000 |
| 1 | -0.677886000 | 0.014779000  | -0.823408000 |
| 6 | -0.179809000 | 0.282299000  | 2.045583000  |
| 1 | -0.987454000 | -0.240275000 | 2.558546000  |
| 1 | 0.587380000  | 0.512542000  | 2.793409000  |
| 1 | -0.551220000 | 1.220706000  | 1.635082000  |
| 6 | 1.667758000  | -0.006078000 | 0.301740000  |
| 6 | 1.832882000  | 1.341402000  | 0.225423000  |
| 6 | 3.015395000  | 2.165112000  | 0.044446000  |
| 6 | 2.894970000  | 3.427495000  | -0.581600000 |
| 6 | 4.281242000  | 1.779977000  | 0.547023000  |
| 6 | 4.009855000  | 4.241991000  | -0.753242000 |
| 1 | 1.910798000  | 3.752197000  | -0.905934000 |
| 6 | 5.389061000  | 2.600766000  | 0.375372000  |
| 1 | 4.379248000  | 0.831589000  | 1.065267000  |
| 6 | 5.260533000  | 3.831102000  | -0.281092000 |
| 1 | 3.903709000  | 5.204759000  | -1.245414000 |
| 1 | 6.355587000  | 2.289489000  | 0.762074000  |
| 1 | 6.128281000  | 4.472646000  | -0.407546000 |
| 6 | 2.012021000  | -4.032721000 | 1.768337000  |
| 1 | 3.066074000  | -4.150261000 | 2.035716000  |
| 1 | 1.392222000  | -4.085455000 | 2.660490000  |
| 1 | 1.719756000  | -4.837993000 | 1.084676000  |
| 1 | 0.854132000  | 2.017607000  | 0.266963000  |
| 8 | -0.185172000 | 3.012273000  | 0.277279000  |
| 1 | 0.032242000  | 3.480833000  | 1.107304000  |

**H<sub>2</sub>O**

|           |              |              |              |
|-----------|--------------|--------------|--------------|
| 1         | 0.762745000  | -0.477164000 | 0.000000000  |
| 8         | 0.000000000  | 0.119327000  | 0.000000000  |
| 1         | -0.762745000 | -0.477450000 | 0.000000000  |
| <b>8a</b> |              |              |              |
| 6         | -4.359822000 | -0.967634000 | 0.031873000  |
| 6         | -3.175905000 | -0.119707000 | 0.513127000  |
| 6         | -1.948791000 | -1.056270000 | 0.294343000  |
| 6         | -2.467768000 | -2.113156000 | -0.685348000 |
| 1         | -3.325286000 | 0.094997000  | 1.576563000  |
| 1         | -1.801676000 | -1.613945000 | 1.230006000  |
| 7         | -3.857103000 | -2.042397000 | -0.697352000 |
| 8         | -1.820815000 | -2.921908000 | -1.320015000 |
| 8         | -5.544040000 | -0.744557000 | 0.195881000  |
| 6         | -4.693091000 | -2.999595000 | -1.405661000 |
| 1         | -4.474195000 | -4.013876000 | -1.061291000 |
| 1         | -5.733013000 | -2.745731000 | -1.197195000 |
| 6         | -5.350292000 | 4.390239000  | -0.369097000 |
| 6         | -4.271642000 | 3.458780000  | -0.712983000 |
| 1         | -3.313095000 | 3.968019000  | -0.547117000 |
| 1         | -4.331064000 | 3.243708000  | -1.787755000 |
| 7         | -6.206181000 | 5.120903000  | -0.084933000 |
| 6         | -4.334410000 | 2.147355000  | 0.098765000  |
| 1         | -4.308683000 | 2.385658000  | 1.169218000  |
| 1         | -5.285944000 | 1.642366000  | -0.085984000 |
| 6         | -3.157582000 | 1.225166000  | -0.251314000 |
| 1         | -2.222163000 | 1.745876000  | -0.015799000 |
| 1         | -3.139819000 | 1.033315000  | -1.334173000 |
| 1         | -4.499878000 | -2.946595000 | -2.480945000 |
| 6         | 2.938757000  | -3.125332000 | -0.749314000 |
| 6         | 2.333302000  | -2.110478000 | 0.004741000  |
| 6         | 2.423147000  | -0.766475000 | -0.421667000 |
| 6         | 3.066844000  | -0.488902000 | -1.635371000 |
| 6         | 3.660057000  | -1.498500000 | -2.389515000 |
| 6         | 3.602625000  | -2.816639000 | -1.935745000 |
| 1         | 2.876944000  | -4.158058000 | -0.427855000 |
| 1         | 3.099577000  | 0.537792000  | -1.983553000 |
| 1         | 4.155823000  | -1.258353000 | -3.325325000 |
| 1         | 4.059275000  | -3.616186000 | -2.512297000 |
| 7         | 1.637737000  | -2.409940000 | 1.199034000  |
| 6         | 0.698969000  | -1.553588000 | 1.744728000  |
| 8         | 0.050844000  | -1.865922000 | 2.739659000  |
| 6         | 0.444041000  | -0.210671000 | 1.015381000  |
| 6         | -0.579276000 | -0.498764000 | -0.142154000 |

|            |              |              |              |
|------------|--------------|--------------|--------------|
| 1          | -0.139861000 | -1.230409000 | -0.826686000 |
| 1          | -0.693234000 | 0.426957000  | -0.715746000 |
| 6          | -0.156603000 | 0.768740000  | 2.034048000  |
| 1          | -1.023760000 | 0.322944000  | 2.522600000  |
| 1          | 0.564376000  | 1.015081000  | 2.819169000  |
| 1          | -0.465310000 | 1.698858000  | 1.545723000  |
| 6          | 1.764050000  | 0.269797000  | 0.402689000  |
| 6          | 2.240810000  | 1.517173000  | 0.615971000  |
| 6          | 3.537150000  | 2.120436000  | 0.241962000  |
| 6          | 3.572380000  | 3.480563000  | -0.115543000 |
| 6          | 4.757462000  | 1.423479000  | 0.313643000  |
| 6          | 4.774728000  | 4.113679000  | -0.428697000 |
| 1          | 2.642029000  | 4.043035000  | -0.152289000 |
| 6          | 5.959982000  | 2.058146000  | 0.010309000  |
| 1          | 4.760077000  | 0.383310000  | 0.621777000  |
| 6          | 5.974932000  | 3.403251000  | -0.369480000 |
| 1          | 4.774137000  | 5.163117000  | -0.711271000 |
| 1          | 6.891362000  | 1.502171000  | 0.079048000  |
| 1          | 6.914784000  | 3.895093000  | -0.604933000 |
| 6          | 1.807763000  | -3.719589000 | 1.827914000  |
| 1          | 2.873041000  | -3.949993000 | 1.919053000  |
| 1          | 1.348976000  | -3.675203000 | 2.813625000  |
| 1          | 1.317216000  | -4.507192000 | 1.243689000  |
| 1          | 1.599373000  | 2.203349000  | 1.162652000  |
| <b>·OH</b> |              |              |              |
| 8          | 0.000000000  | 0.000000000  | 0.109254000  |
| 1          | 0.000000000  | 0.000000000  | -0.874036000 |

## (E) References

- [1] Yu, J.-X.; Teng, F.; Xiang, J.-N.; Deng, W.; Li, J.-H. One-Carbon Incorporation Using Cyclobutanone Oxime Ester Enabled [2+2+1] Carboannulation of 1,7-Enynes by C–C/N–O Bond Cleavage and C–H Functionalization. *Org. Lett.* **2019**, *21*, 9434–9437.
- [2] a) Yu, X.-Y.; Chen, J.-R.; Wang, P.-Z.; Yang, M.-N.; Liang, D.; Xiao, W.-J. A Visible-Light-Driven Iminyl Radical-Mediated C–C Single Bond Cleavage/Radical Addition Cascade of Oxime Esters. *Angew. Chem. Int. Ed.* **2018**, *57*, 738–743; b) Zhao, B.-L.; Shi, Z.-Z. Copper-Catalyzed Intermolecular Heck-Like Coupling of Cyclobutanone Oximes Initiated by Selective C–C Bond Cleavage. *Angew. Chem. Int. Ed.* **2017**, *56*, 12727–12731; c) Gu, Y.-R.; Duan, X.-H.; Yang, L.; Guo, L.-N. Direct C–H Cyanoalkylation of Heteroaromatic *N*-Oxides and Quinones *via* C–C Bond Cleavage of Cyclobutanone Oximes. *Org. Lett.* **2017**, *19*, 5908–5911; d) Li, L.-Y.; Chen, H.-G.; Mei, M.-J.; Zhou, L. Visible-light Promoted  $\gamma$ -Cyanoalkyl Radical Generation: Three-component Cyanopropylation/Etherification of Unactivated Alkenes. *Chem. Commun.* **2017**, *53*, 11544–11547.
- [3] Tian, L.; Gao, S. Q.; Wang, R.; Li, Y.; Tang, C. L.; Shi, L. L.; Fu, J. K. Copper-catalyzed Ring-opening C(sp<sup>3</sup>)–N Coupling of Cycloketone Oxime Esters: Access to 1°, 2° and 3° Alkyl Amines. *Chem. Commun.* **2019**, *55*, 5347–5350.
- [4] Frisch, M. J.; Trucks, G. W.; Schlegel, H. B.; Scuseria, G. E.; Robb, M. A.; Cheeseman, J. R.; Scalmani, G.; Barone, V.; Petersson, G. A.; Nakatsuji, H.; Li, X.; Caricato, M.; Marenich, A. V.; Bloino, J.; Janesko, B. G.; Gomperts, R.; Mennucci,

B.; Hratchian, H. P.; Ortiz, J. V.; Izmaylov, A. F.; Sonnenberg, J. L.; Williams-Young, D.; Ding, F.; Lipparini, F.; Egidi, F.; Goings, J.; Peng, B.; Petrone, A.; Henderson, T.; Ranasinghe, D.; Zakrzewski, V. G.; Gao, J.; Rega, N.; Zheng, G.; Liang, W.; Hada, M.; Ehara, M.; Toyota, K.; Fukuda, R.; Hasegawa, J.; Ishida, M.; Nakajima, T.; Honda, Y.; Kitao, O.; Nakai, H.; Vreven, T.; Throssell, K.; Montgomery, J. A. Jr.; Peralta, J. E.; Ogliaro, F.; Bearpark, M. J.; Heyd, J. J.; Brothers, E. N.; Kudin, K. N.; Staroverov, V. N.; Keith, T. A.; Kobayashi, R.; Normand, J.; Raghavachari, K.; Rendell, A. P.; Burant, J. C.; Iyengar, S. S.; Tomasi, J.; Cossi, M.; Millam, J. M.; Klene, M.; Adamo, C.; Cammi, R.; Ochterski, J. W.; Martin, R. L.; Morokuma, K.; Farkas, O.; Foresman, J. B.; Fox, D. J. Gaussian Inc Wallingford CT, **2016**.

[5] a) Becke, A.-D. Density-functional Thermochemistry. III. The Role of Exact Exchange. *J. Chem. Phys.* **1993**, *98*, 5648–5652; b) Lee, C.; Yang W.; Parr, R-G. Development of the Colle-Salvetti Correlation-energy Formula into a Functional of the Electron Density. *Rev. B: Condens. Matter Mater. Phys.* **1988**, *37*, 785–787; c) Becke, A.-D. Density-functional Exchange-energy Approximation with Correct Asymptotic Behavior. *Phys. Rev. A: At., Mol., Opt. Phys.* **1988**, *38*, 3098–3100.

[6] Marenich, A. V.; Cramer, C. J.; Truhlar, D. G. Universal Solvation Model Based on Solute Electron Density and on a Continuum Model of the Solvent Defined by the Bulk Dielectric Constant and Atomic Surface Tensions. *J. Phys. Chem. B.* **2009**, *113*, 6378–6396.



(F) Spectra

4-(1'-Benzyl-3a,5-dimethyl-2',4,5'-trioxo-1-phenyl-3,3a,4,5-tetrahydrospiro[cyclopenta[c]quinoline-2,3'-pyrrolidin]-4'-yl)butanenitrile (4a)

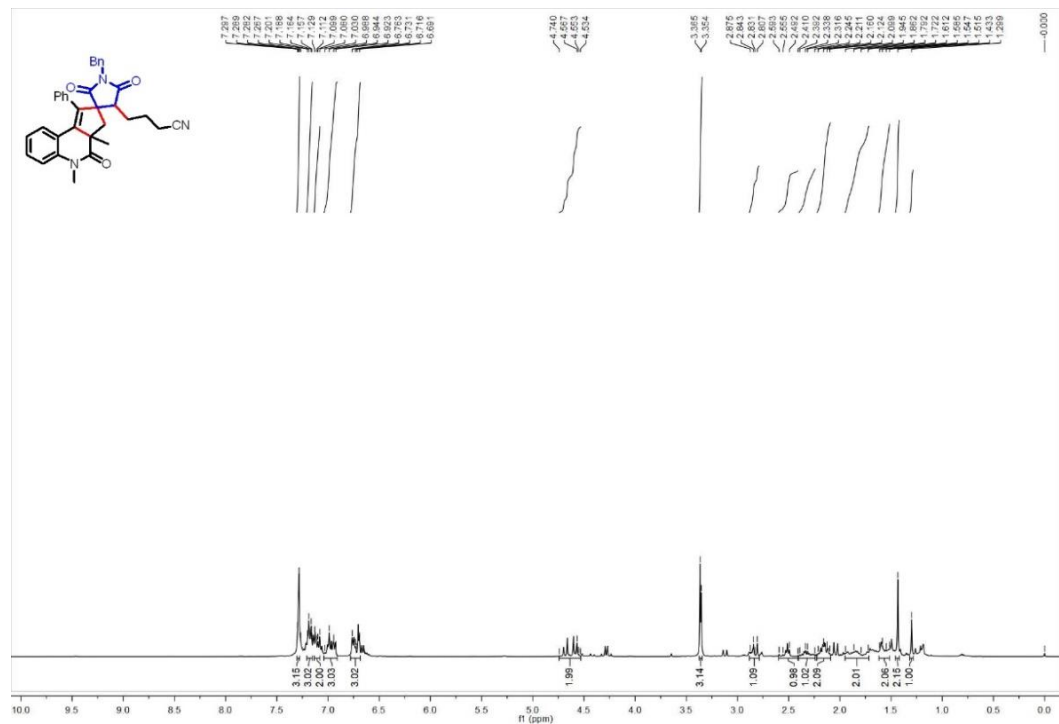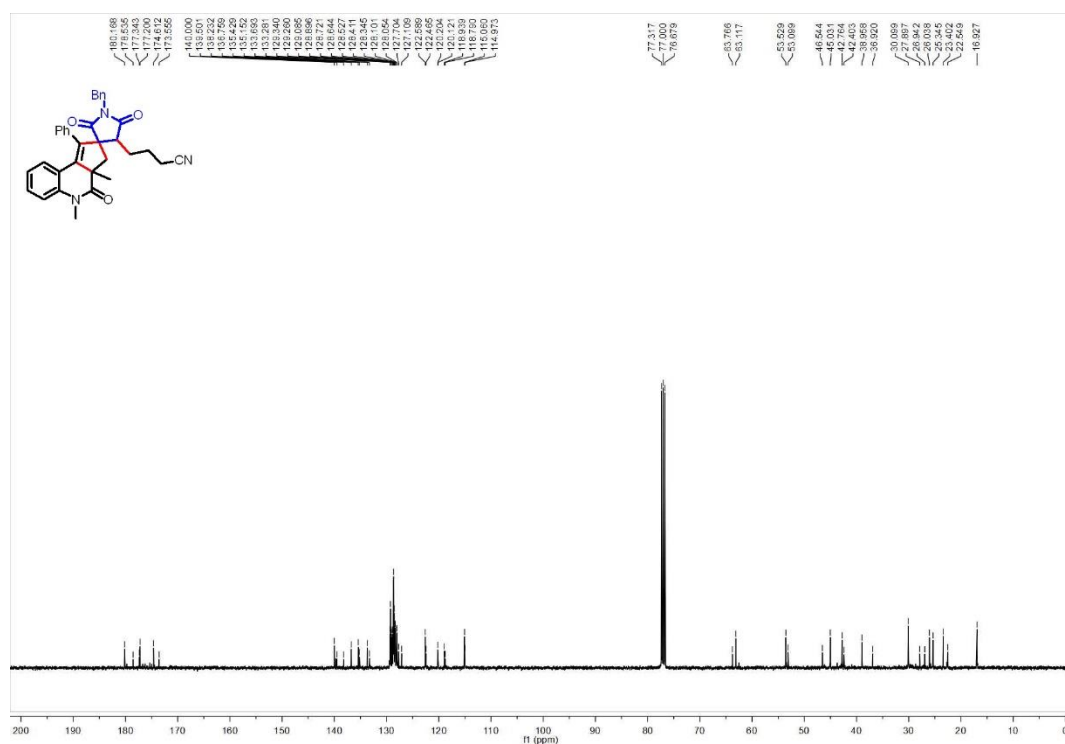

**4-(1'-Benzyl-3a,5-dimethyl-2',4,5'-trioxo-1-phenyl-3,3a,4,5-tetrahydrospiro[cyclopenta[c]quinoline-2,3'-pyrrolidin]-4'-yl)-3-phenylbutanenitrile (4b)**

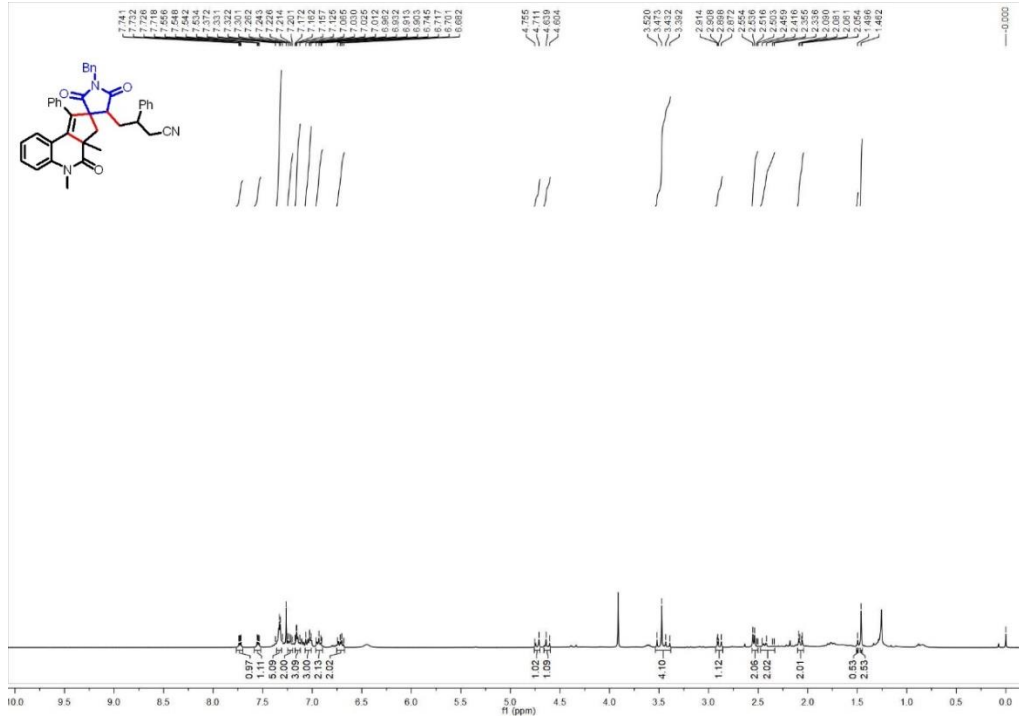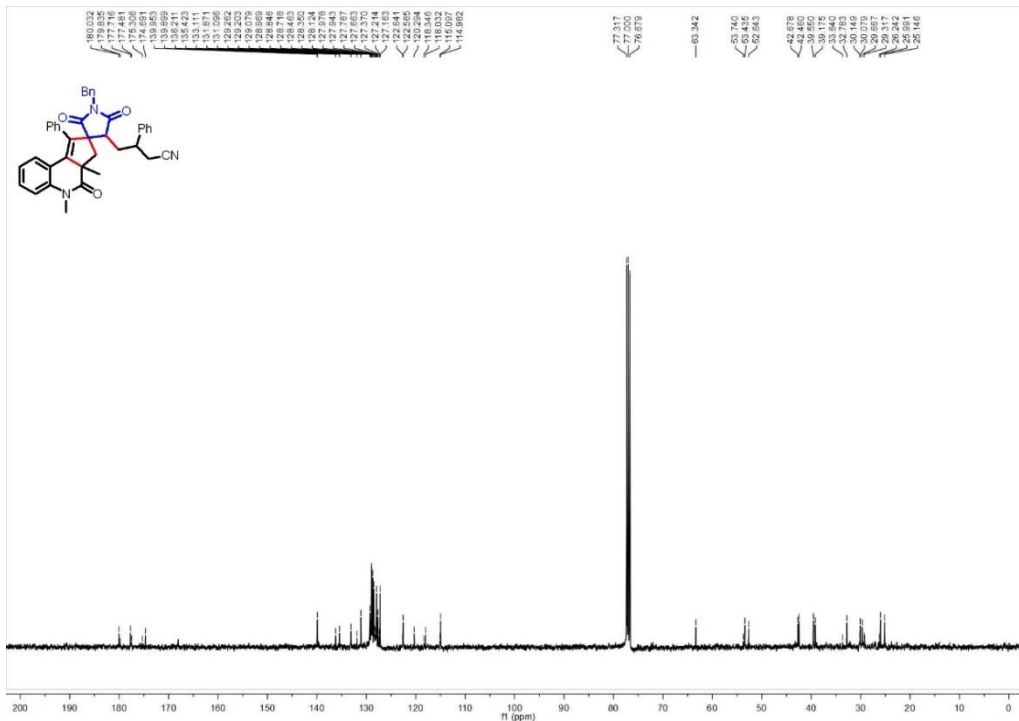

**4-(1'-Benzyl-3a,5-dimethyl-2',4,5'-trioxo-1-phenyl-3,3a,4,5-tetrahydrospiro[cyclopenta[c]quinoline-2,3'-pyrrolidin]-4'-yl)-3-(benzyloxy)butanenitrile (4c)**

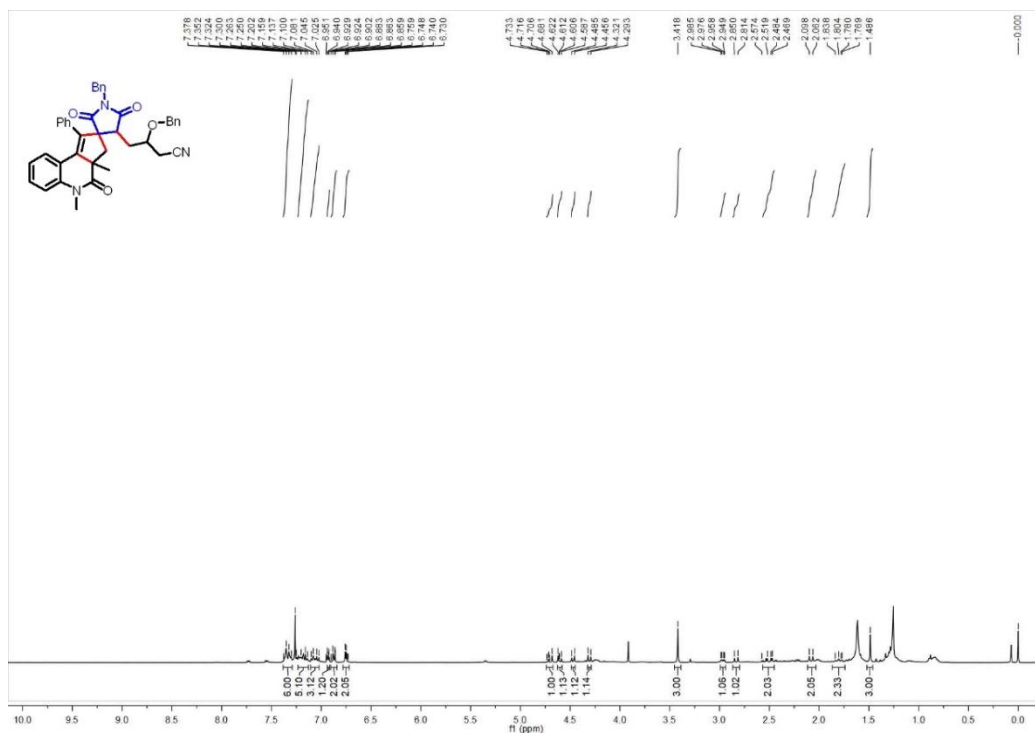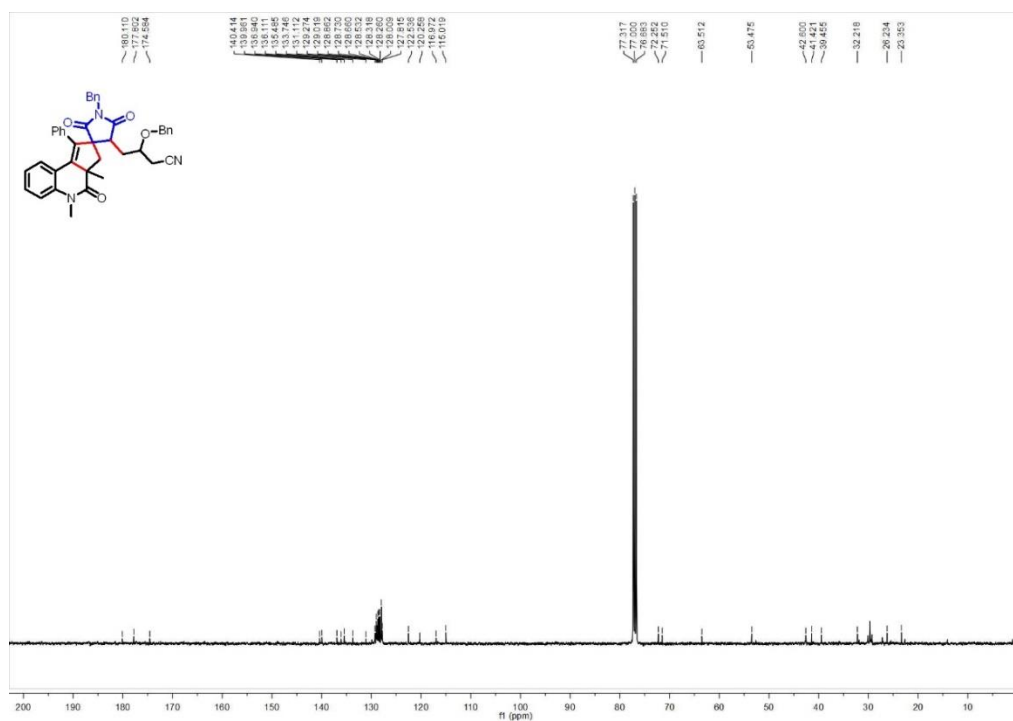

2-((1'-Benzyl-3a,5-dimethyl-2',4,5'-trioxo-1-phenyl-3,3a,4,5-tetrahydrospiro[cyclopenta[c]quinoline-2,3'-pyrrolidin]-4'-yl)methoxy)acetonitrile (4d)

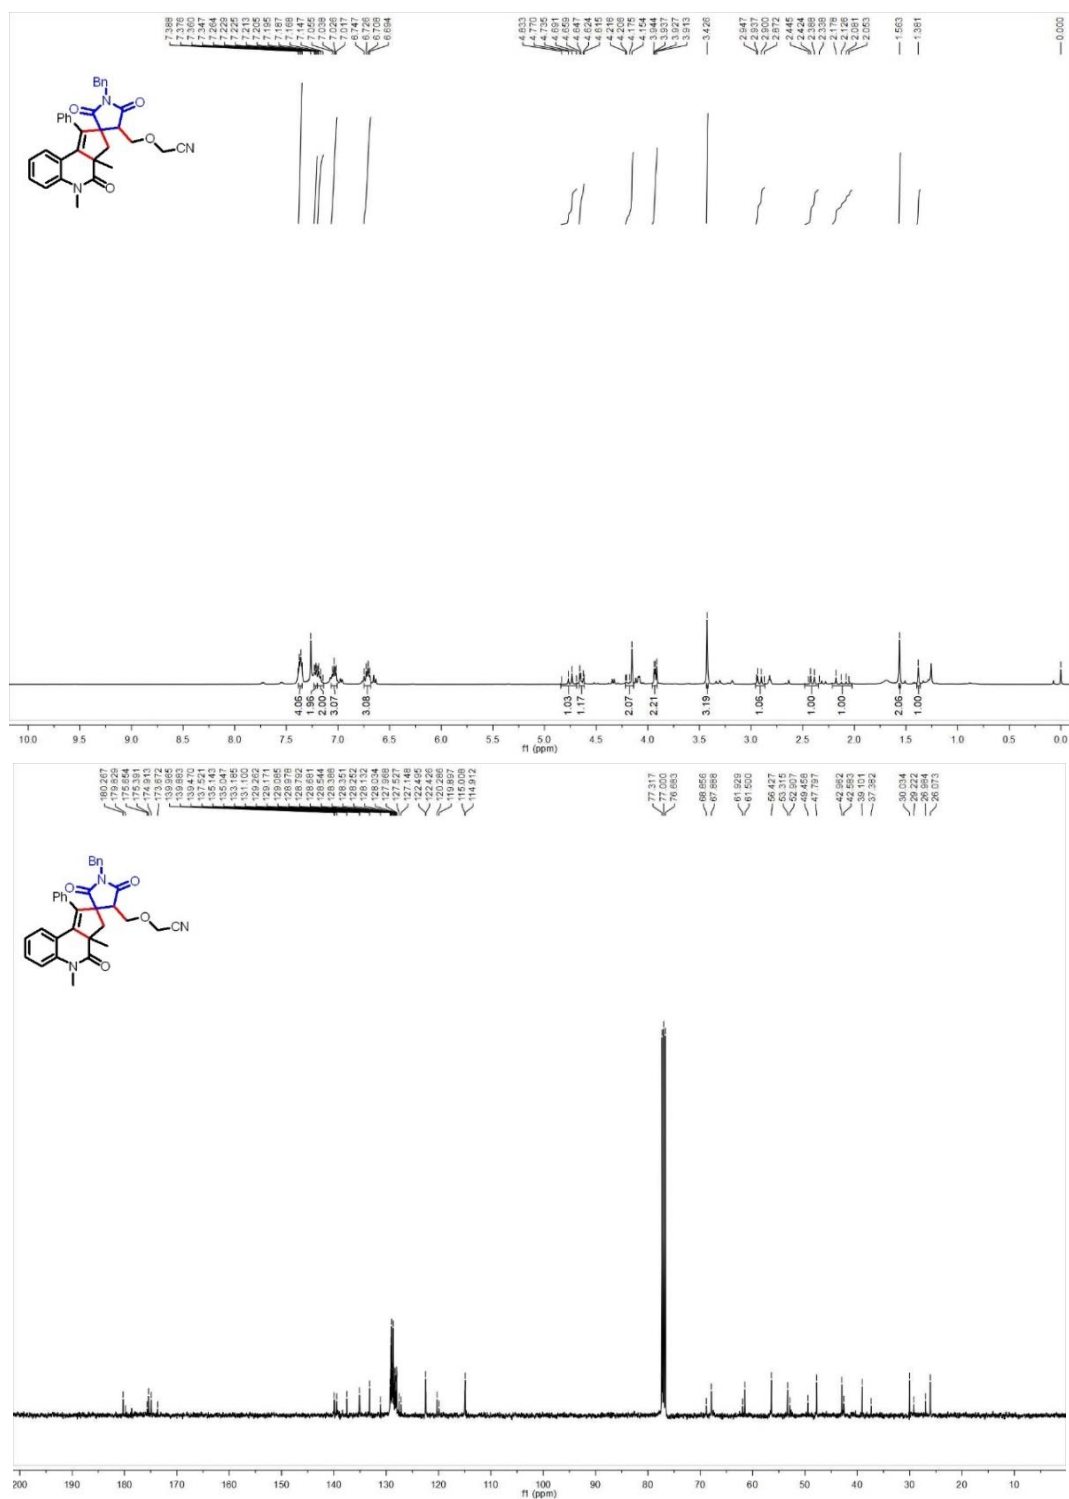

**4-(1'-Cyclohexyl-3a,5-dimethyl-2',4,5'-trioxo-1-phenyl-3,3a,4,5-tetrahydrospiro[cyclopenta[c]quinoline-2,3'-pyrrolidin]-4'-yl)butanenitrile (4e)**

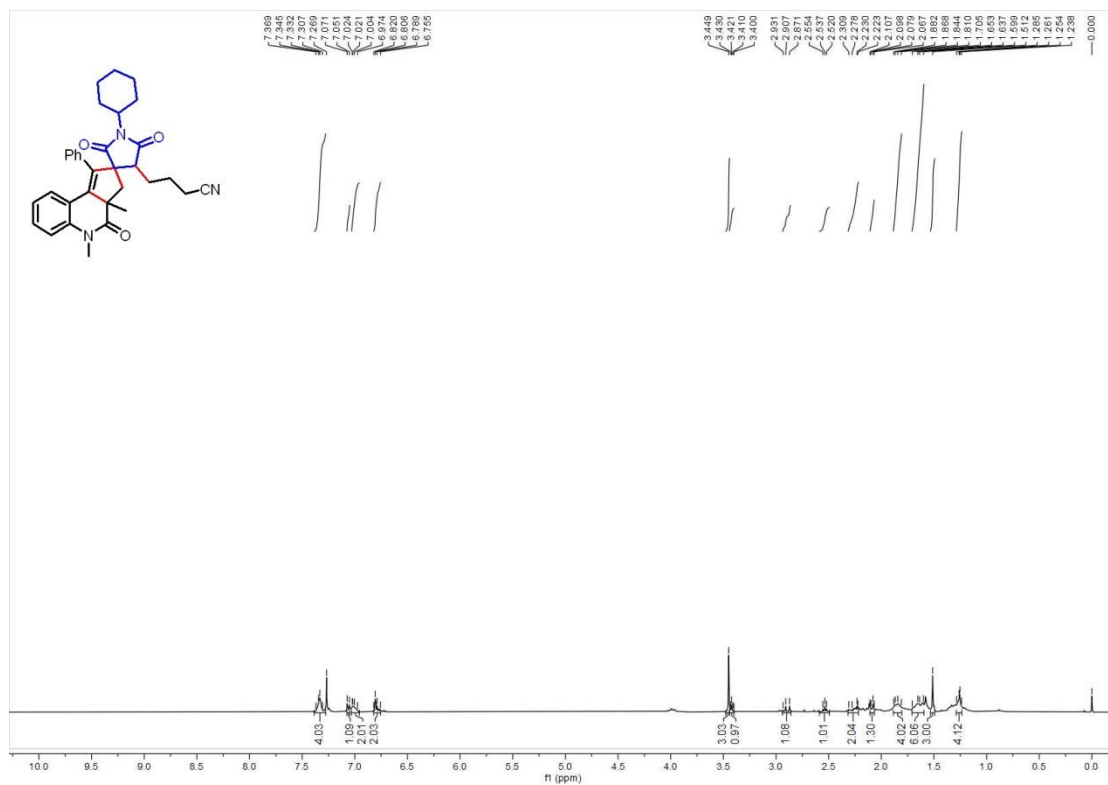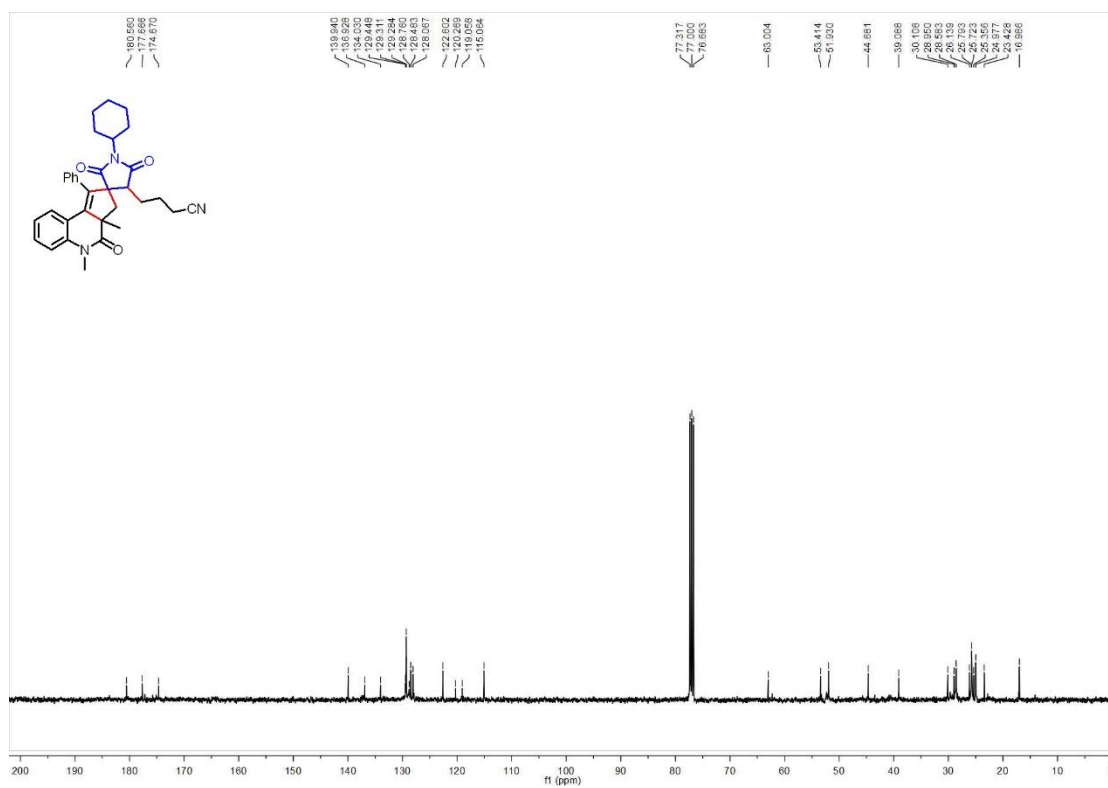

**4-(1'-(*tert*-Butyl)-3a,5-dimethyl-2',4,5'-trioxo-1-phenyl-3,3a,4,5-tetrahydrospiro[cyclopenta[*c*]quinoline-2,3'-pyrrolidin]-4'-yl)butanenitrile (4f)**

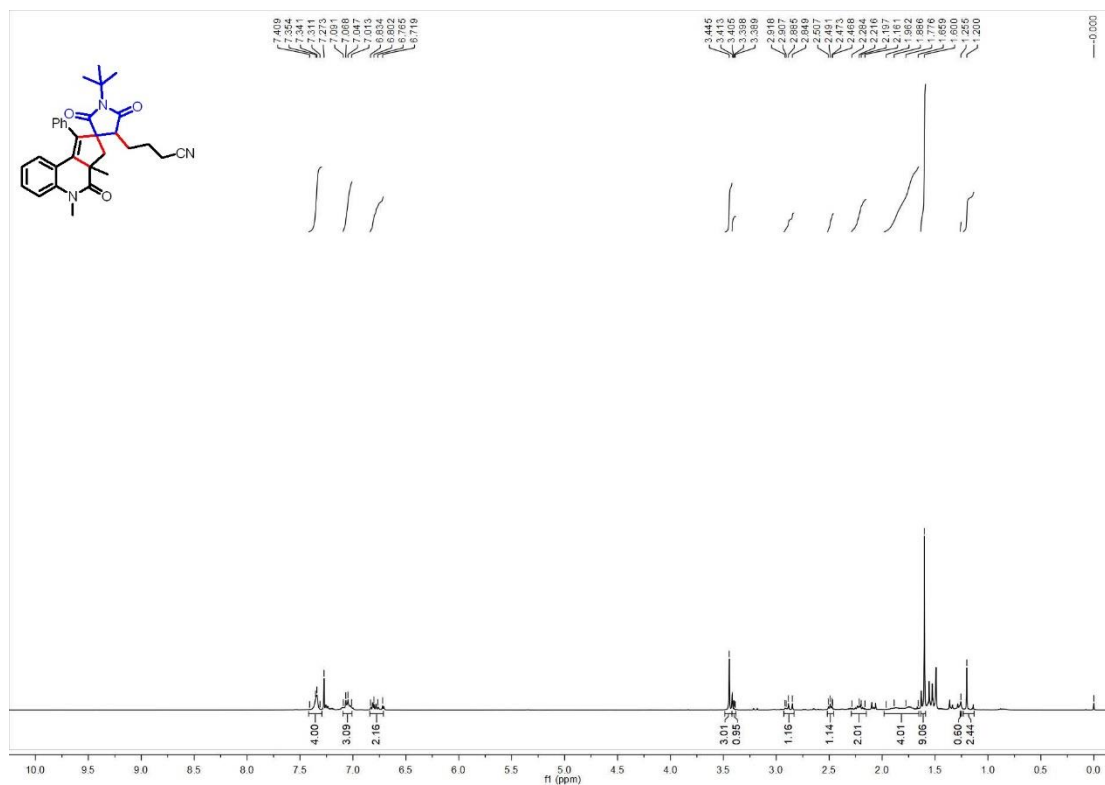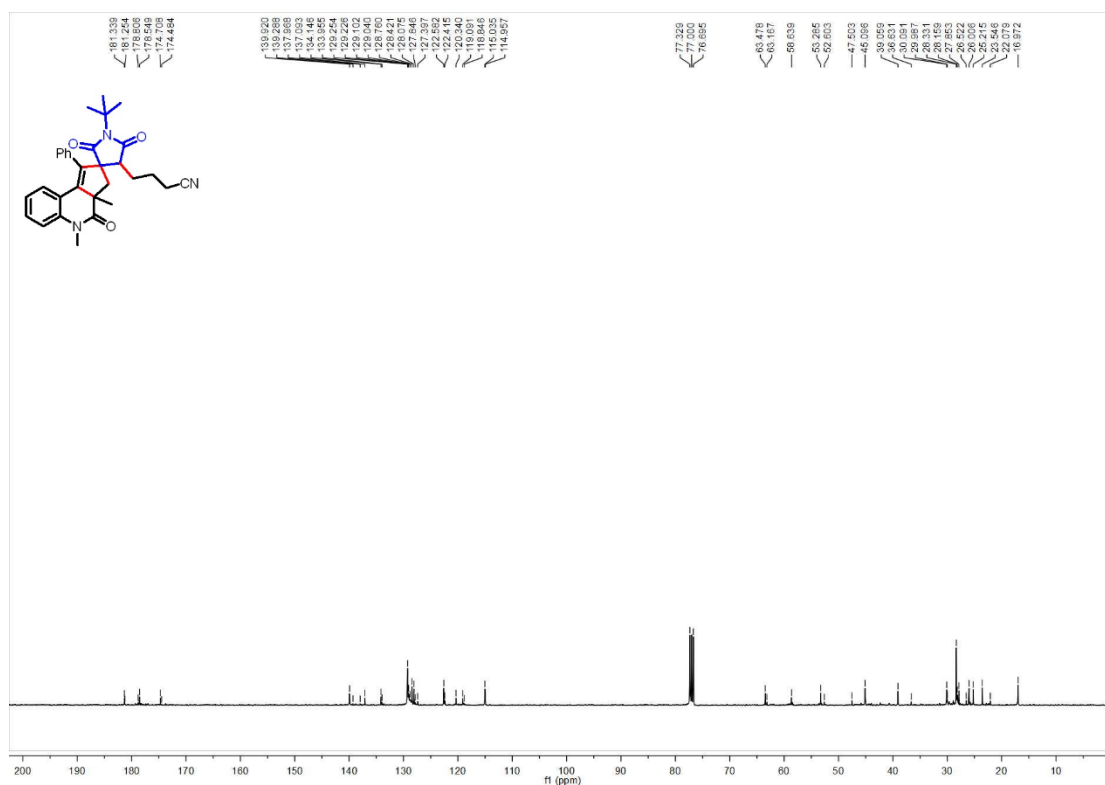

**4-(1'-Ethyl-3a,5-dimethyl-2',4,5'-trioxo-1-phenyl-3,3a,4,5-tetrahydrospiro[cyclopenta[c]quinoline-2,3'-pyrrolidin]-4'-yl)butanenitrile (4g)**

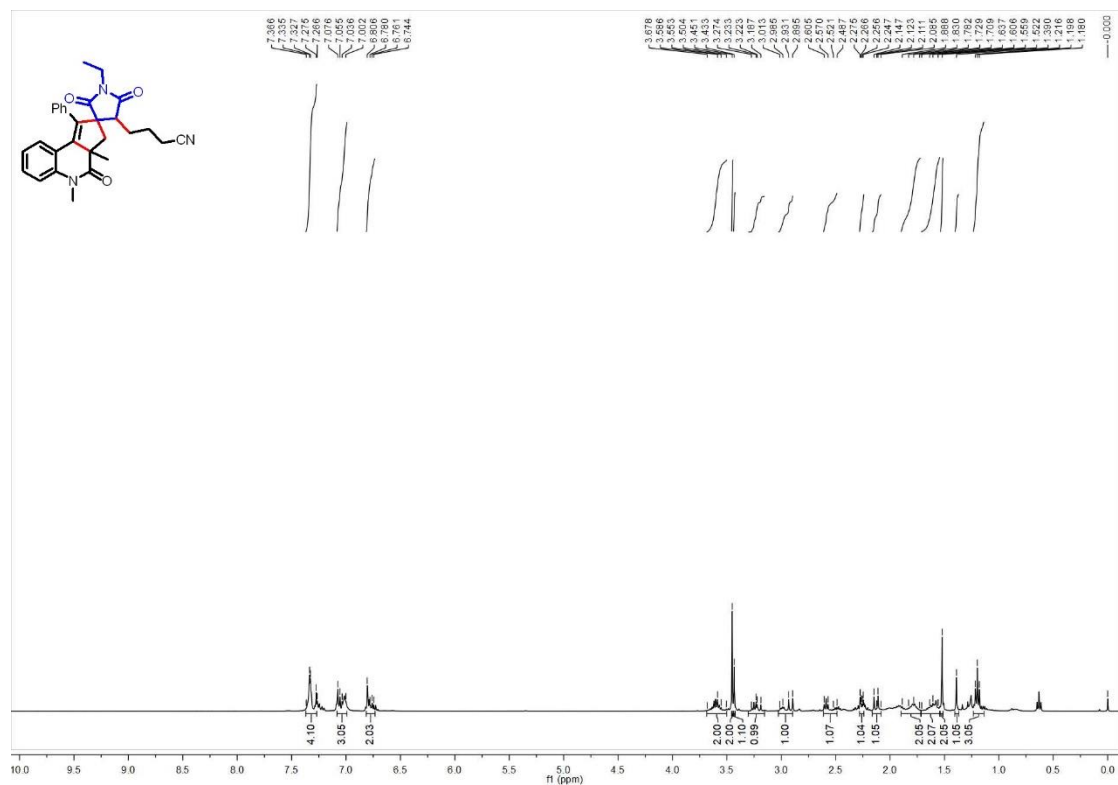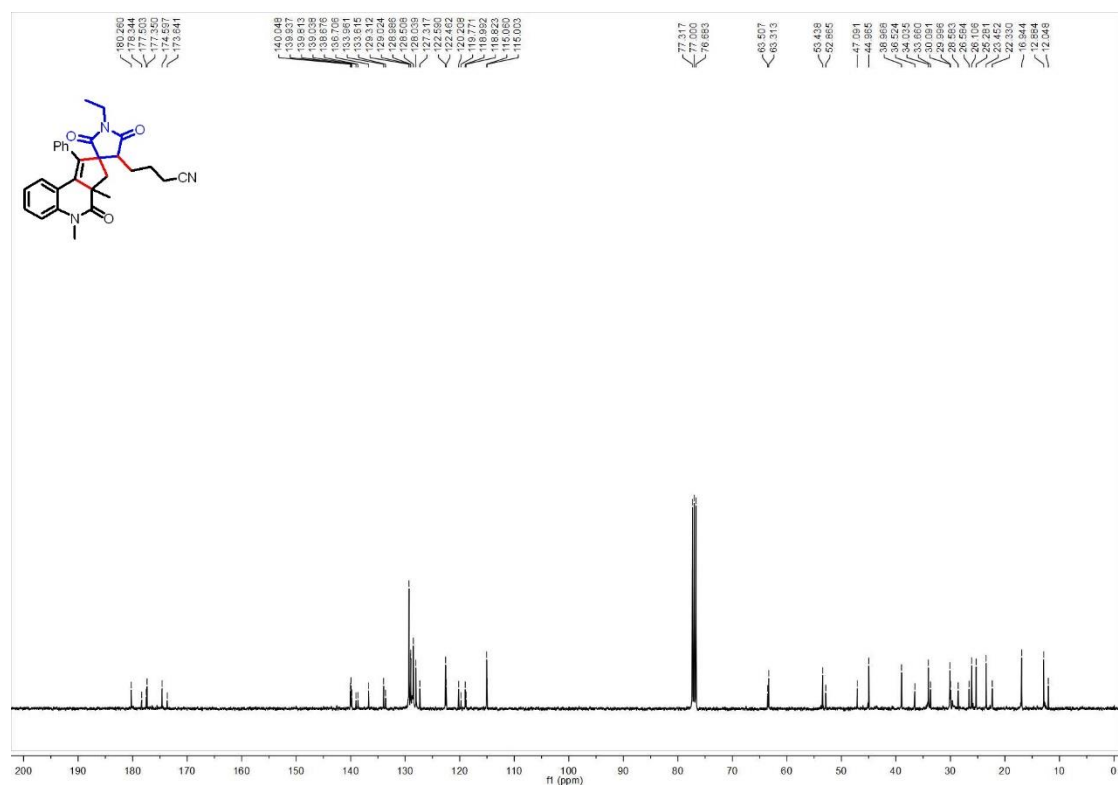

**4-(1',3a,5-Trimethyl-2',4,5'-trioxo-1-phenyl-3,3a,4,5-tetrahydrospiro[cyclopenta[*c*]quinoline-2,3'-pyrrolidin]-4'-yl)butanenitrile (4h)**

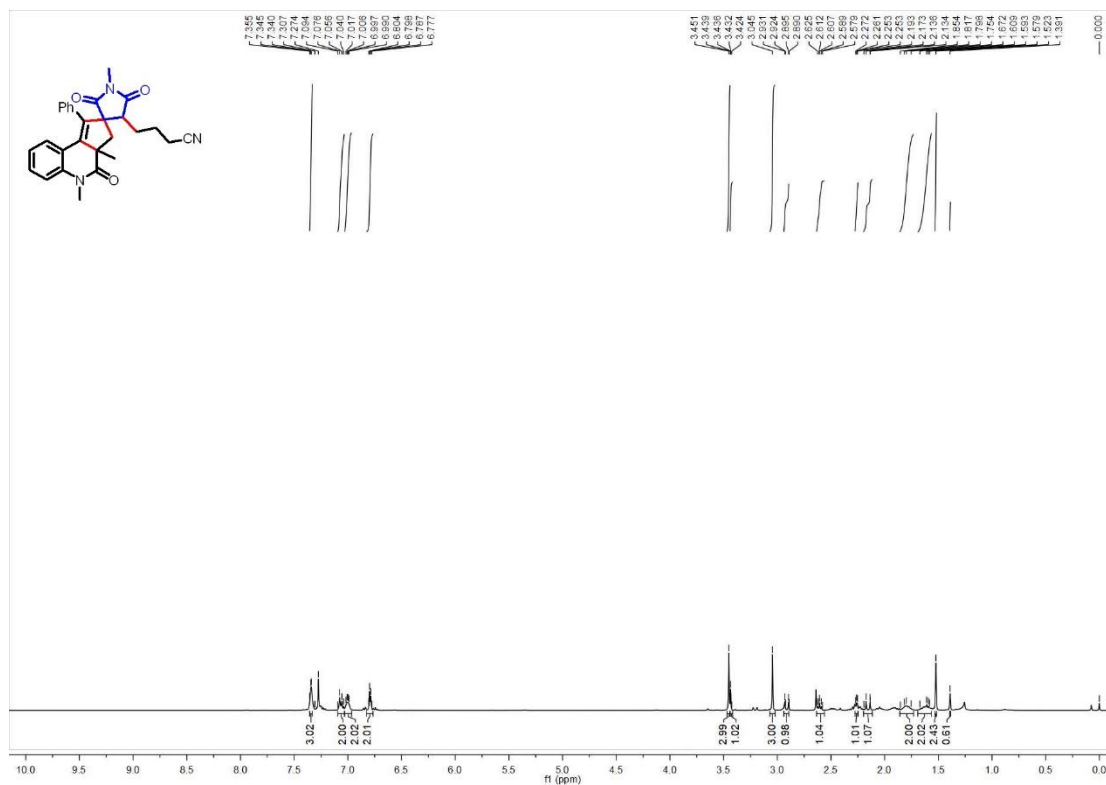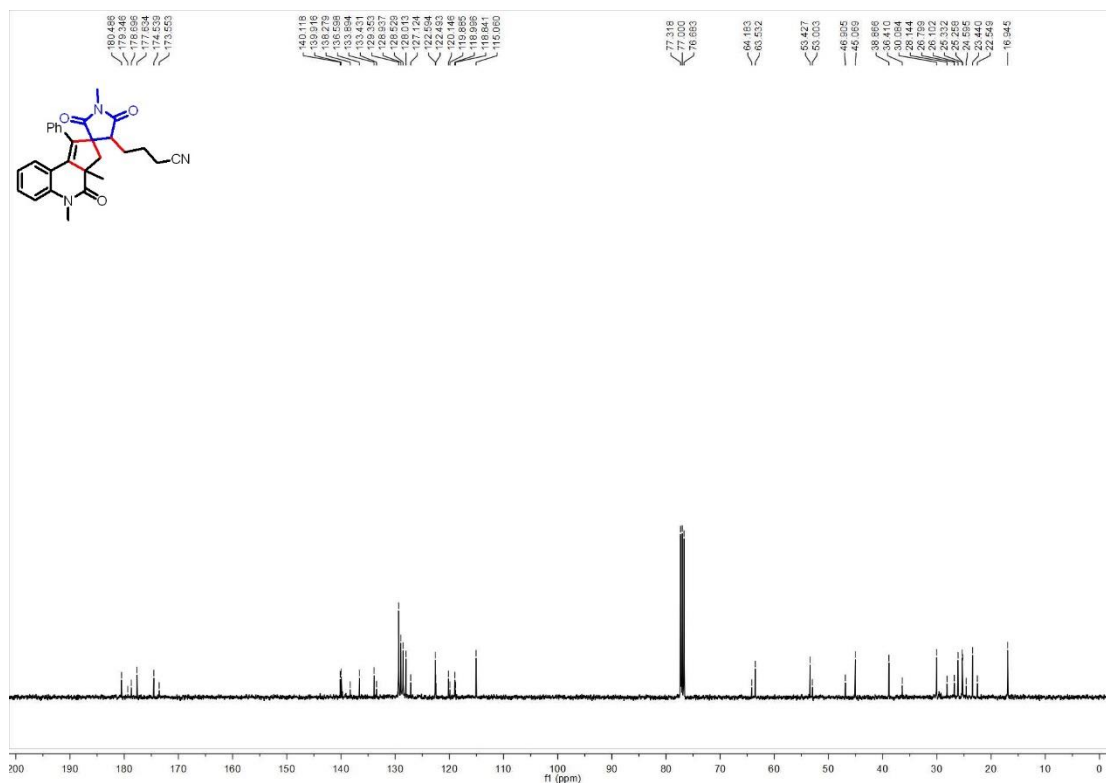



**4-(3a,5-Dimethyl-2',4,5'-trioxo-1-phenyl-3,3a,4,5-tetrahydrospiro[cyclopenta[c]quinoline-2,3'-pyrrolidin]-4'-yl)butanenitrile (4i)**

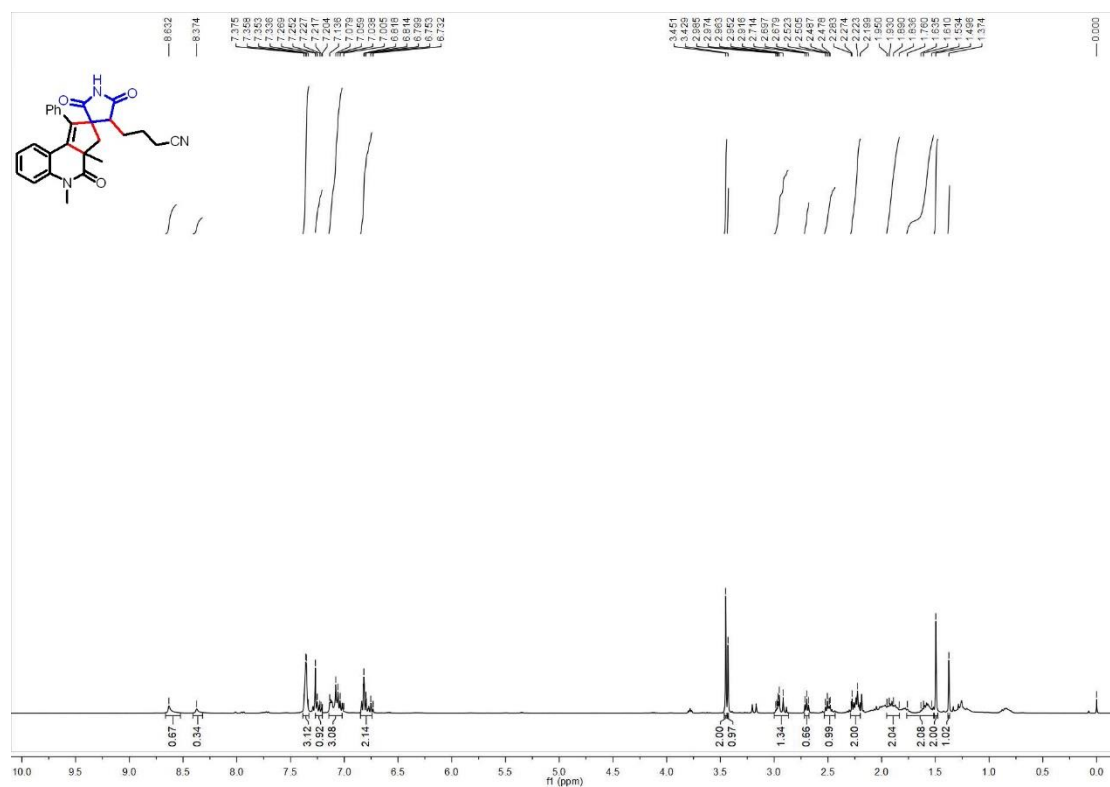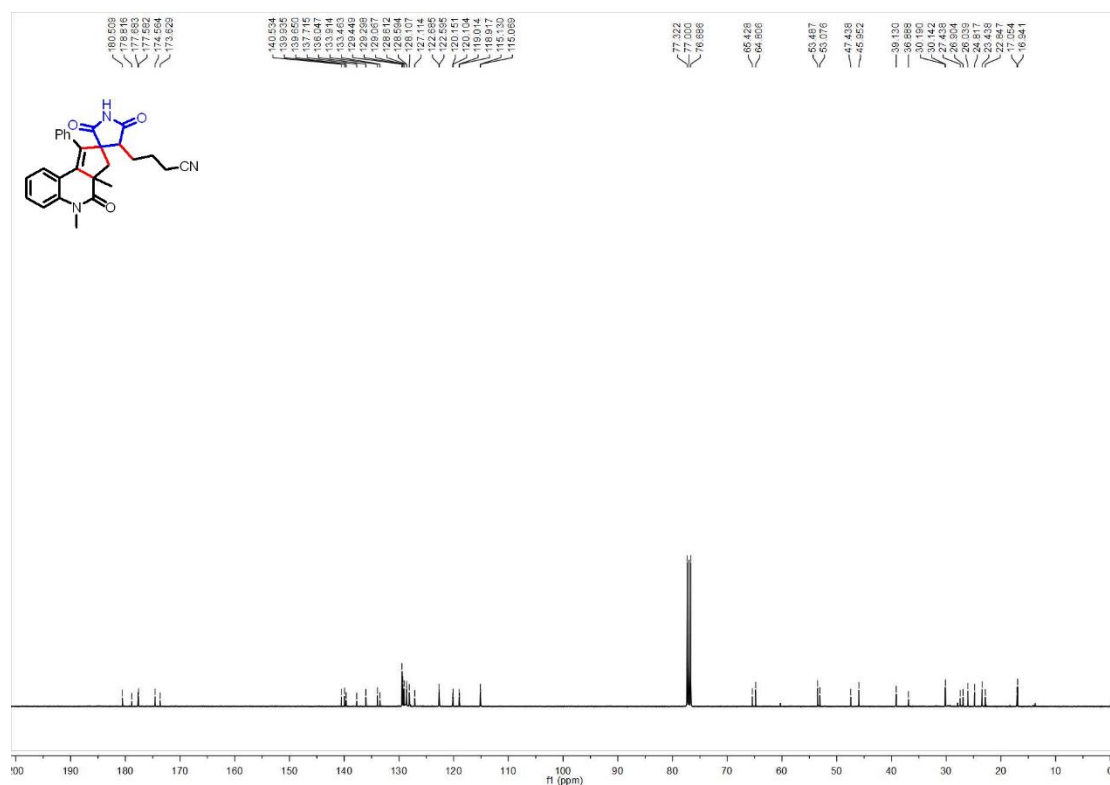

**4-(3a,5-Dimethyl-2',4,5'-trioxo-1,1'-diphenyl-3,3a,4,5-tetrahydrospiro[cyclopenta[c]quinoline-2,3'-pyrrolidin]-4'-yl)butanenitrile (4j)**

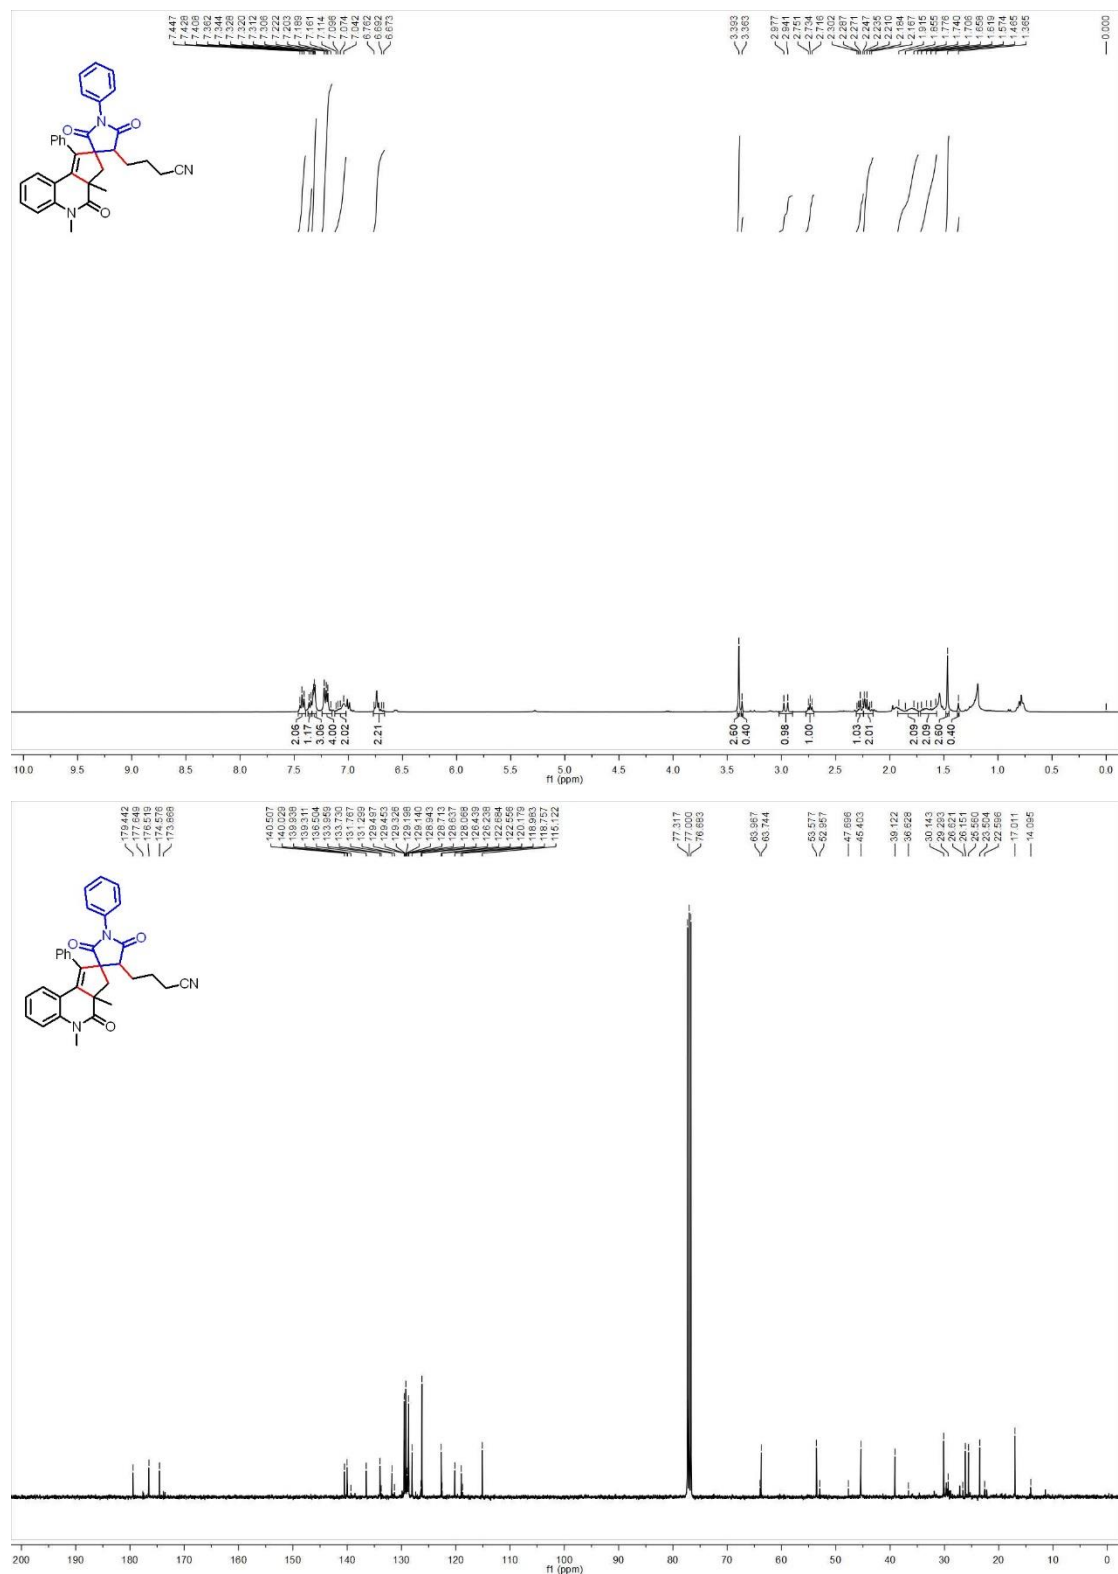

**4-(1'-(4-Bromophenyl)-3a,5-dimethyl-2',4,5'-trioxo-1-phenyl-3,3a,4,5-tetrahydrospiro[cyclopenta[c]quinoline-2,3'-pyrrolidin]-4'-yl)butanenitrile (4k)**

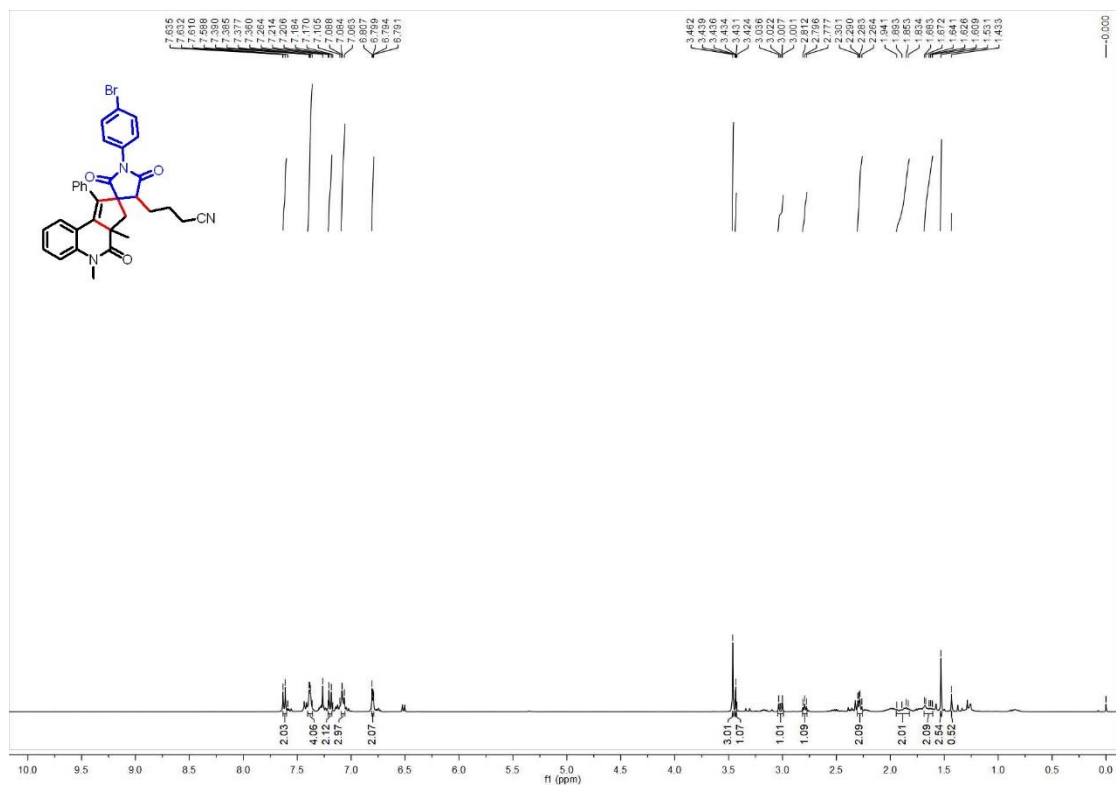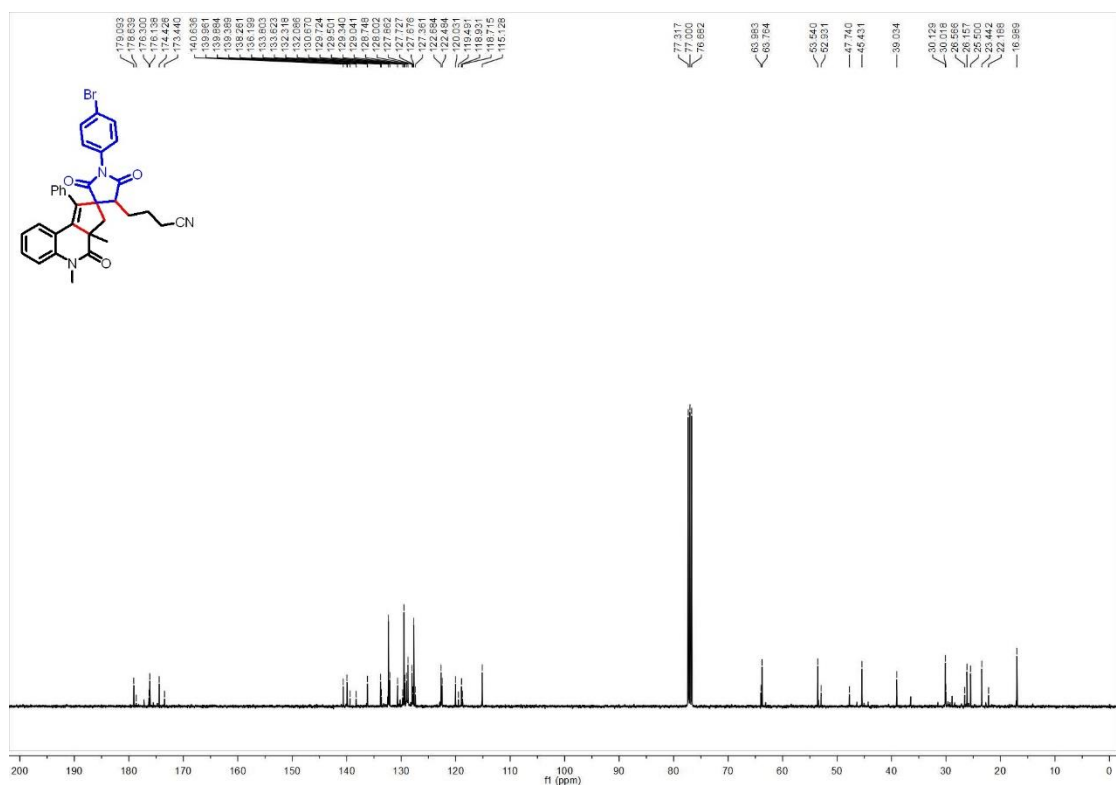

**4,4'-(1,3-Phenylenebis(3a,5-dimethyl-2',4,5'-trioxo-1-phenyl-3,3a,4,5-tetrahydrospiro[cyclopenta[c]quinoline-2,3'-pyrrolidine]-1',4'-diyl)dibutanenitrile (4I)**

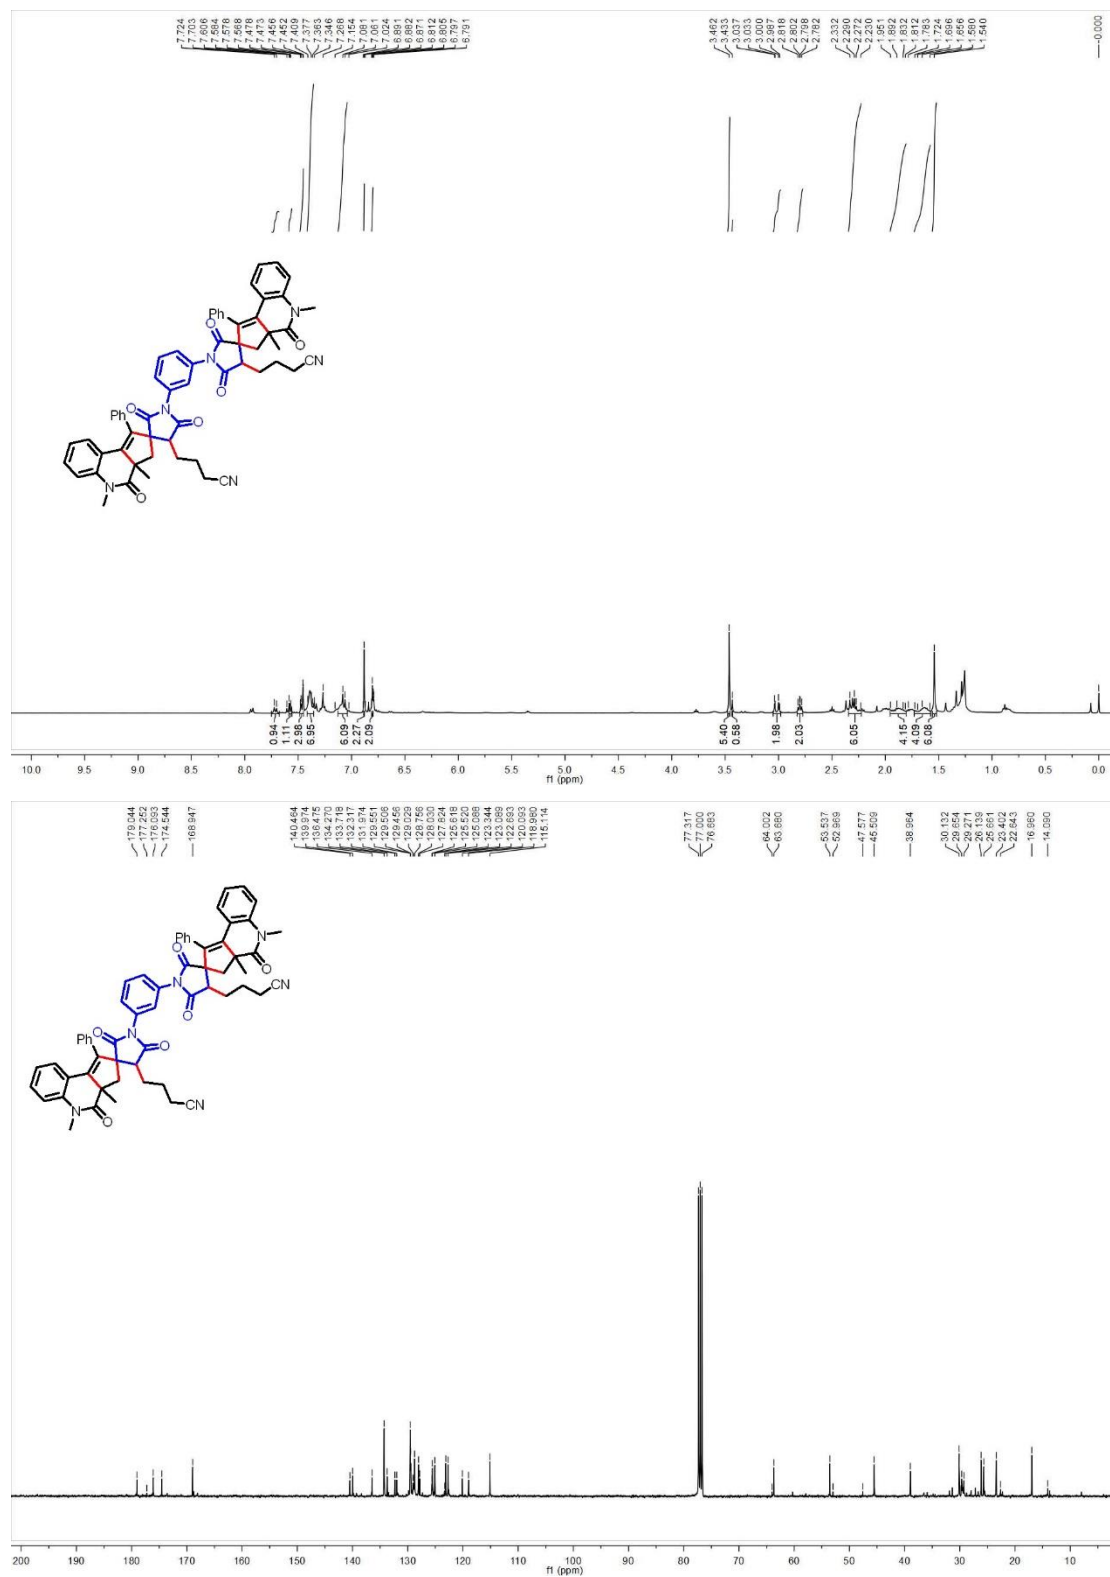

**4-(3a,5-Dimethyl-2',4,5'-trioxo-1-phenyl-3,3a,4,4',5,5'-hexahydro-2'H-spiro[cyclopenta[c]quinoline-2,3'-furan]-4'-yl)butanenitrile (4m)**

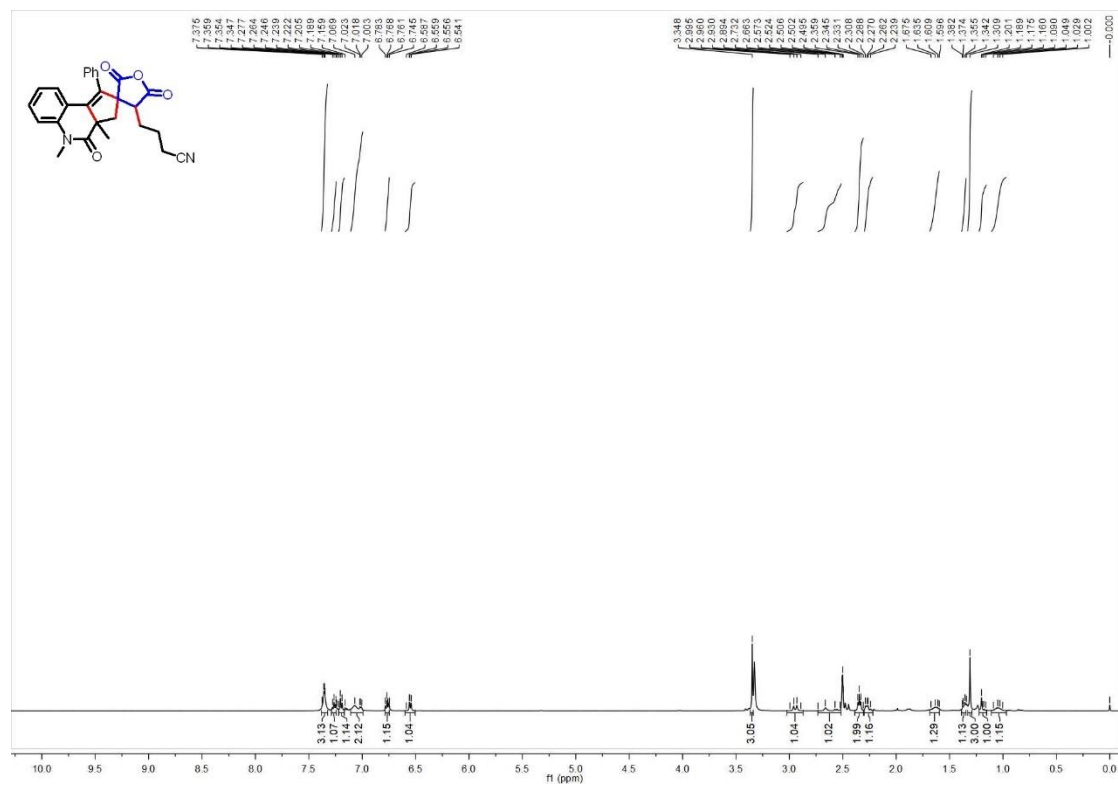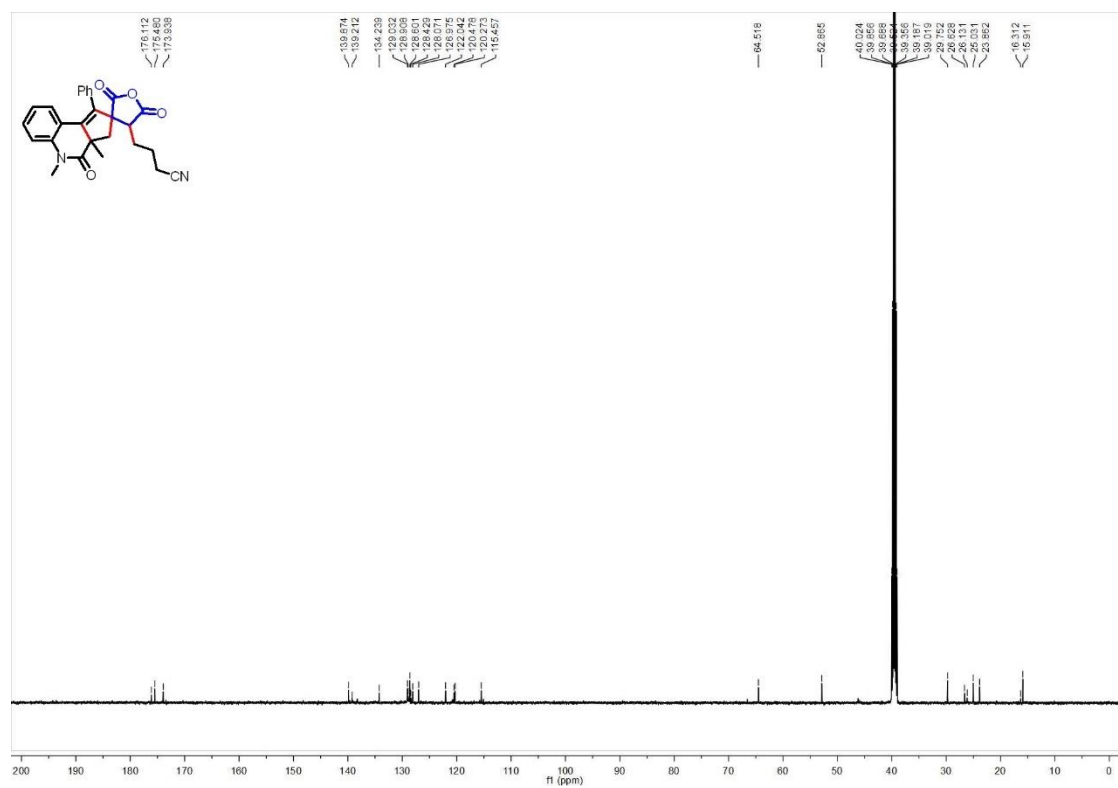

**4-(3a,5-Dimethyl-1',4,4'-trioxo-1-phenyl-3,3a,3',4,4',5-hexahydro-1'H-spiro[cyclopenta[c]quinoline-2,2'-naphthalen]-3'-yl)butanenitrile (4n)**

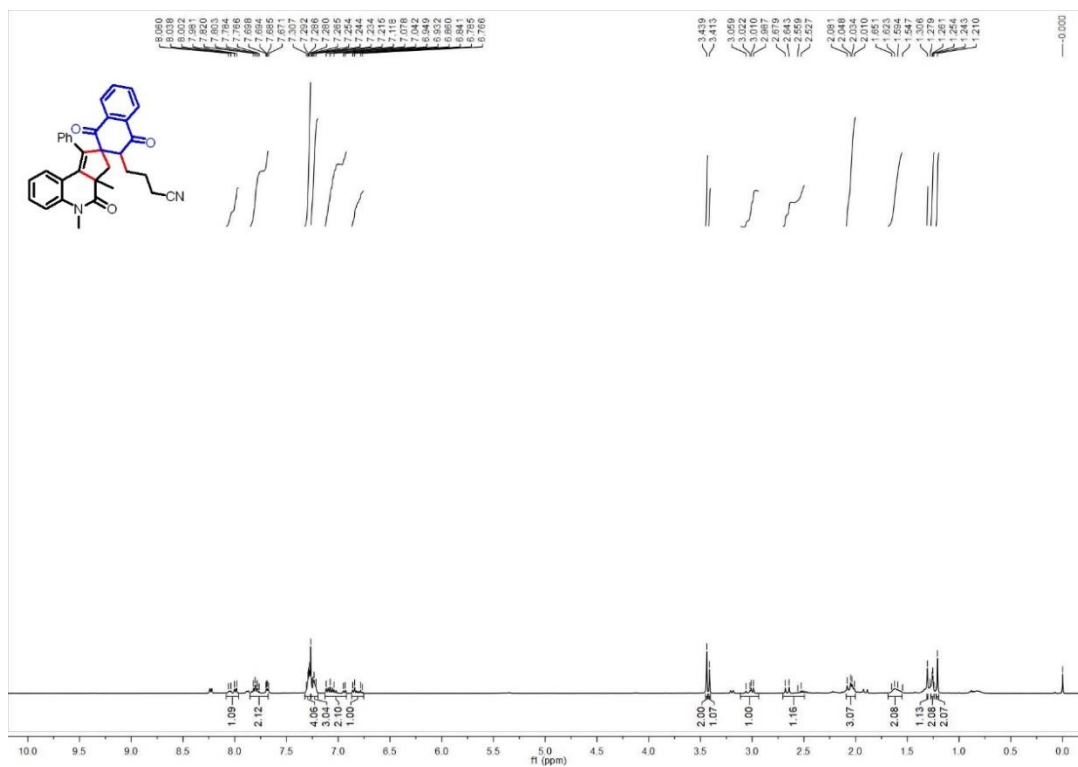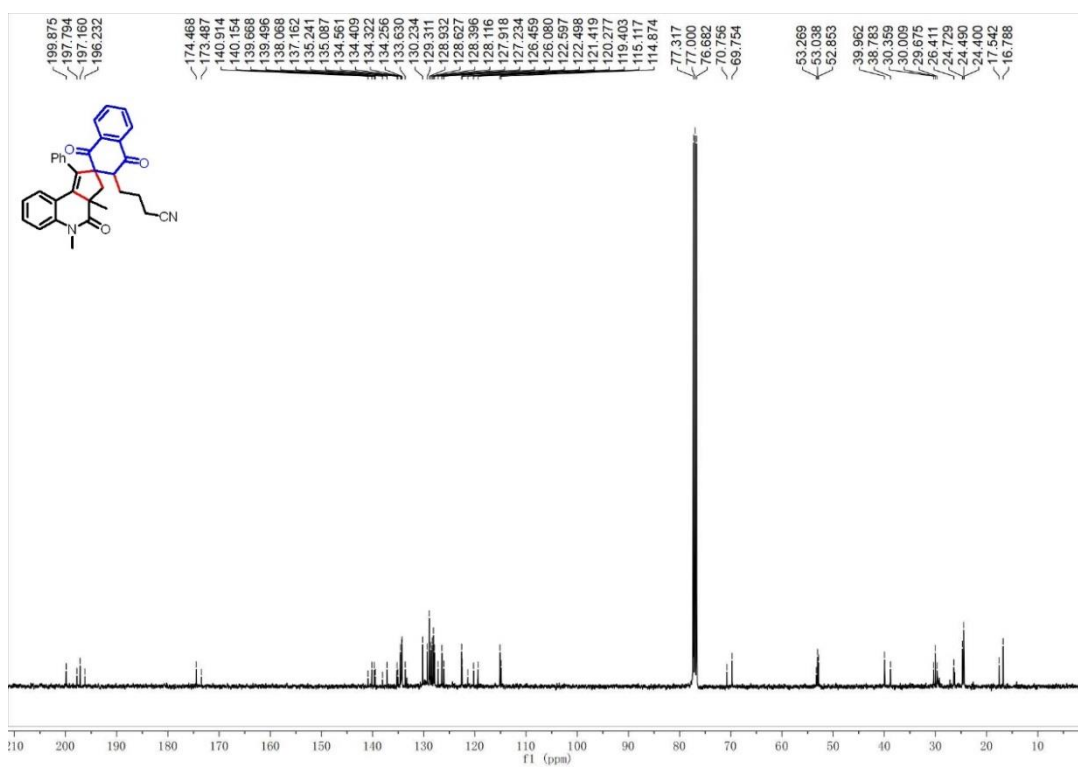

**4-(1'-Benzyl-3a,5,8-trimethyl-2',4,5'-trioxo-1-phenyl-3,3a,4,5-tetrahydrospiro[cyclopenta[c]quinoline-2,3'-pyrrolidin]-4'-yl)butanenitrile (4o)**

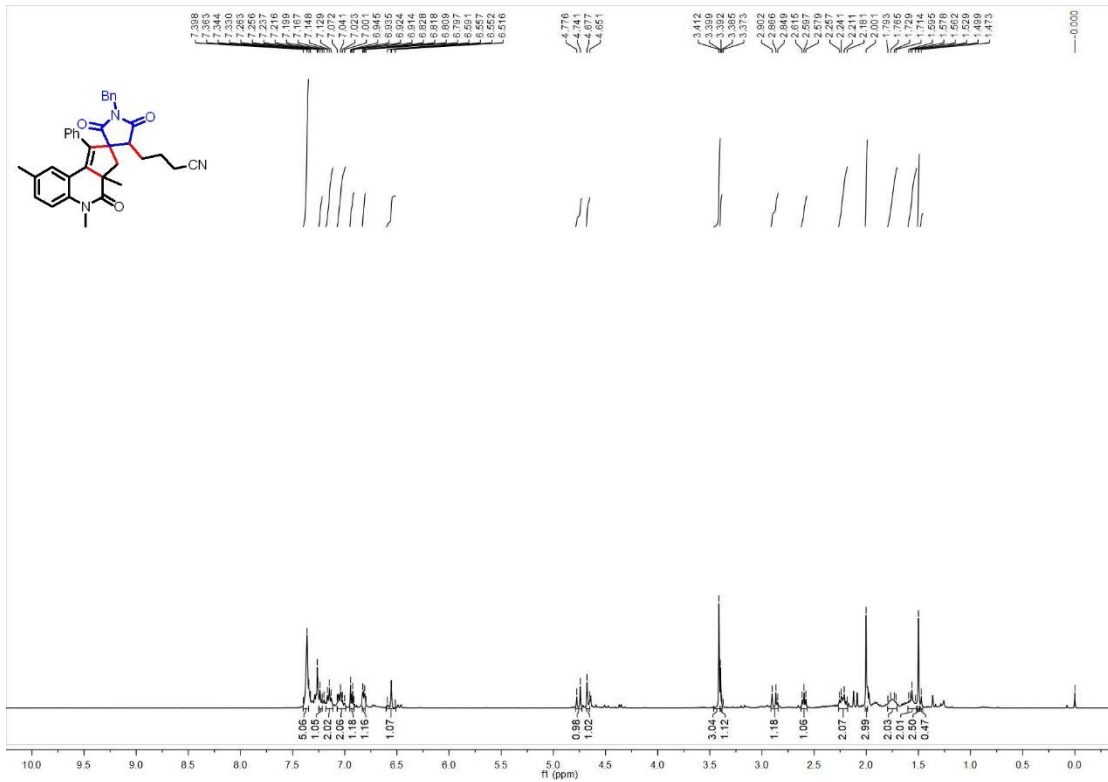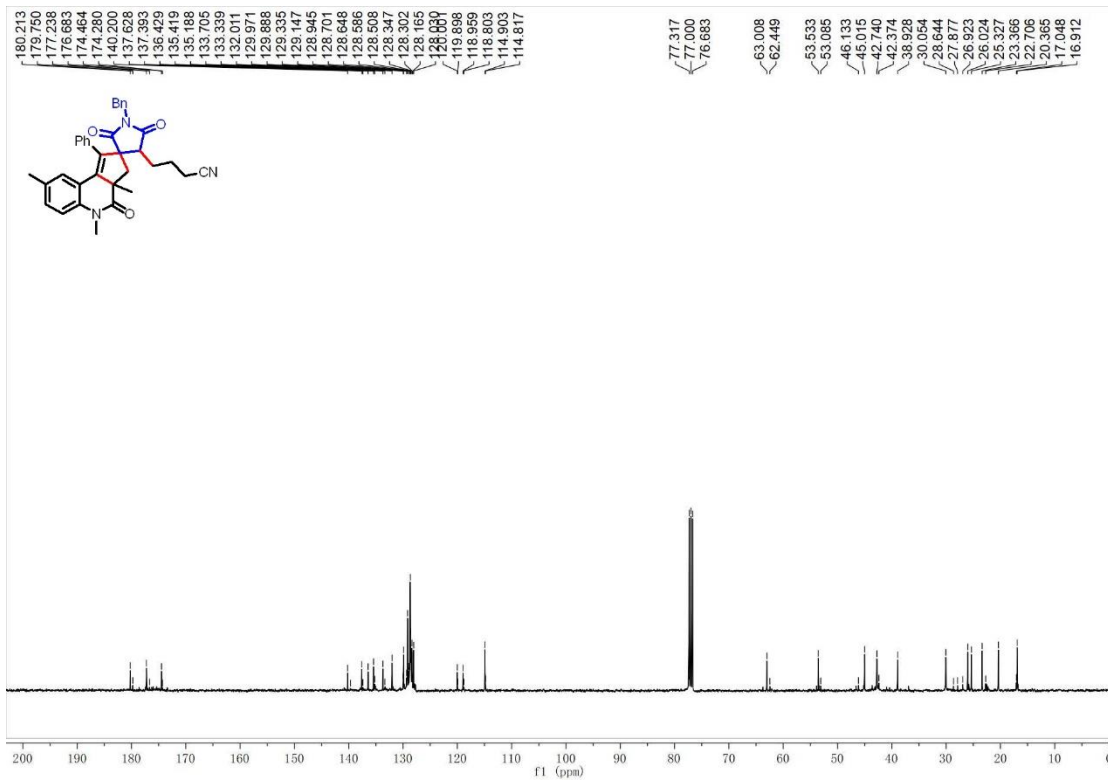





**4-(1'-Benzyl-8-chloro-3a,5-dimethyl-2',4,5'-trioxo-1-phenyl-3,3a,4,5-tetrahydrospiro[cyclopenta[c]quinoline-2,3'-pyrrolidin]-4'-yl)butanenitrile (4q)**

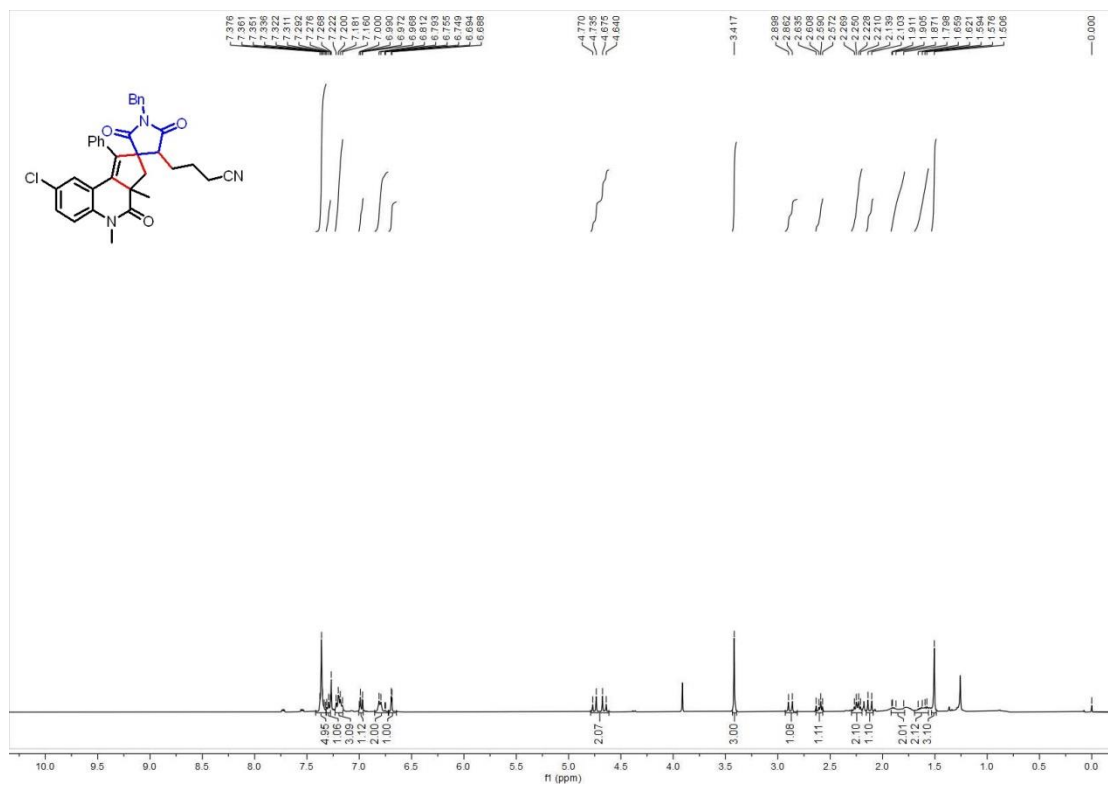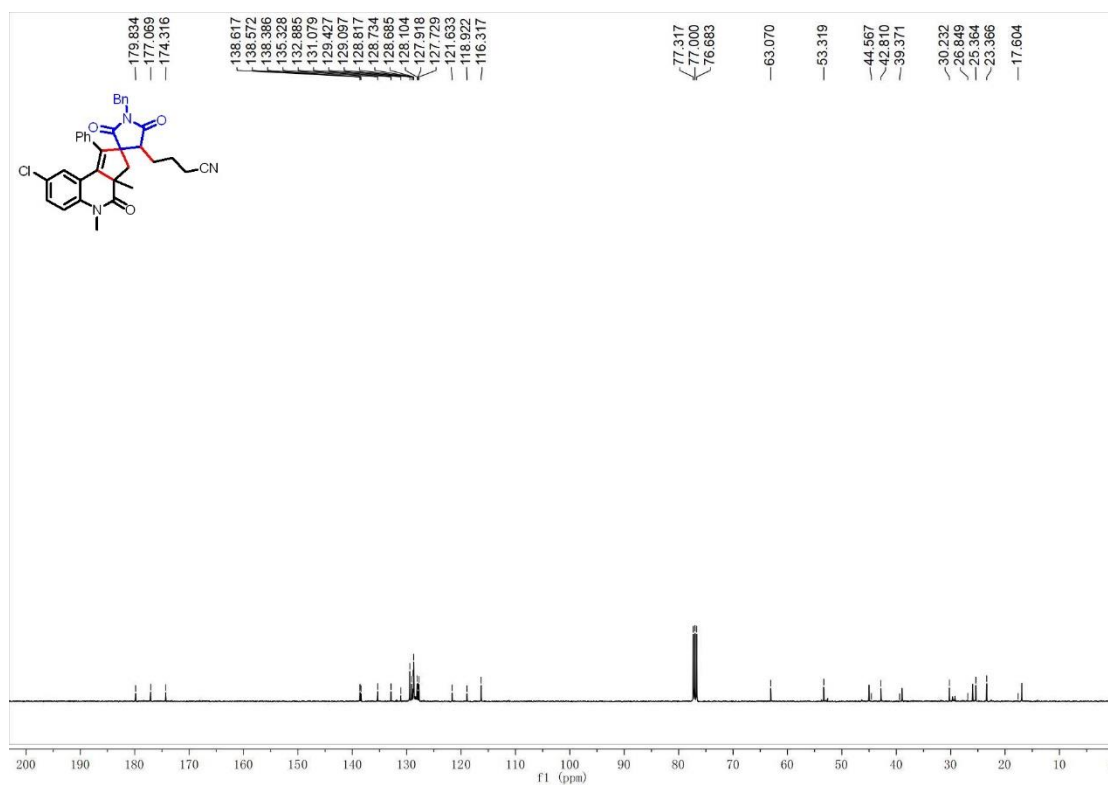

**4-(1'-Benzyl-7-chloro-3a,5-dimethyl-2',4,5'-trioxo-1-phenyl-3,3a,4,5-tetrahydrospiro[cyclopenta[c]quinoline-2,3'-pyrrolidin]-4'-yl)butanenitrile (4r)**

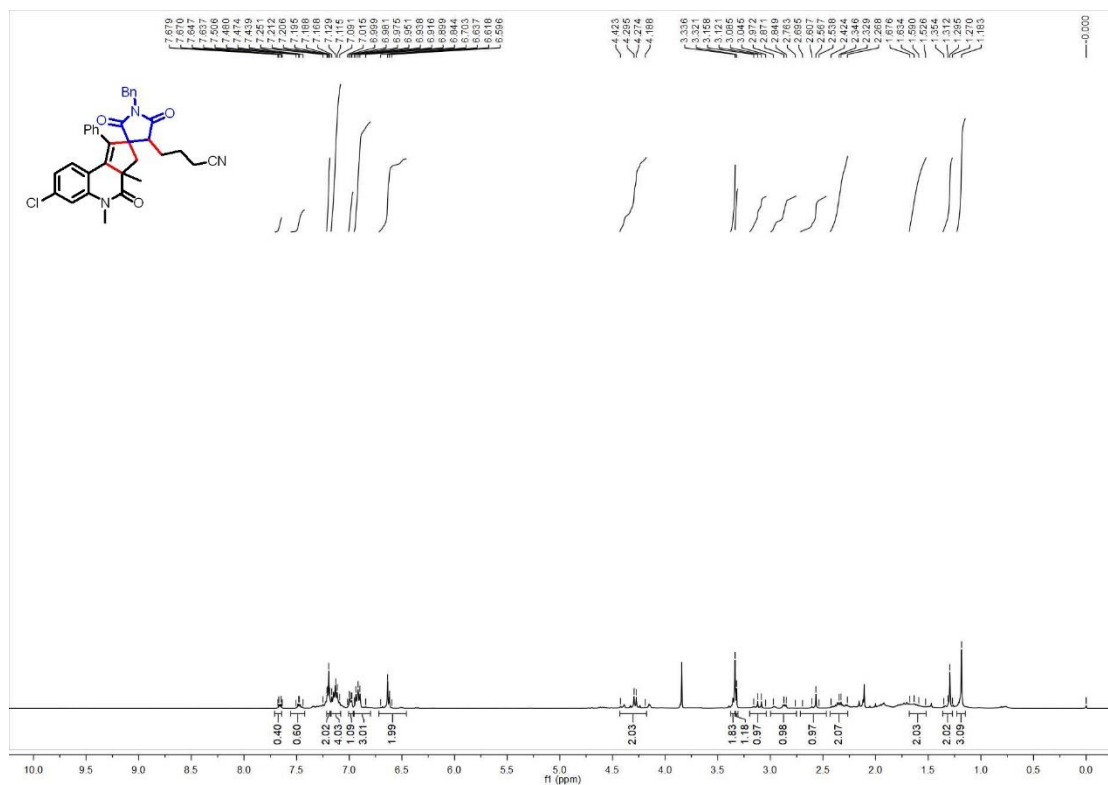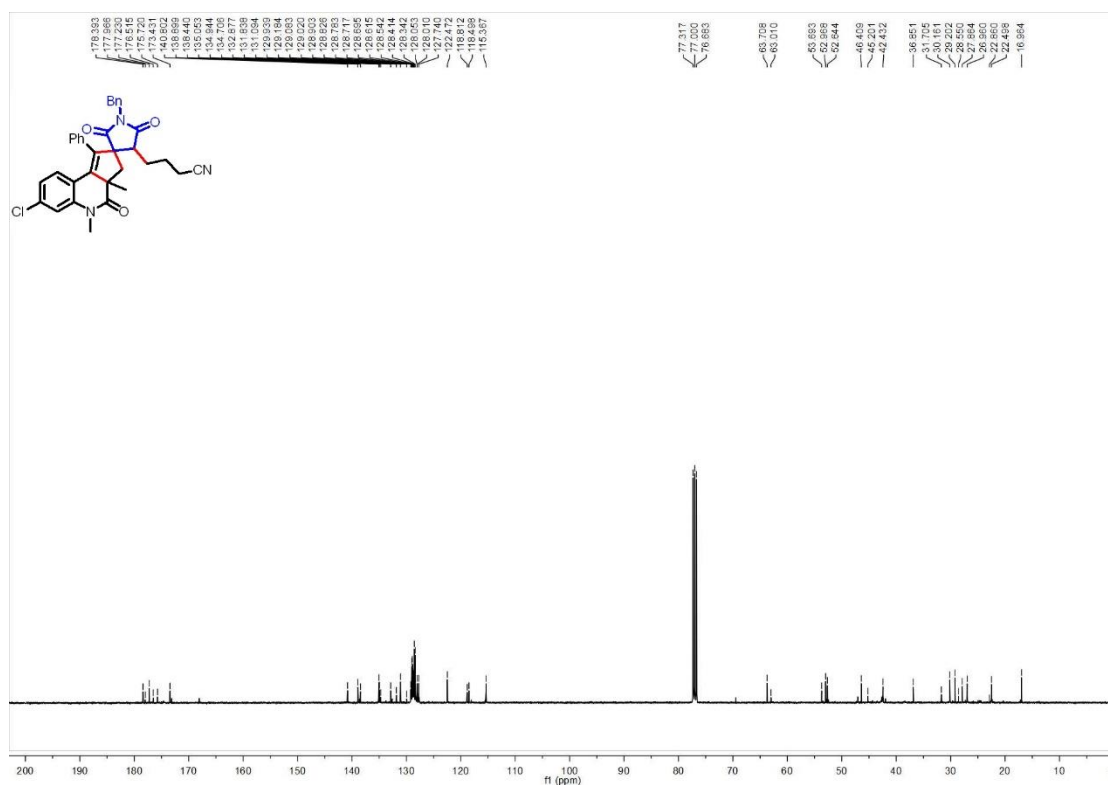

**4-(1'-Benzyl-3a,5-dimethyl-2',4,5'-trioxo-1-phenyl-8-(trifluoromethyl)-3,3a,4,5-tetrahydrospiro[cyclopenta[c]quinoline-2,3'-pyrrolidin]-4'-yl)butanenitrile (4s)**

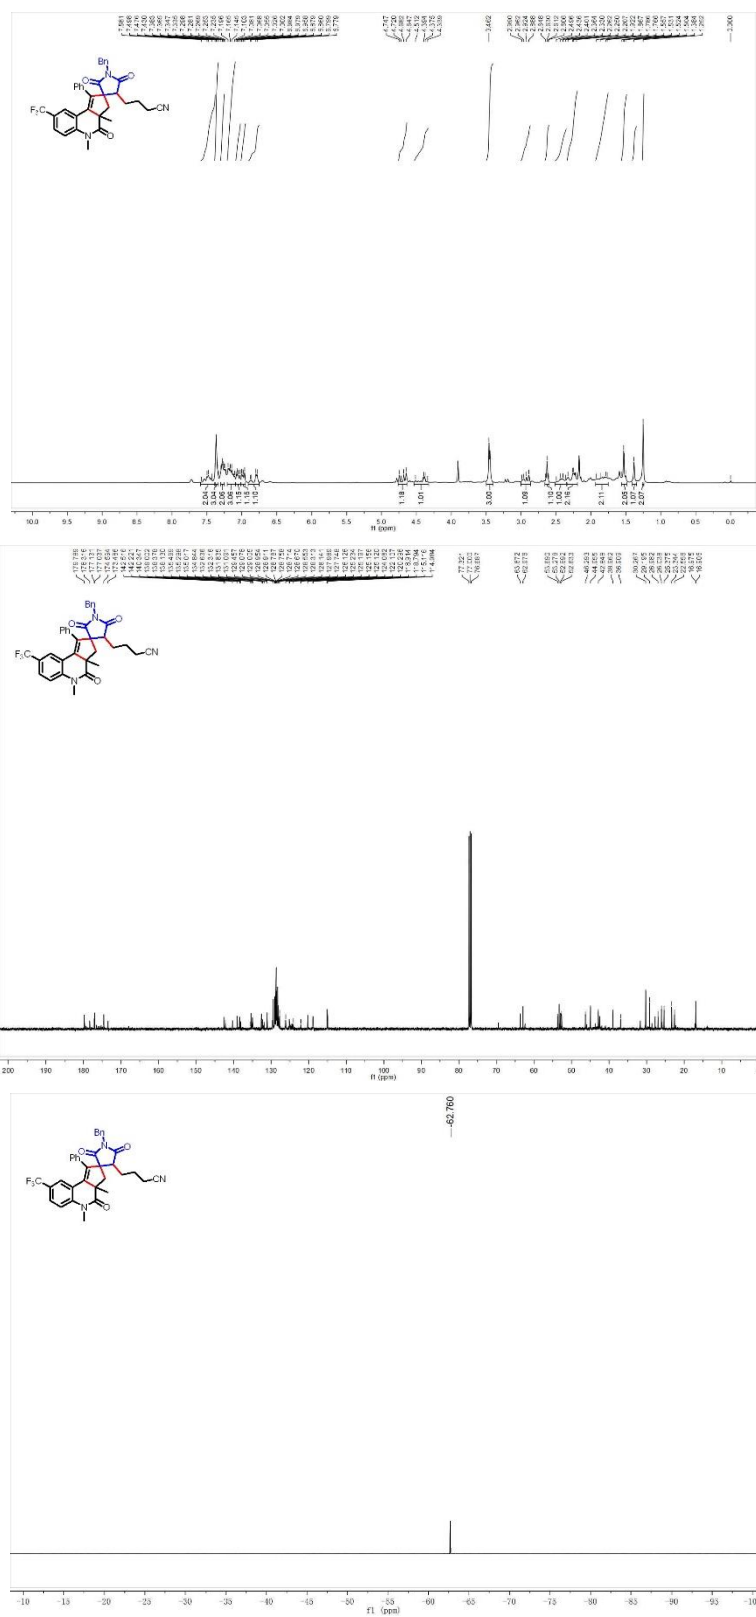

**4-(1'-Benzyl-1-(4-methoxyphenyl)-3a,5-dimethyl-2',4,5'-trioxo-3,3a,4,5-tetrahydrospiro[cyclopenta[c]quinoline-2,3'-pyrrolidin]-4'-yl)butanenitrile (4t)**

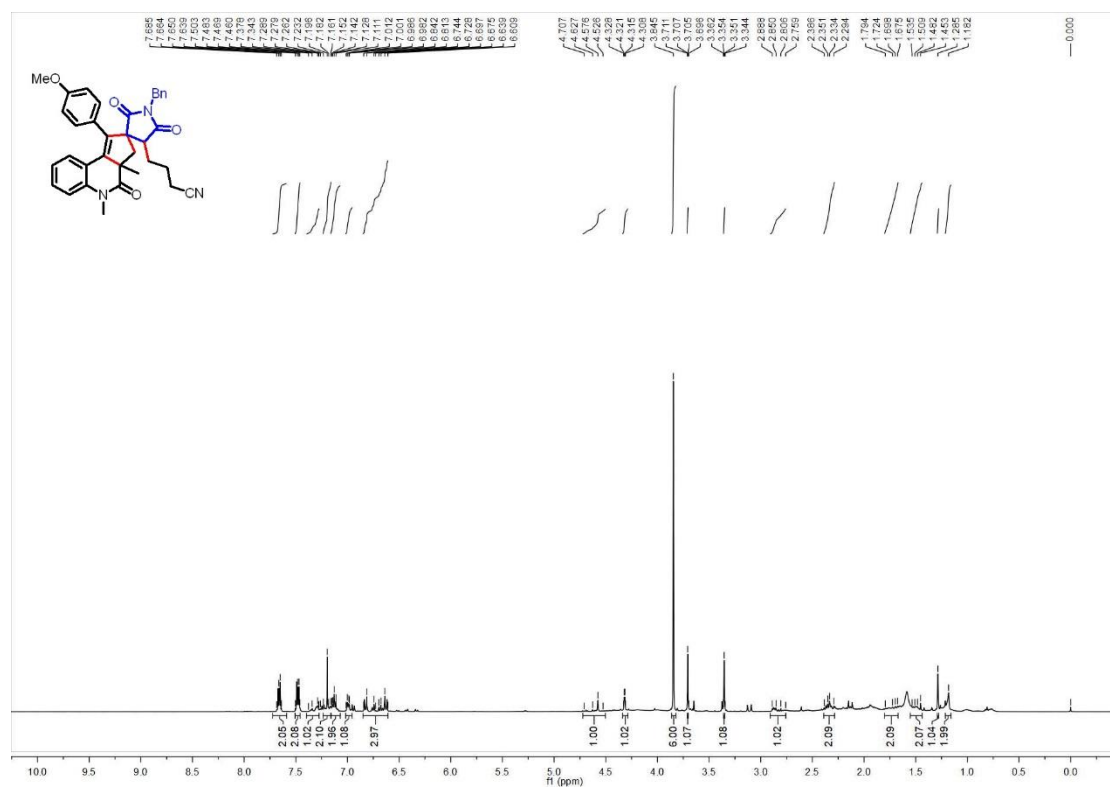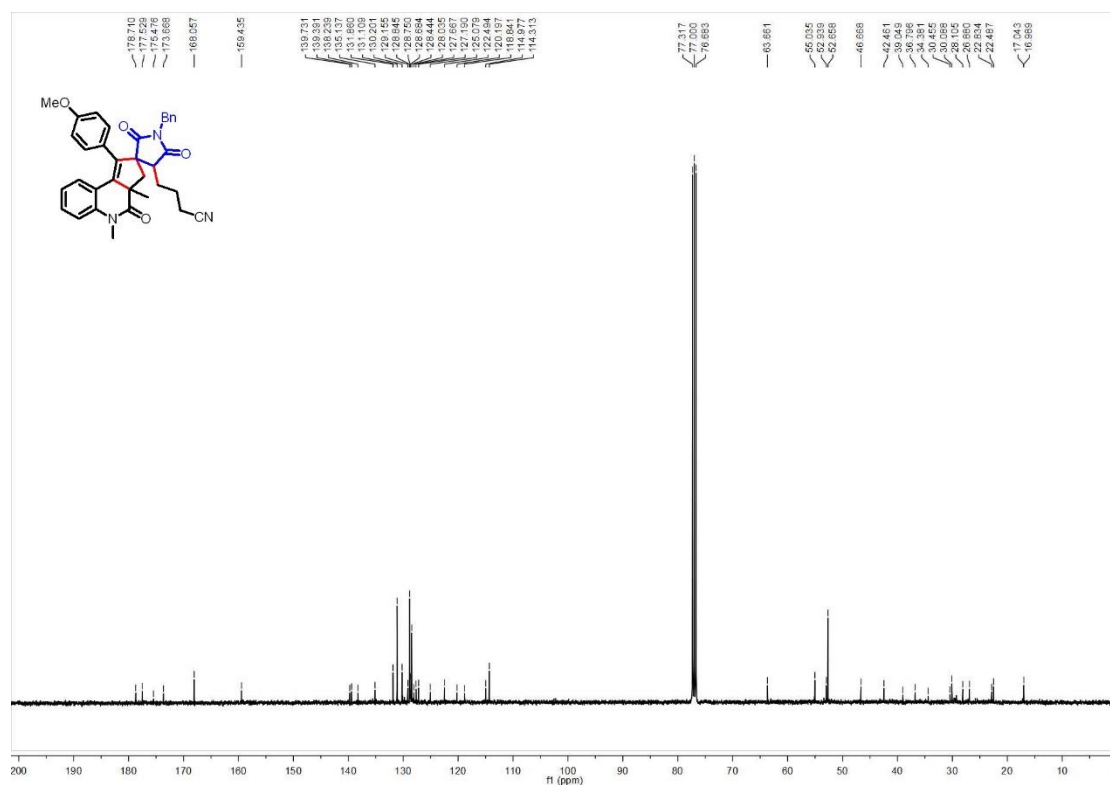

**4-(1'-Benzyl-1-(4-butylphenyl)-3a,5-dimethyl-2',4,5'-trioxo-3,3a,4,5-tetrahydrospiro[cyclopenta[c]quinoline-2,3'-pyrrolidin]-4'-yl)butanenitrile (4u)**

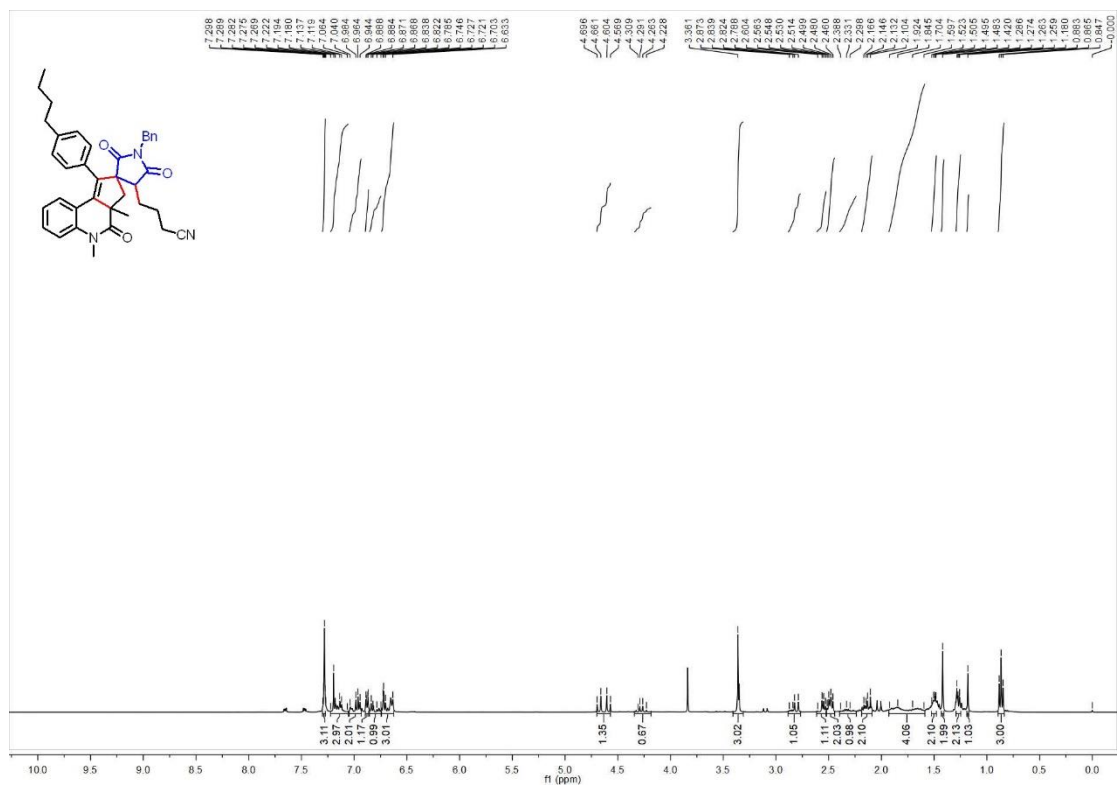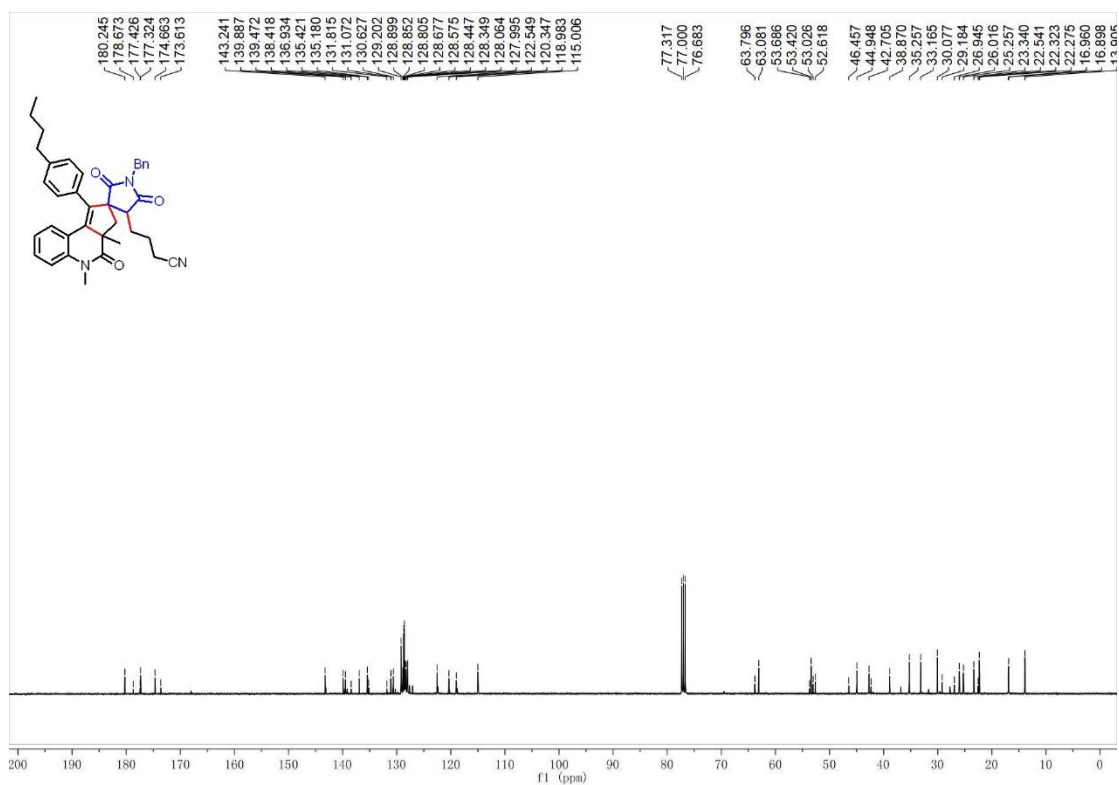

**4-(1'-Benzyl-1-(4-bromophenyl)-3a,5-dimethyl-2',4,5'-trioxo-3,3a,4,5-tetrahydrospiro[cyclopenta[c]quinoline-2,3'-pyrrolidin]-4'-yl)butanenitrile (4v)**

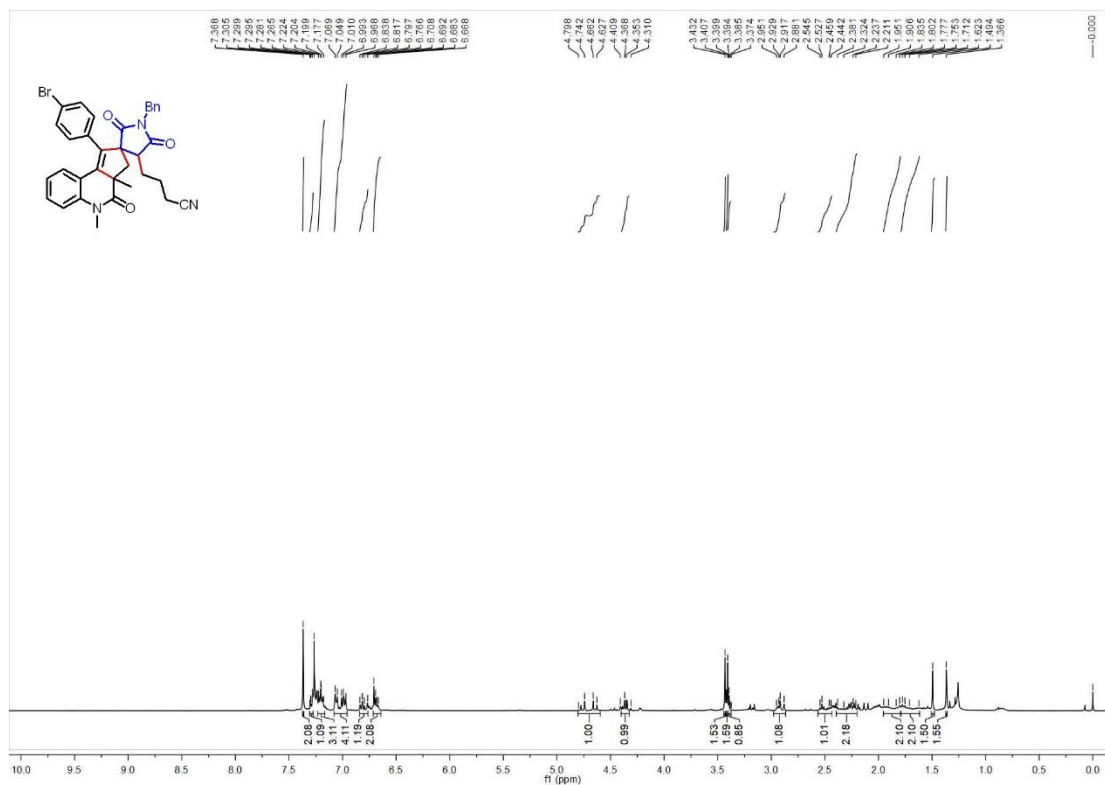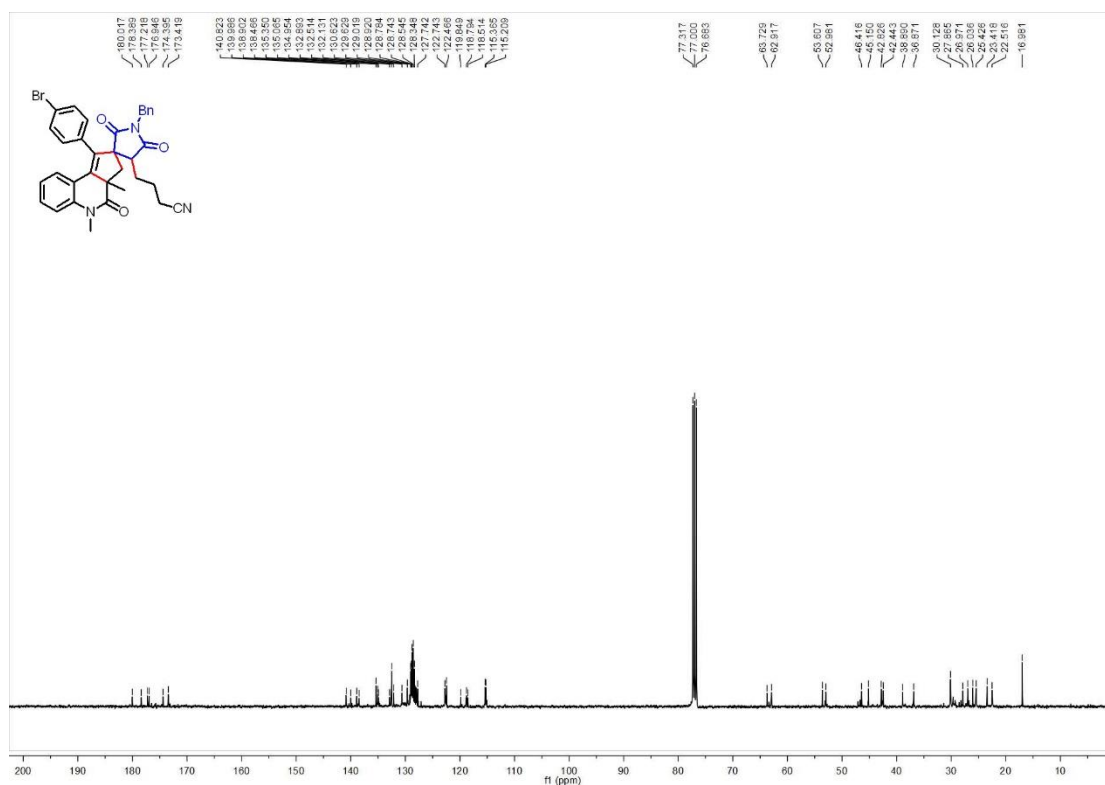

**4-(1'-Benzyl-3a,5-dimethyl-2',4,5'-trioxo-1-(thiophen-2-yl)-3,3a,4,5-tetrahydrospiro[cyclopenta[c]quinoline-2,3'-pyrrolidin]-4'-yl)butanenitrile (4w)**

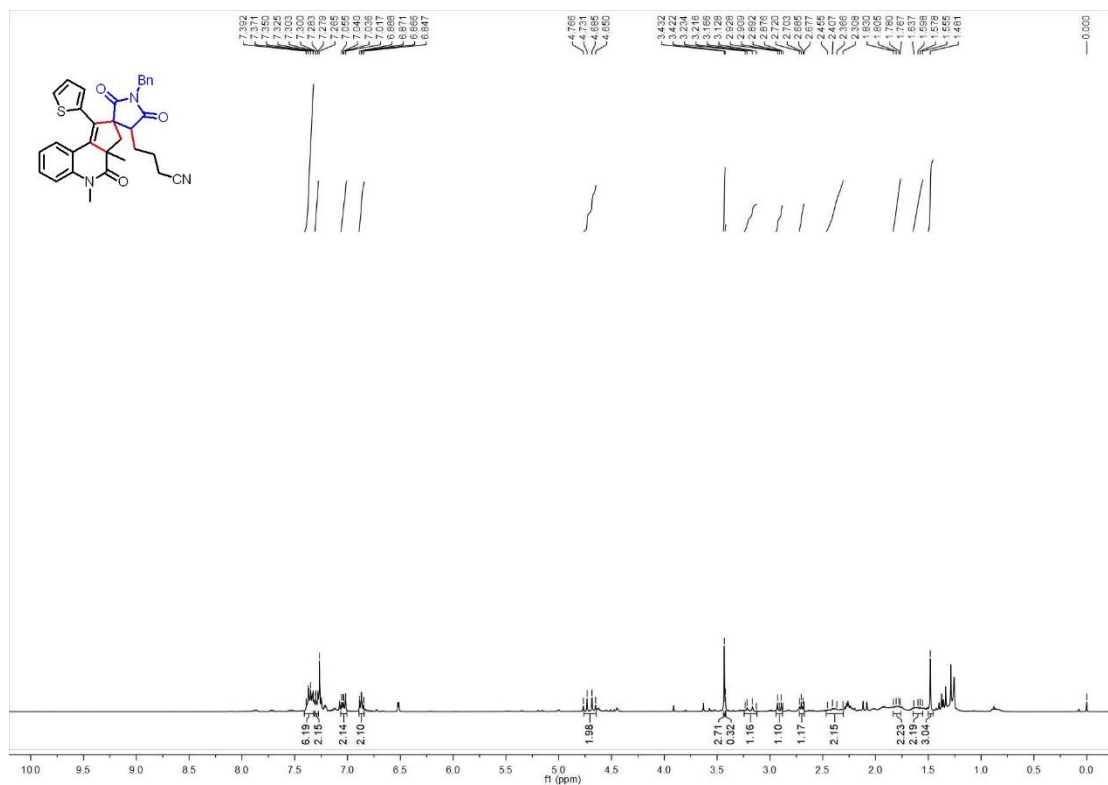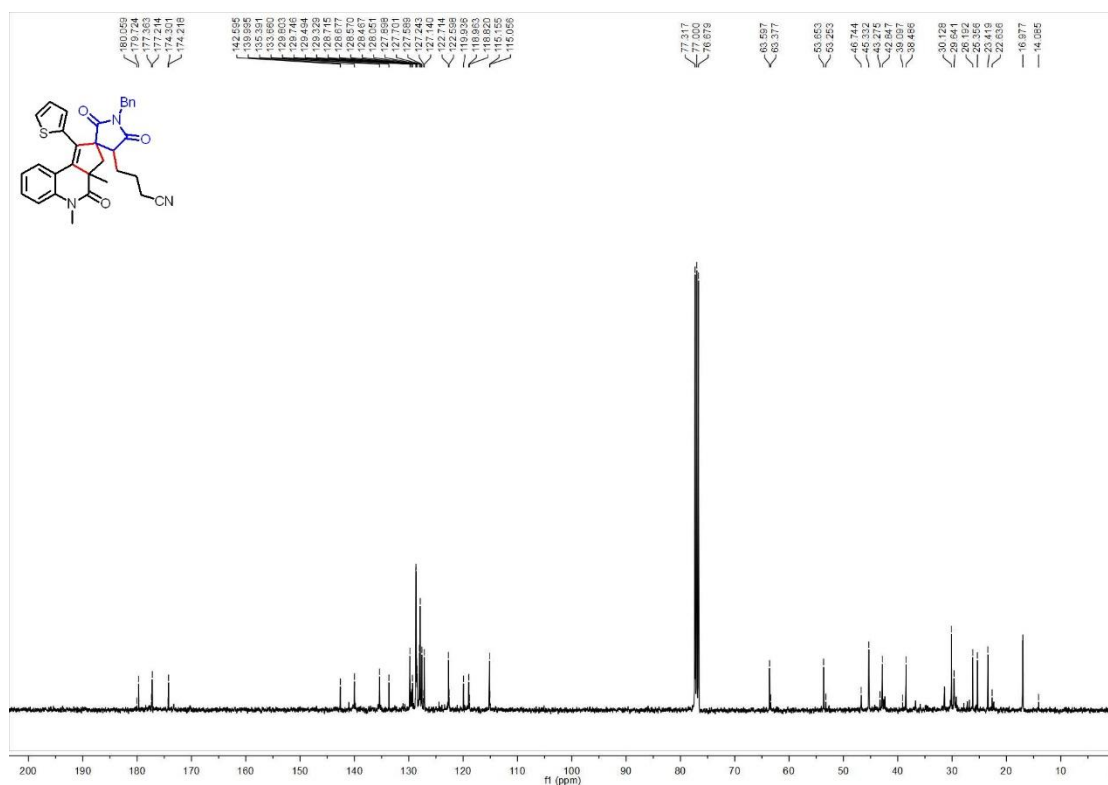

**4-(1'-Benzyl-1-butyl-3a,5-dimethyl-2',4,5'-trioxo-3,3a,4,5-tetrahydrospiro[cyclopenta[c]quinoline-2,3'-pyrrolidin]-4'-yl)butanenitrile (4x)**

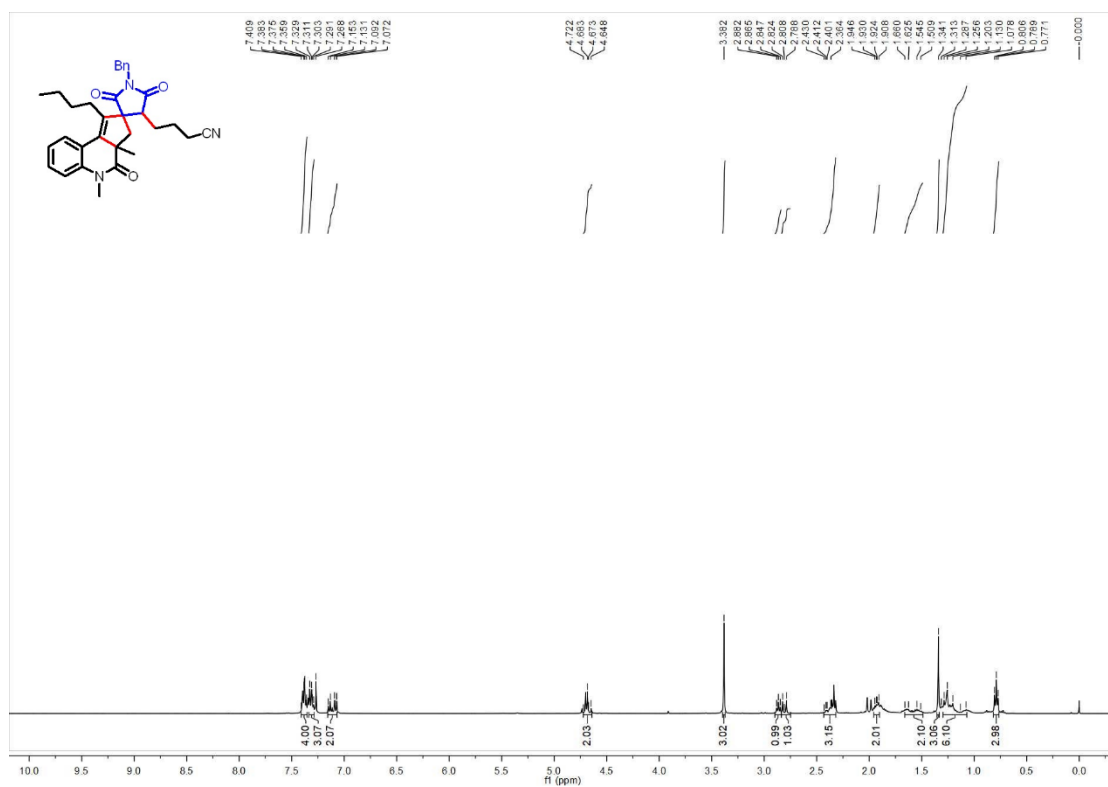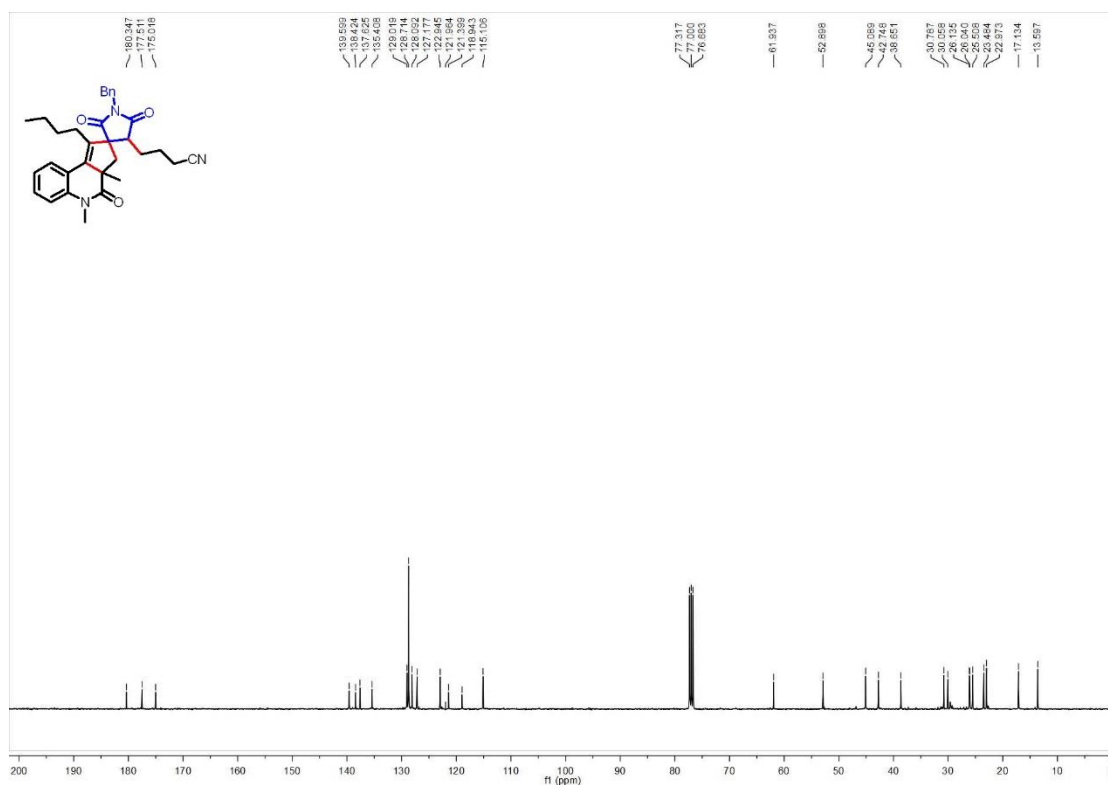



**4-(1'-Benzyl-1-((8*R*,9*S*,10*R*,14*S*,17*S*)-17-hydroxy-10,13-dimethyl-3-oxo-2,3,6,7,8,9,10,11,12,13,14,15,16,17-tetradecahydro-1*H*-cyclopenta[*a*]phenanthren-17-yl)-3*a*,5-dimethyl-2',4,5'-trioxo-3,3*a*,4,5-tetrahydrospiro[cyclopenta[*c*]quinoline-2,3'-pyrrolidin]-4'-yl)butanenitrile (4y)**

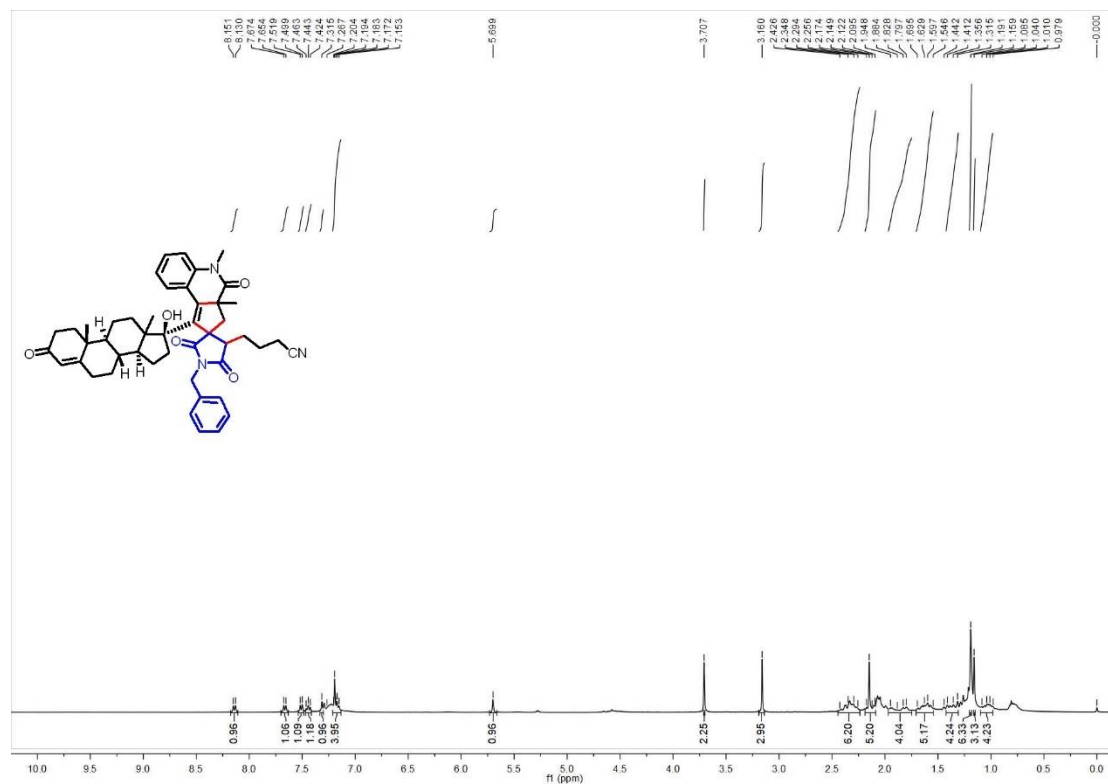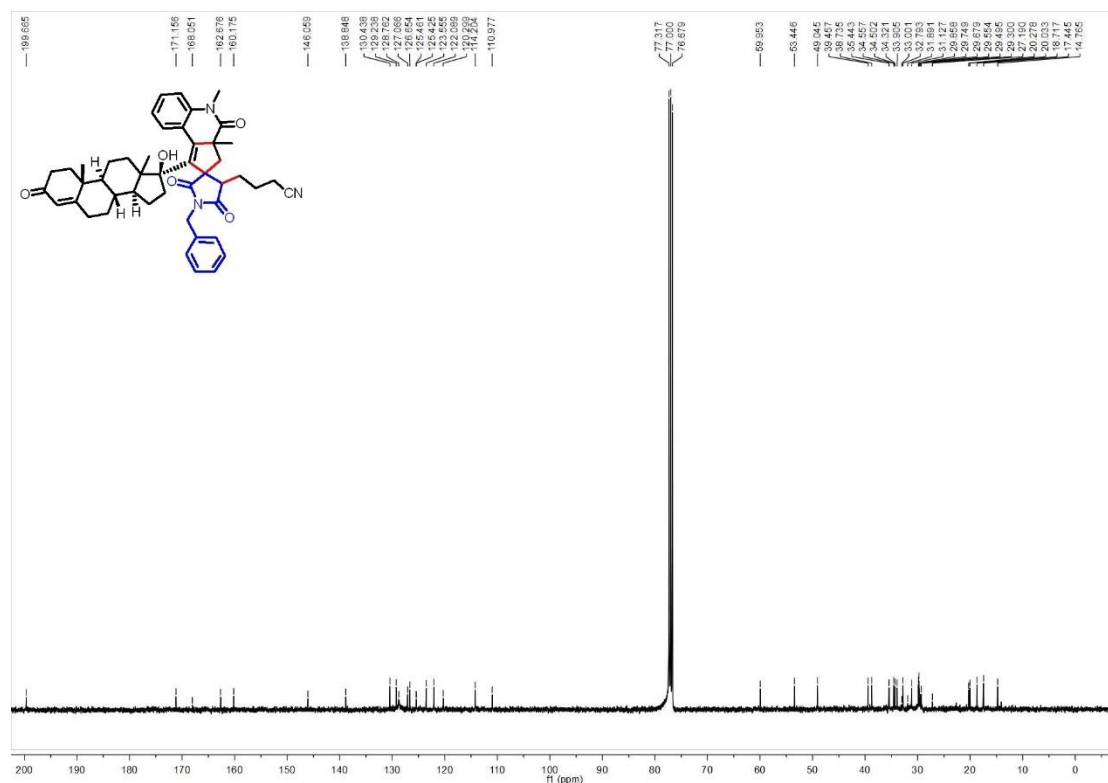

**4-(1',5-Dibenzyl-3a-methyl-2',4,5'-trioxo-1-phenyl-3,3a,4,5-tetrahydrospiro[cyclopenta[c]quinoline-2,3'-pyrrolidin]-4'-yl)butanenitrile (4z)**

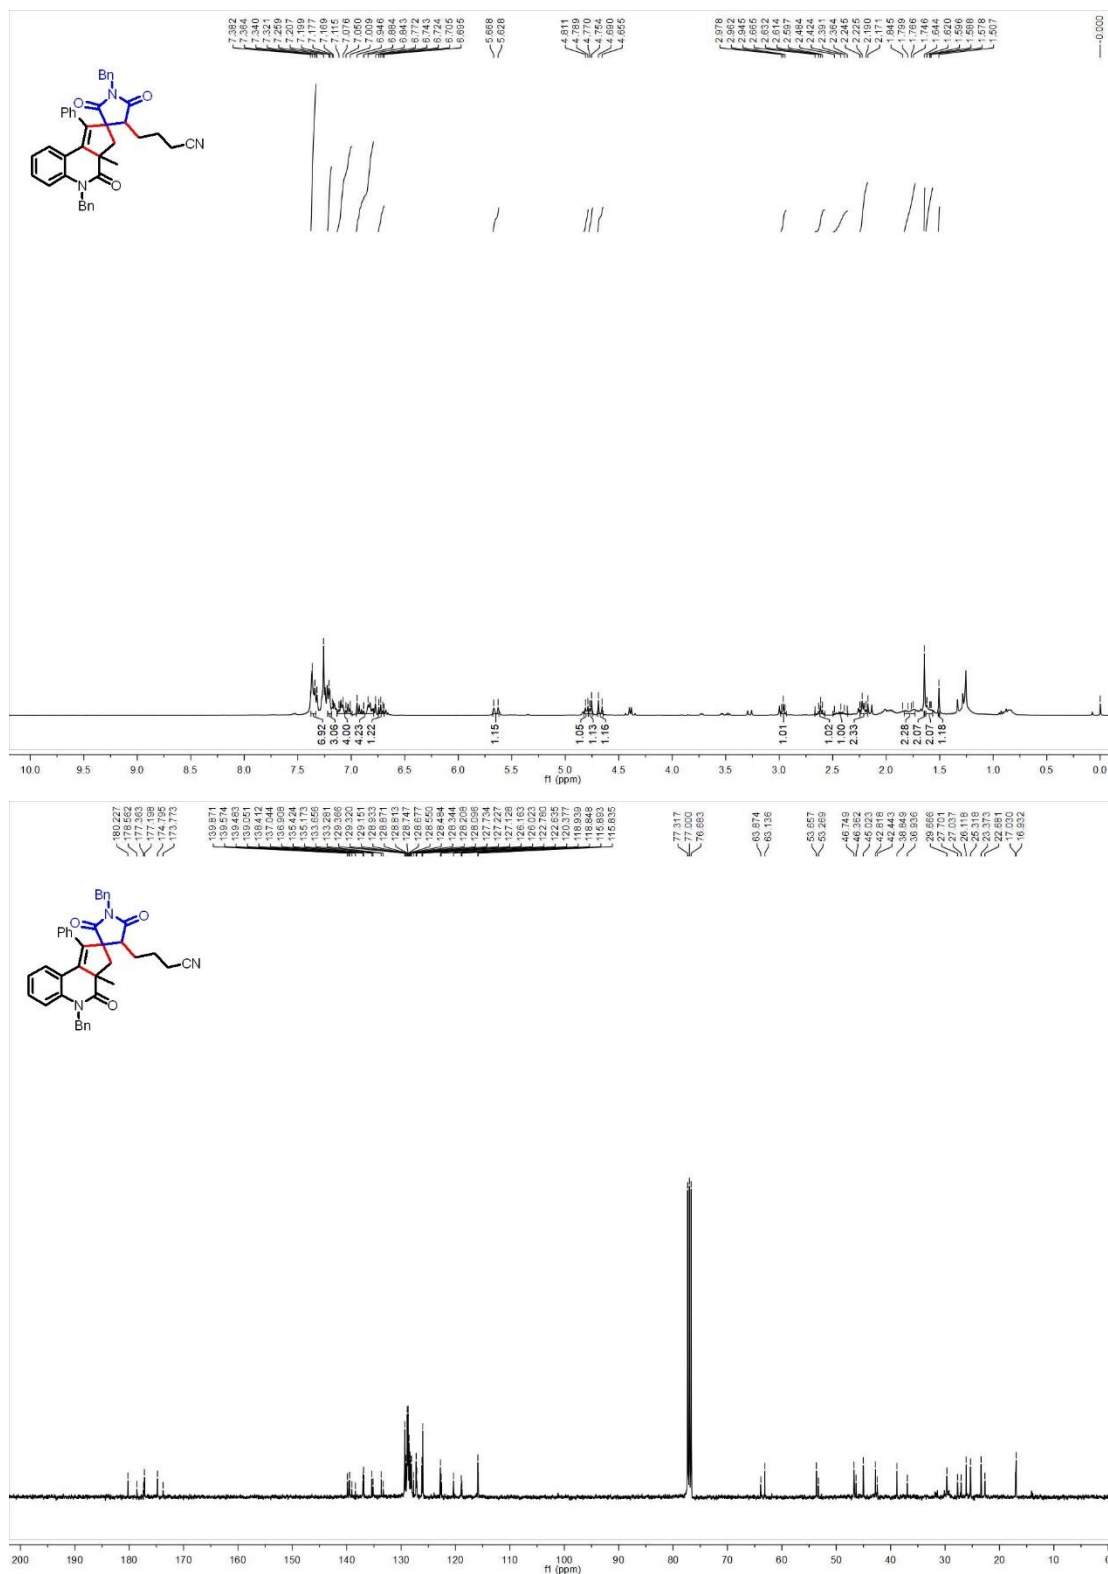

**4-(5-Allyl-1'-benzyl-3a-methyl-2',4,5'-trioxo-1-phenyl-3,3a,4,5-tetrahydrospiro[cyclopenta[c]quinoline-2,3'-pyrrolidin]-4'-yl)butanenitrile (4aa)**

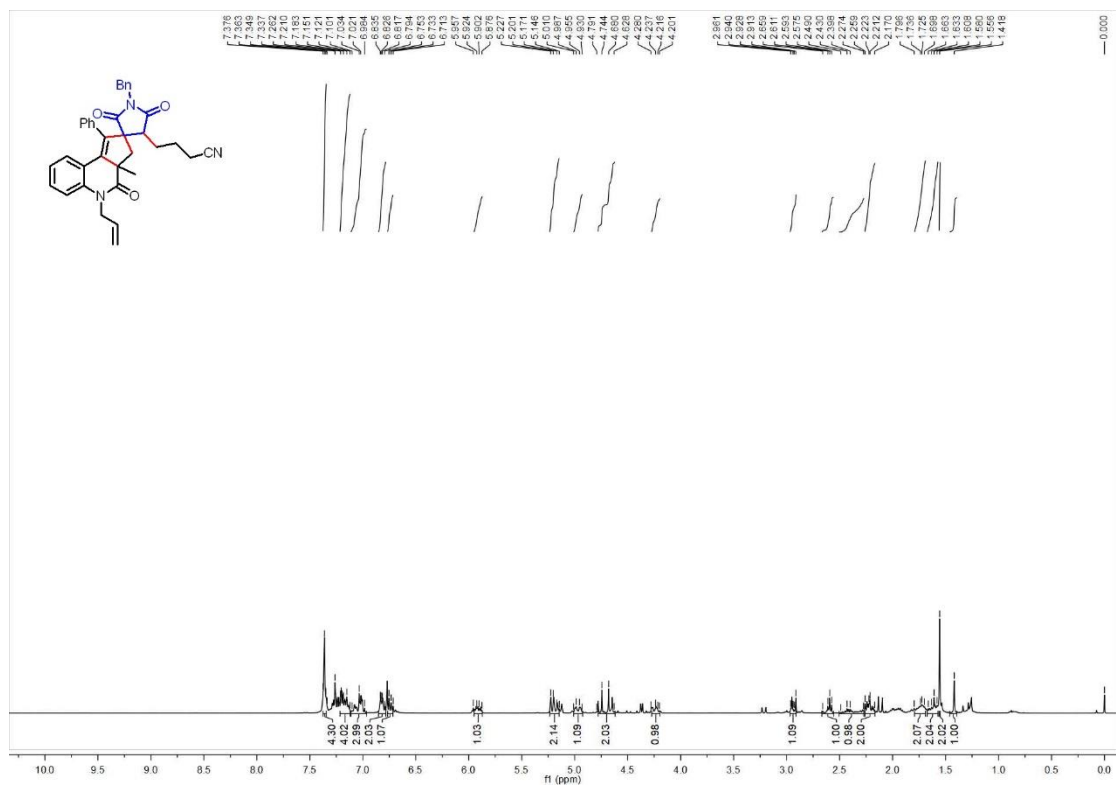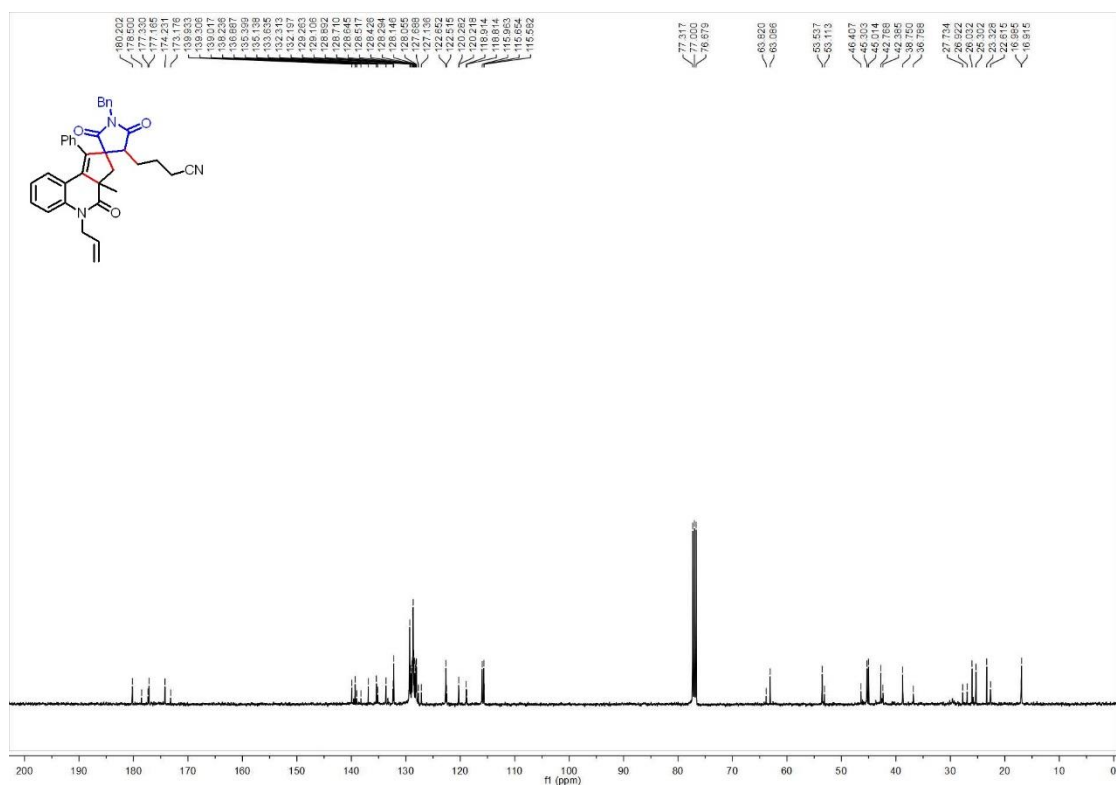

**4-(1'-Benzyl-3a-methyl-2',4,5'-trioxo-1-phenyl-5-tosyl-3,3a,4,5-tetrahydrospiro[cyclopenta[c]quinoline-2,3'-pyrrolidin]-4'-yl)butanenitrile (4ab)**

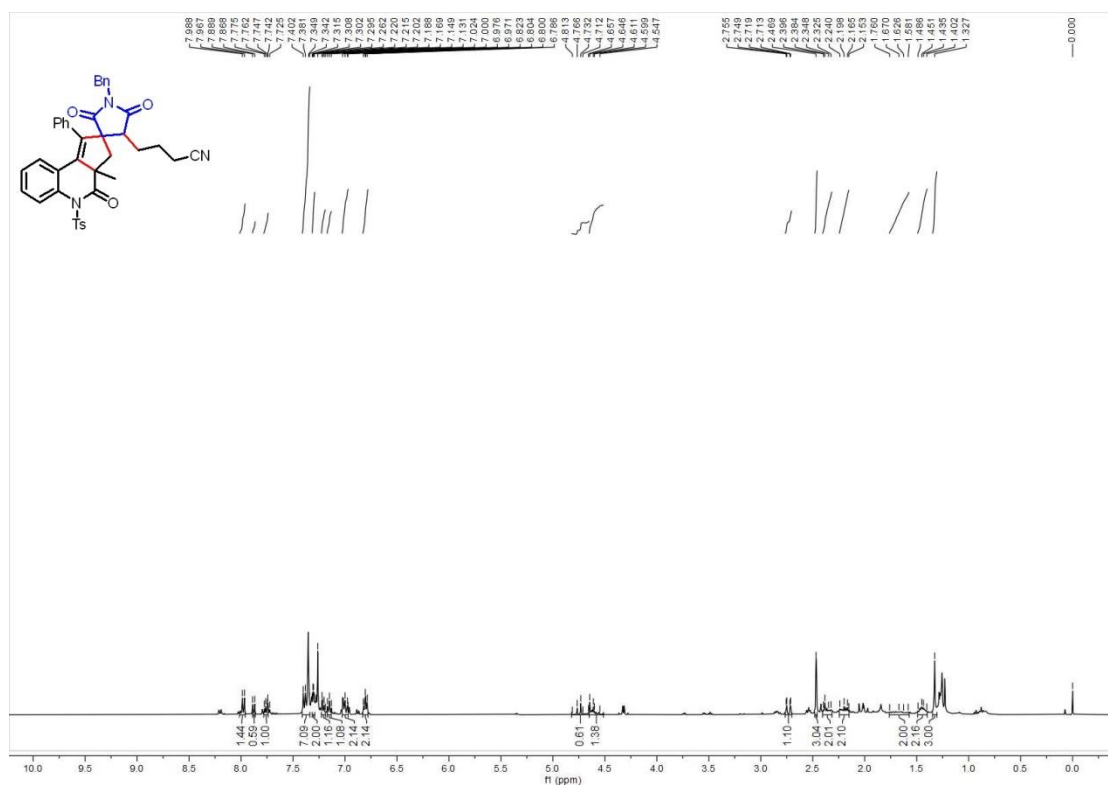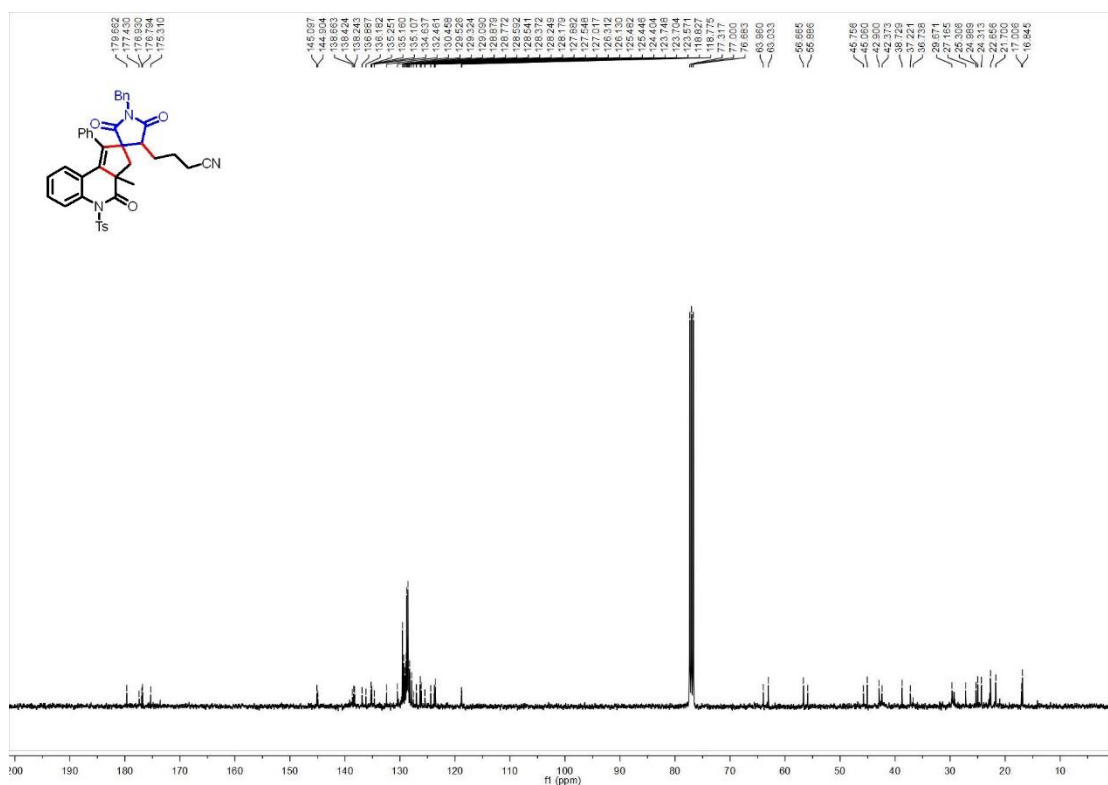

**4-(1',3a-Dibenzyl-5-methyl-2',4,5'-trioxo-1-phenyl-3,3a,4,5-tetrahydrospiro[cyclopenta[c]quinoline-2,3'-pyrrolidin]-4'-yl)butanenitrile (4ac)**

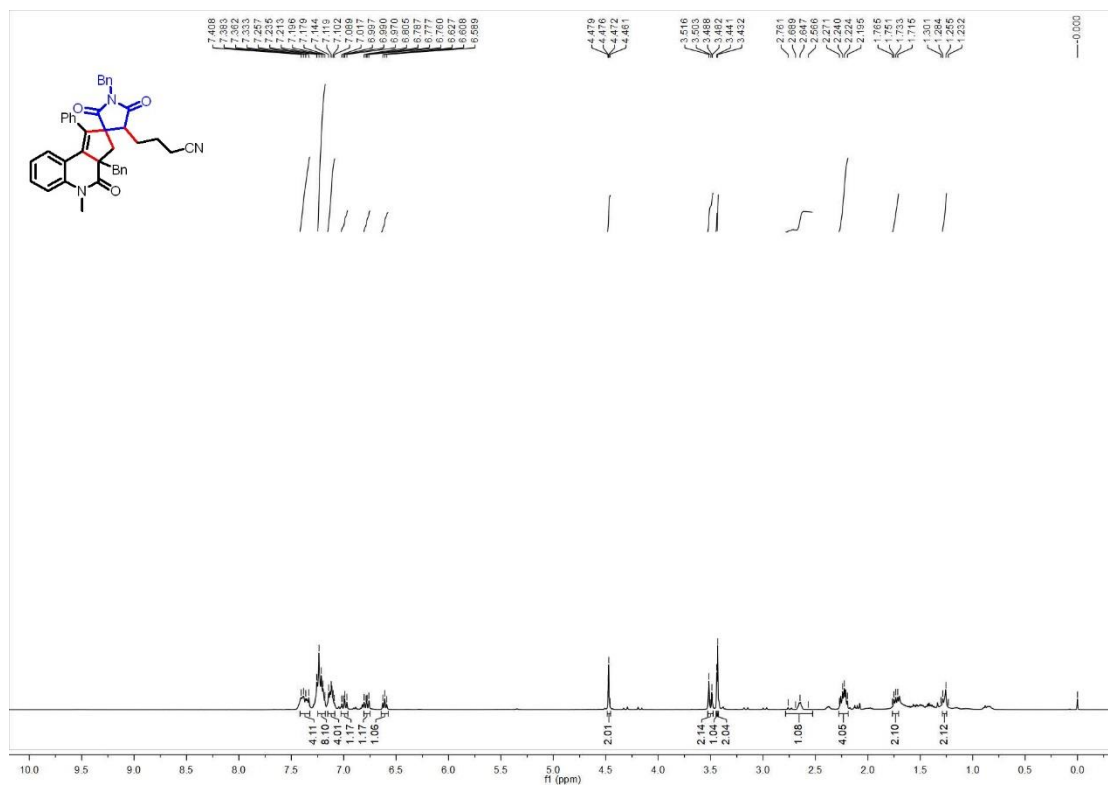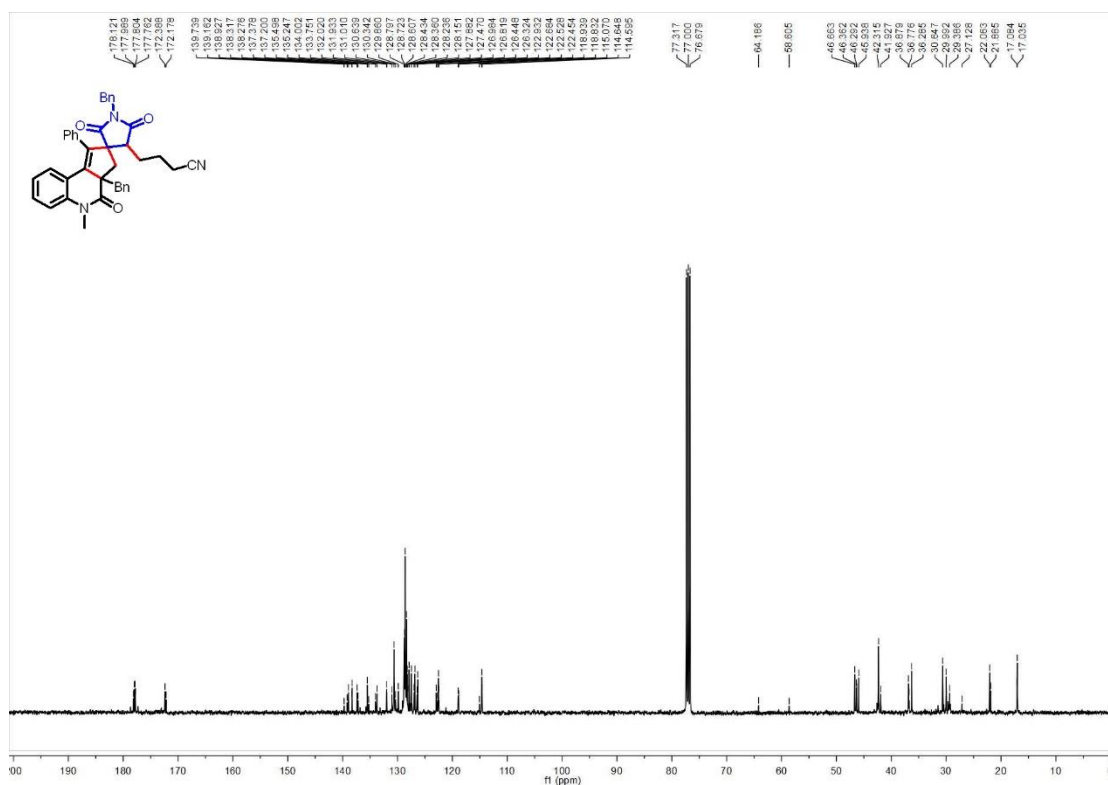

**4-(1'-(4-Bromophenyl)-2',5'-dihydroxy-3a,5-dimethyl-4-oxo-1-phenyl-3,3a,4,5-tetrahydrospiro[cyclopenta[c]quinoline-2,3'-pyrrolidin]-4'-yl)butanenitrile (5a)**

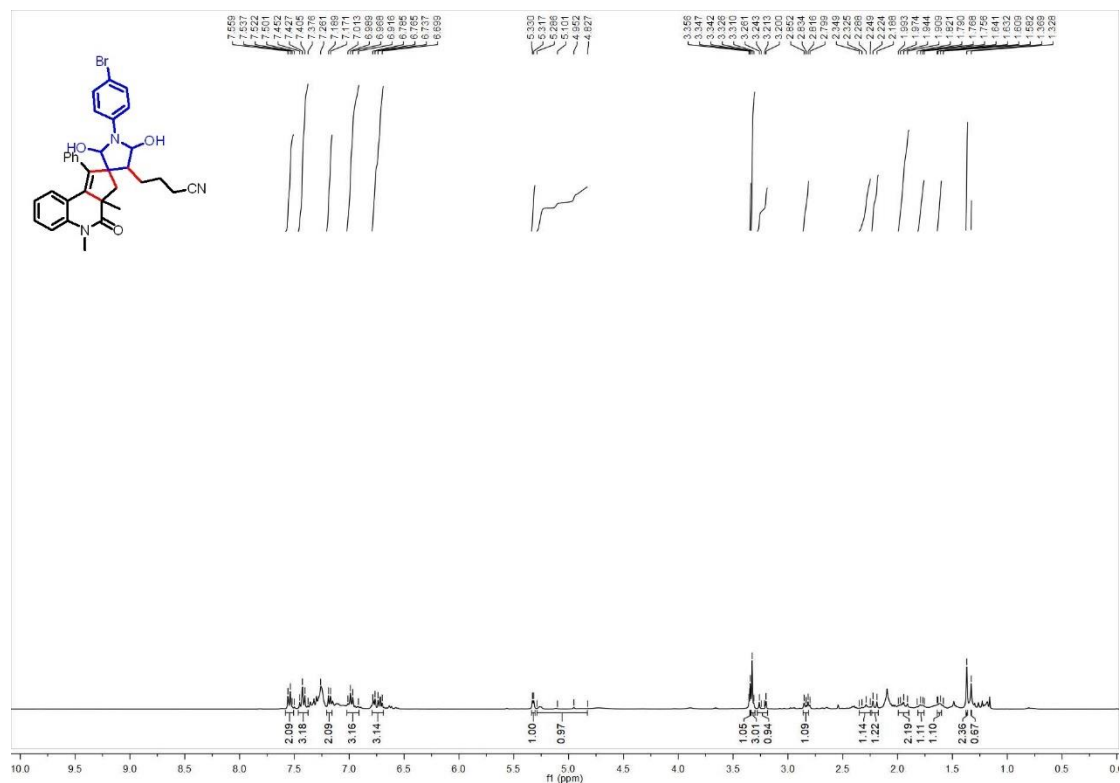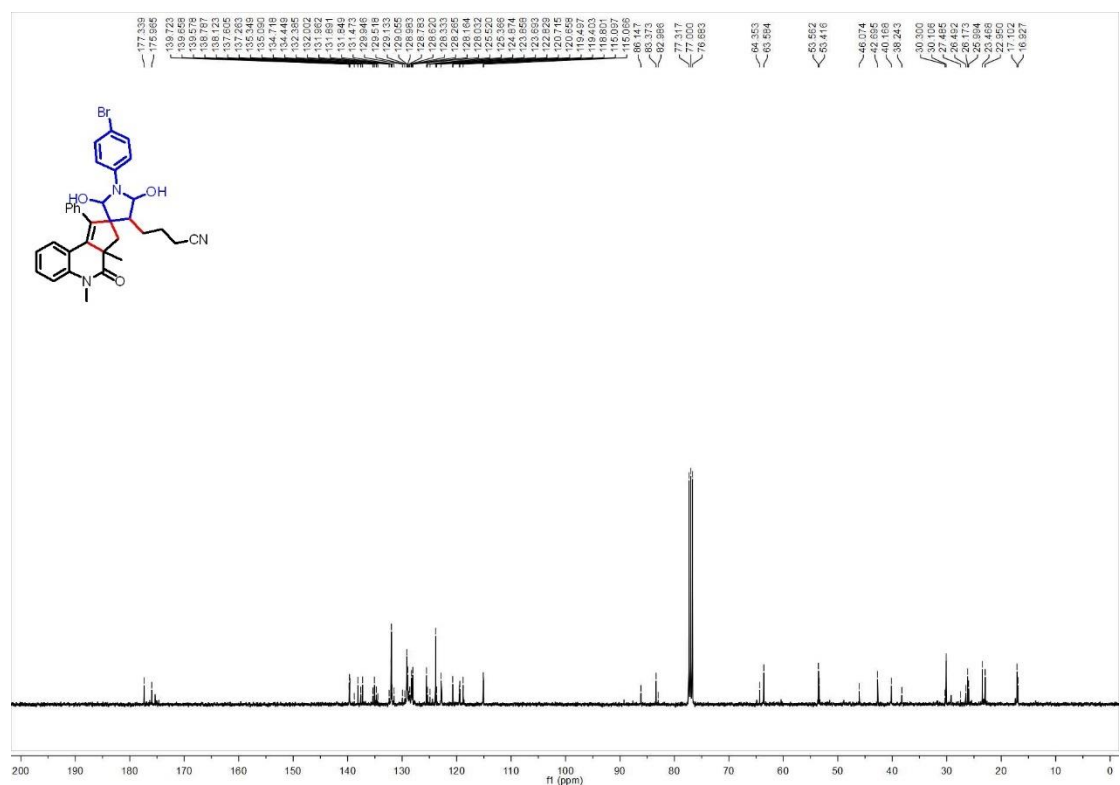

**Ethyl 4-(1'-benzyl-3a,5-dimethyl-2',4,5'-trioxo-1-phenyl-3,3a,4,5-tetrahydrospiro[cyclopenta[c]quinoline-2,3'-pyrrolidin]-4'-yl)butanoate (6a)**

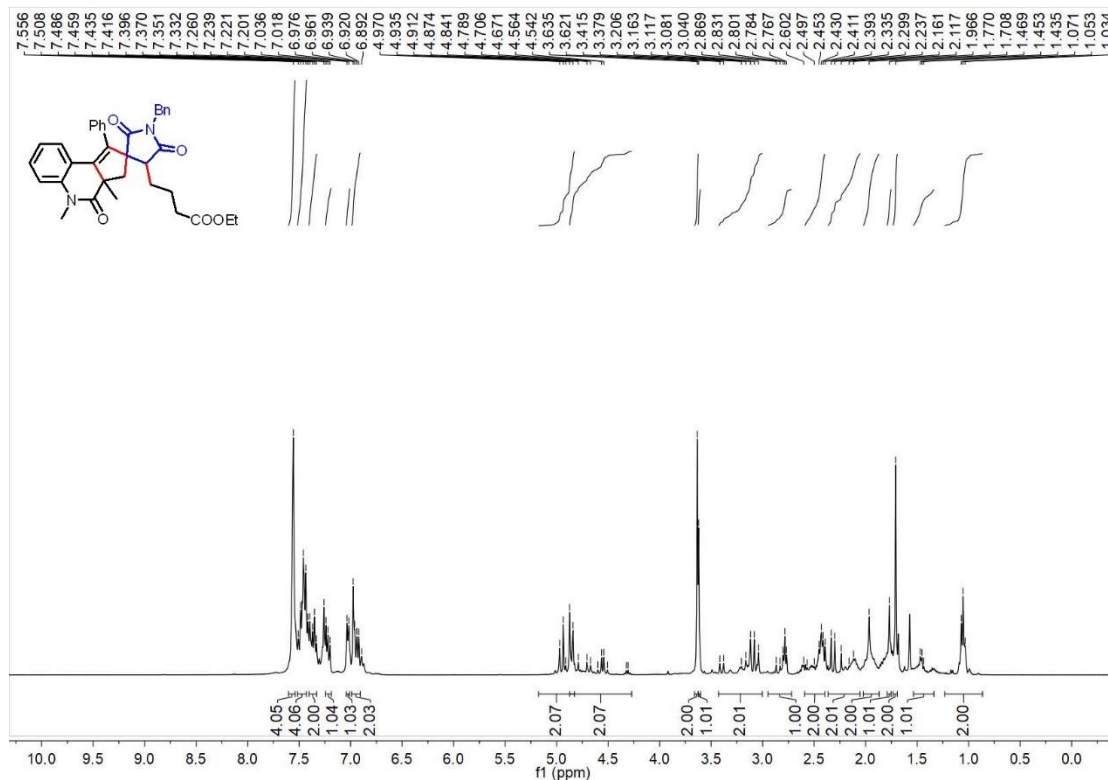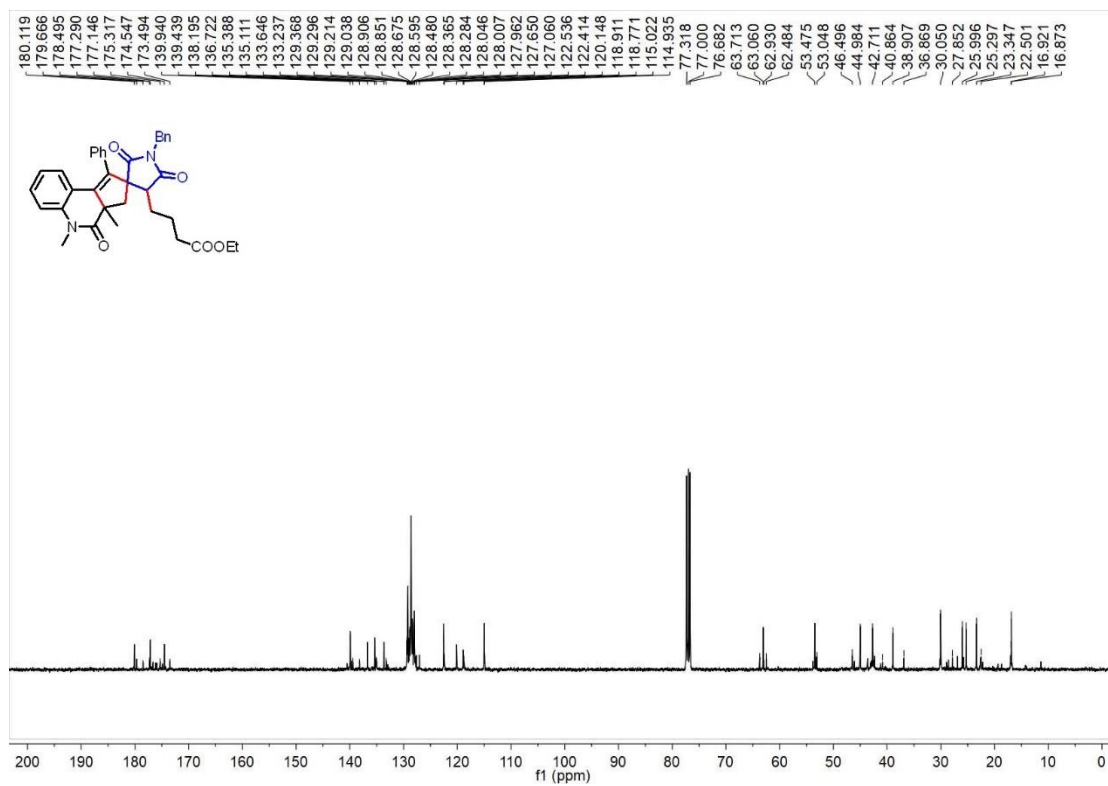

### 5-(3,5-Di-*tert*-butyl-4-oxocyclohexa-2,5-dien-1-yl)pentanenitrile (7a)

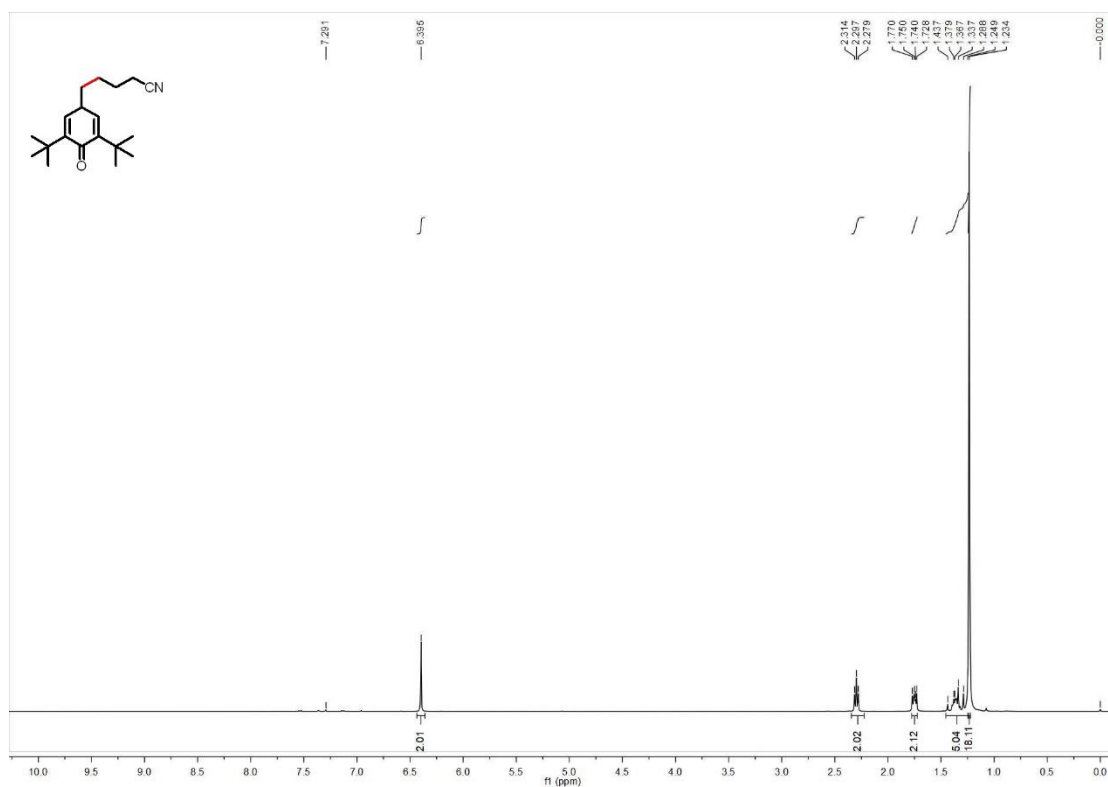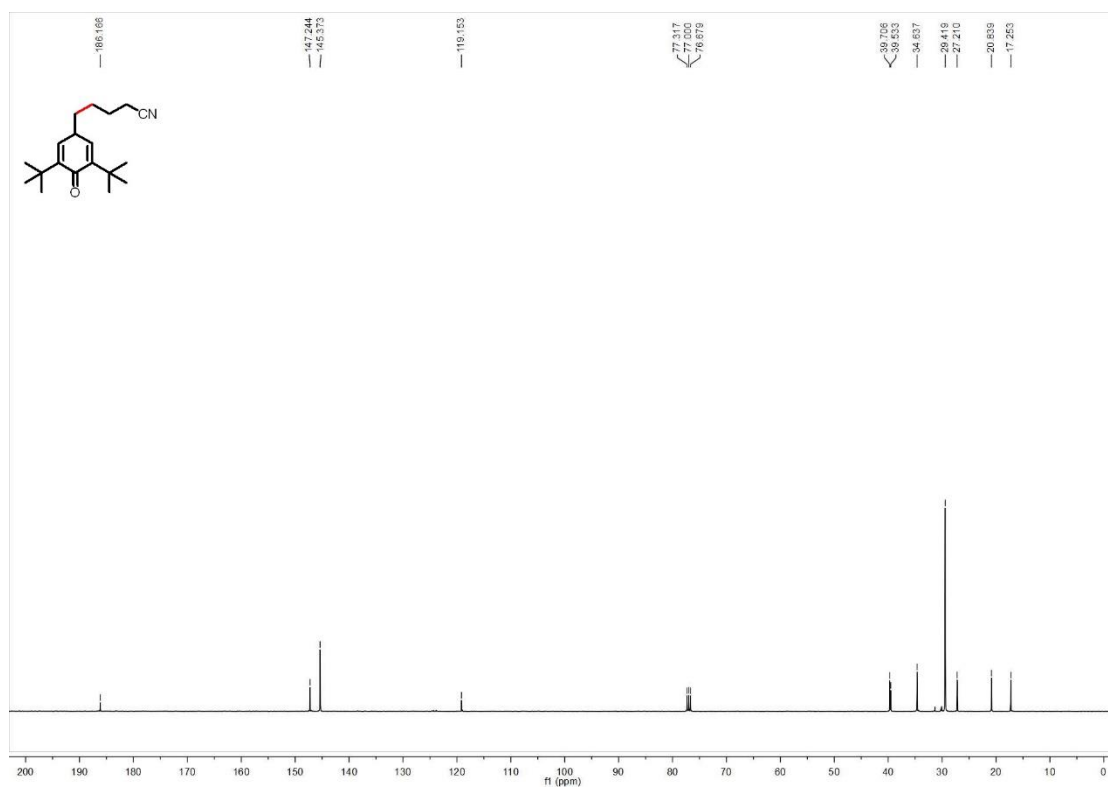



**3-(3a,5-Dimethyl-4-oxo-1-phenyl-3,3a,4,5-tetrahydro-2H-cyclopenta[c]quinolin-2-yl)propanenitrile (8a)**

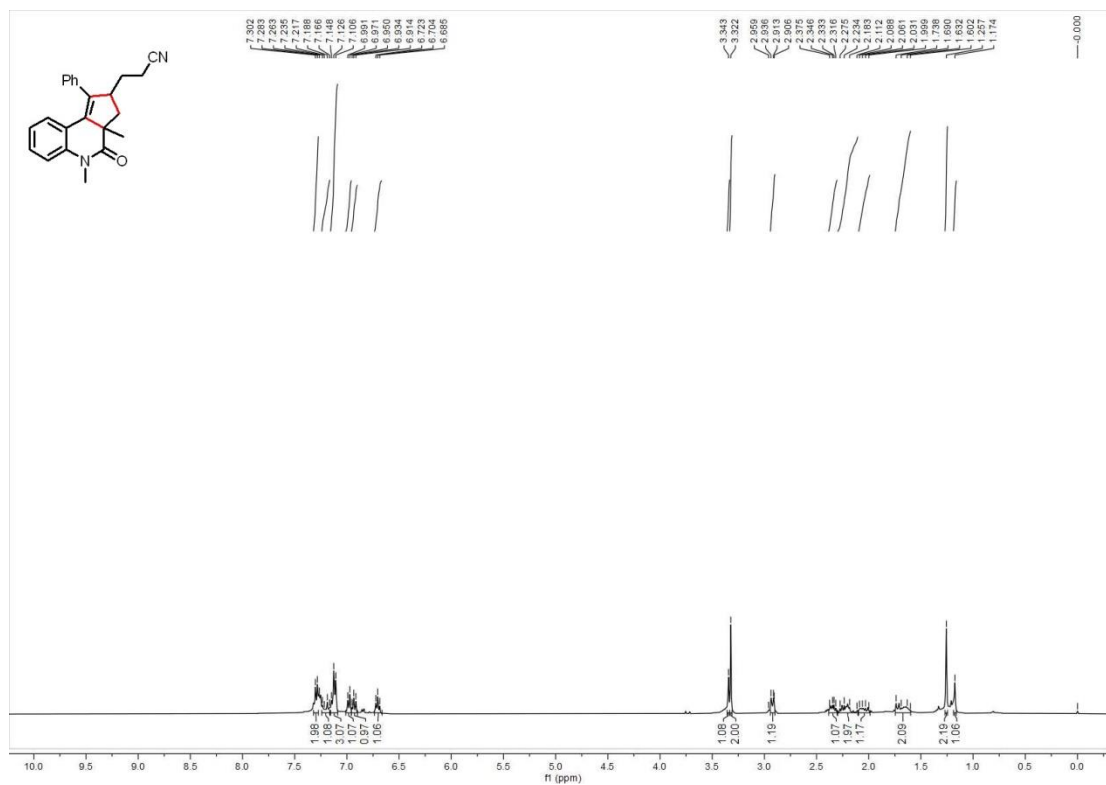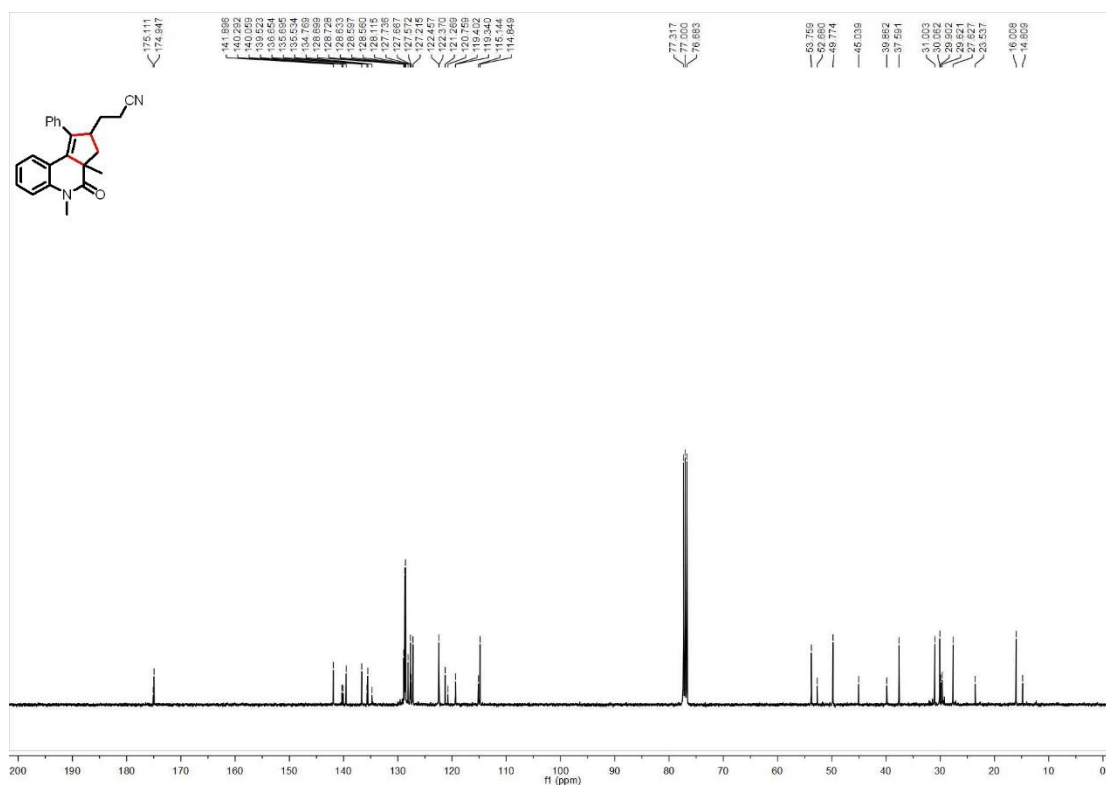

**(G) The X-ray single-crystal diffraction analysis of product 4h**

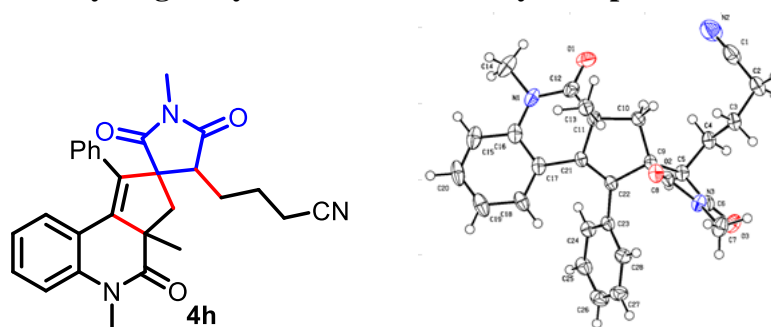

**Table 2** Crystal data and structure refinement for **4h**.

|                                                |                                                               |
|------------------------------------------------|---------------------------------------------------------------|
| Identification code                            | <b>4h</b>                                                     |
| Empirical formula                              | $C_{28}H_{27}N_3O_3$                                          |
| Formula weight                                 | 453.52                                                        |
| Temperature/K                                  | 100.0                                                         |
| Crystal system                                 | monoclinic                                                    |
| Space group                                    | $P2_1/c$                                                      |
| a/Å                                            | 8.6308(9)                                                     |
| b/Å                                            | 9.4001(9)                                                     |
| c/Å                                            | 28.739(3)                                                     |
| $\alpha/^\circ$                                | 90                                                            |
| $\beta/^\circ$                                 | 98.326(3)                                                     |
| $\gamma/^\circ$                                | 90                                                            |
| Volume/Å <sup>3</sup>                          | 2307.0(4)                                                     |
| Z                                              | 4                                                             |
| $\rho_{\text{calc}}/\text{cm}^3$               | 1.306                                                         |
| $\mu/\text{mm}^{-1}$                           | 0.086                                                         |
| F(000)                                         | 960.0                                                         |
| Crystal size/mm <sup>3</sup>                   | 0.15 × 0.08 × 0.05                                            |
| Radiation                                      | MoK $\alpha$ ( $\lambda = 0.71073$ )                          |
| 2 $\theta$ range for data collection/ $^\circ$ | 4.564 to 52.8                                                 |
| Index ranges                                   | $-10 \leq h \leq 10, -11 \leq k \leq 10, -35 \leq l \leq 35$  |
| Reflections collected                          | 16976                                                         |
| Independent reflections                        | 4654 [ $R_{\text{int}} = 0.0665, R_{\text{sigma}} = 0.0691$ ] |
| Data/restraints/parameters                     | 4654/0/310                                                    |
| Goodness-of-fit on $F^2$                       | 1.059                                                         |
| Final R indexes [ $I \geq 2\sigma(I)$ ]        | $R_1 = 0.0533, wR_2 = 0.1013$                                 |
| Final R indexes [all data]                     | $R_1 = 0.1071, wR_2 = 0.1281$                                 |
| Largest diff. peak/hole / e Å <sup>-3</sup>    | 0.20/-0.27                                                    |

**Table 3** Fractional Atomic Coordinates ( $\times 10^4$ ) and Equivalent Isotropic Displacement Parameters ( $\text{\AA}^2 \times 10^3$ ) for **4h**.

$U_{\text{eq}}$  is defined as 1/3 of the trace of the orthogonalised  $U_{ij}$  tensor.

| Atom  | x          | y          | z          | U(eq)   |
|-------|------------|------------|------------|---------|
| O(2)  | 5990.6(17) | 5722.4(17) | 5514.8(6)  | 30.7(4) |
| O(3)  | 1110.8(18) | 6661.7(19) | 5856.8(6)  | 35.8(4) |
| O(1)  | 8295.1(19) | 3687(2)    | 7316.8(6)  | 39.1(4) |
| N(3)  | 3474(2)    | 6351(2)    | 5595.1(7)  | 27.6(5) |
| N(1)  | 8297(2)    | 1564(2)    | 6935.2(7)  | 33.2(5) |
| C(22) | 4754(2)    | 3320(2)    | 6082.7(7)  | 22.2(5) |
| C(23) | 3304(2)    | 2595(2)    | 5859.7(8)  | 23.5(5) |
| C(21) | 6142(2)    | 2699(2)    | 6222.2(8)  | 22.7(5) |
| C(8)  | 4897(3)    | 5703(2)    | 5737.5(8)  | 25.4(5) |
| C(10) | 6352(2)    | 5034(2)    | 6550.0(8)  | 25.9(5) |
| C(9)  | 4821(2)    | 4912(2)    | 6200.5(8)  | 23.0(5) |
| C(11) | 7321(2)    | 3688(2)    | 6487.2(8)  | 25.3(5) |
| C(17) | 6670(3)    | 1233(2)    | 6171.8(8)  | 27.4(5) |
| C(5)  | 3287(2)    | 5502(2)    | 6355.8(8)  | 25.1(5) |
| C(6)  | 2441(3)    | 6204(2)    | 5918.9(8)  | 27.2(5) |
| C(28) | 2548(3)    | 2936(3)    | 5413.0(8)  | 28.5(5) |
| C(4)  | 3465(3)    | 6605(2)    | 6751.6(8)  | 28.3(5) |
| C(12) | 7983(3)    | 2998(3)    | 6952.8(9)  | 29.8(6) |
| C(24) | 2683(3)    | 1518(2)    | 6111.1(8)  | 28.0(5) |
| C(3)  | 4279(3)    | 7984(2)    | 6640.1(8)  | 29.1(6) |
| C(25) | 1352(3)    | 789(3)     | 5916.8(9)  | 33.0(6) |
| C(13) | 8734(3)    | 3998(3)    | 6229.0(9)  | 31.1(6) |
| C(26) | 600(3)     | 1149(3)    | 5477.6(9)  | 36.2(6) |
| C(16) | 7811(3)    | 720(3)     | 6532.0(9)  | 31.7(6) |
| C(7)  | 3070(3)    | 7082(3)    | 5146.1(9)  | 37.1(6) |
| N(2)  | 6426(3)    | 7842(3)    | 7753.3(9)  | 62.4(8) |
| C(2)  | 4571(3)    | 8996(3)    | 7061.7(8)  | 35.2(6) |
| C(18) | 6187(3)    | 383(2)     | 5782.8(9)  | 31.7(6) |
| C(27) | 1194(3)    | 2214(3)    | 5222.8(9)  | 34.2(6) |
| C(15) | 8419(3)    | -649(3)    | 6490.3(10) | 39.6(7) |
| C(20) | 7942(3)    | -1456(3)   | 6092.5(11) | 43.1(7) |
| C(1)  | 5619(4)    | 8361(3)    | 7452.5(10) | 42.3(7) |
| C(19) | 6825(3)    | -954(3)    | 5739.4(10) | 41.0(7) |
| C(14) | 9287(3)    | 928(3)     | 7340.0(10) | 48.6(8) |

**Table 4** Anisotropic Displacement Parameters ( $\text{\AA}^2 \times 10^3$ ) for **4h**.

The Anisotropic displacement factor exponent takes the form:

$$-2\pi^2[h^2a^2U_{11}+2hka*b*U_{12}+\dots].$$

| Atom  | U <sub>11</sub> | U <sub>22</sub> | U <sub>33</sub> | U <sub>23</sub> | U <sub>13</sub> | U <sub>12</sub> |
|-------|-----------------|-----------------|-----------------|-----------------|-----------------|-----------------|
| O(2)  | 29.5(9)         | 26.4(9)         | 38.4(10)        | 2.3(7)          | 12.6(8)         | 0.5(7)          |
| O(3)  | 26.1(9)         | 41.4(11)        | 40.4(10)        | 4.6(8)          | 6.0(8)          | 8.2(8)          |
| O(1)  | 29.9(9)         | 49.5(12)        | 35.7(10)        | -3.6(9)         | -3.2(8)         | -1.2(8)         |
| N(3)  | 27.0(10)        | 27.0(11)        | 29.2(11)        | 5.7(9)          | 5.7(9)          | 4.7(8)          |
| N(1)  | 26.8(11)        | 31.9(13)        | 40.3(13)        | 11.0(10)        | 3.1(9)          | 7.2(9)          |
| C(22) | 25.2(12)        | 19.2(12)        | 23.2(12)        | -0.8(9)         | 7.1(10)         | -1.7(9)         |
| C(23) | 24.3(12)        | 21.0(13)        | 26.4(13)        | -2.8(10)        | 7.3(10)         | -0.7(9)         |
| C(21) | 25.5(12)        | 18.0(12)        | 25.7(12)        | 0.2(9)          | 7.3(10)         | -0.2(9)         |
| C(8)  | 27.4(12)        | 18.4(12)        | 30.8(13)        | -1.9(10)        | 5.8(11)         | -1.2(10)        |
| C(10) | 24.7(12)        | 22.5(13)        | 30.3(13)        | -4.7(10)        | 3.6(10)         | -0.6(10)        |
| C(9)  | 22.8(11)        | 18.8(12)        | 28.1(13)        | -0.1(10)        | 6.2(10)         | 1.2(9)          |
| C(11) | 20.4(11)        | 22.5(13)        | 32.6(13)        | 0.8(10)         | 2.7(10)         | 1.0(9)          |
| C(17) | 24.9(12)        | 22.6(13)        | 37.0(14)        | 3.4(11)         | 12.6(11)        | 0.9(10)         |
| C(5)  | 23.8(12)        | 23.2(13)        | 29.5(13)        | 1.5(10)         | 8.2(10)         | 0.0(10)         |
| C(6)  | 25.4(12)        | 23.8(13)        | 33.3(14)        | -1.7(10)        | 7.1(11)         | 1.0(10)         |
| C(28) | 30.4(13)        | 29.7(14)        | 25.8(13)        | -2.3(10)        | 5.3(11)         | -2.8(11)        |
| C(4)  | 32.1(13)        | 24.5(13)        | 29.9(13)        | 0.0(10)         | 10.3(11)        | 3.2(10)         |
| C(12) | 19.3(12)        | 33.6(15)        | 36.3(15)        | 2.1(12)         | 3.9(11)         | 1.0(10)         |
| C(24) | 28.3(13)        | 27.0(14)        | 29.5(13)        | 0.0(11)         | 6.5(10)         | -0.8(10)        |
| C(3)  | 36.2(13)        | 21.4(13)        | 31.1(14)        | 0.7(10)         | 9.7(11)         | 2.2(10)         |
| C(25) | 31.5(13)        | 27.0(14)        | 42.6(16)        | -2.3(12)        | 12.5(12)        | -6.6(11)        |
| C(13) | 24.3(12)        | 28.0(14)        | 42.2(15)        | -2.2(11)        | 8.5(11)         | -1.1(10)        |
| C(26) | 27.5(13)        | 39.0(16)        | 43.0(16)        | -13.1(12)       | 8.4(12)         | -6.2(11)        |
| C(16) | 27.4(13)        | 24.5(14)        | 46.4(16)        | 4.1(12)         | 15.9(12)        | 0.5(10)         |
| C(7)  | 41.1(15)        | 37.9(16)        | 33.8(14)        | 8.8(12)         | 9.8(12)         | 8.4(12)         |
| N(2)  | 97(2)           | 46.9(17)        | 38.8(15)        | 0.1(13)         | -4.5(15)        | -1.9(15)        |
| C(2)  | 47.6(15)        | 25.4(14)        | 34.7(14)        | -4.3(11)        | 13.3(13)        | -1.0(11)        |
| C(18) | 36.9(14)        | 20.9(13)        | 41.4(15)        | -3.7(11)        | 19.9(12)        | -5.2(10)        |
| C(27) | 31.2(14)        | 43.7(16)        | 26.9(13)        | -8.3(12)        | 1.7(11)         | 1.2(12)         |
| C(15) | 28.4(13)        | 30.0(15)        | 64.6(19)        | 14.3(14)        | 20.4(13)        | 5.3(11)         |
| C(20) | 41.9(16)        | 18.3(14)        | 77(2)           | 3.0(14)         | 34.9(16)        | 0.8(12)         |
| C(1)  | 64.4(19)        | 30.7(16)        | 32.9(15)        | -6.1(13)        | 10.4(15)        | -2.1(14)        |
| C(19) | 47.0(16)        | 24.5(15)        | 59.0(19)        | -6.9(13)        | 32.6(15)        | -5.6(12)        |
| C(14) | 37.0(15)        | 56(2)           | 51.4(18)        | 21.0(15)        | 1.8(14)         | 14.1(14)        |

**Table 5** Bond Lengths for **4h**.

| <b>Atom</b> | <b>Atom</b> | <b>Length/Å</b> | <b>Atom</b> | <b>Atom</b> | <b>Length/Å</b> |
|-------------|-------------|-----------------|-------------|-------------|-----------------|
| O(2)        | C(8)        | 1.215(2)        | C(9)        | C(5)        | 1.558(3)        |
| O(3)        | C(6)        | 1.214(3)        | C(11)       | C(12)       | 1.522(3)        |
| O(1)        | C(12)       | 1.227(3)        | C(11)       | C(13)       | 1.544(3)        |
| N(3)        | C(8)        | 1.379(3)        | C(17)       | C(16)       | 1.407(3)        |
| N(3)        | C(6)        | 1.386(3)        | C(17)       | C(18)       | 1.388(3)        |
| N(3)        | C(7)        | 1.459(3)        | C(5)        | C(6)        | 1.510(3)        |
| N(1)        | C(12)       | 1.378(3)        | C(5)        | C(4)        | 1.531(3)        |
| N(1)        | C(16)       | 1.417(3)        | C(28)       | C(27)       | 1.393(3)        |
| N(1)        | C(14)       | 1.467(3)        | C(4)        | C(3)        | 1.531(3)        |
| C(22)       | C(23)       | 1.485(3)        | C(24)       | C(25)       | 1.385(3)        |
| C(22)       | C(21)       | 1.341(3)        | C(3)        | C(2)        | 1.532(3)        |
| C(22)       | C(9)        | 1.534(3)        | C(25)       | C(26)       | 1.376(3)        |
| C(23)       | C(28)       | 1.391(3)        | C(26)       | C(27)       | 1.382(3)        |
| C(23)       | C(24)       | 1.395(3)        | C(16)       | C(15)       | 1.401(3)        |
| C(21)       | C(11)       | 1.502(3)        | N(2)        | C(1)        | 1.138(4)        |
| C(21)       | C(17)       | 1.465(3)        | C(2)        | C(1)        | 1.463(4)        |
| C(8)        | C(9)        | 1.534(3)        | C(18)       | C(19)       | 1.385(3)        |
| C(10)       | C(9)        | 1.544(3)        | C(15)       | C(20)       | 1.384(4)        |
| C(10)       | C(11)       | 1.541(3)        | C(20)       | C(19)       | 1.378(4)        |

**Table 6** Bond Angles for **4h**.

| Atom  | Atom  | Atom  | Angle/°    | Atom  | Atom  | Atom  | Angle/°    |
|-------|-------|-------|------------|-------|-------|-------|------------|
| C(8)  | N(3)  | C(6)  | 112.89(19) | C(12) | C(11) | C(13) | 106.29(18) |
| C(8)  | N(3)  | C(7)  | 123.99(19) | C(16) | C(17) | C(21) | 116.4(2)   |
| C(6)  | N(3)  | C(7)  | 123.10(19) | C(18) | C(17) | C(21) | 124.0(2)   |
| C(12) | N(1)  | C(16) | 122.8(2)   | C(18) | C(17) | C(16) | 119.5(2)   |
| C(12) | N(1)  | C(14) | 117.7(2)   | C(6)  | C(5)  | C(9)  | 104.25(17) |
| C(16) | N(1)  | C(14) | 119.3(2)   | C(6)  | C(5)  | C(4)  | 107.80(19) |
| C(23) | C(22) | C(9)  | 123.02(19) | C(4)  | C(5)  | C(9)  | 117.12(18) |
| C(21) | C(22) | C(23) | 126.2(2)   | O(3)  | C(6)  | N(3)  | 123.5(2)   |
| C(21) | C(22) | C(9)  | 110.80(19) | O(3)  | C(6)  | C(5)  | 127.6(2)   |
| C(28) | C(23) | C(22) | 123.1(2)   | N(3)  | C(6)  | C(5)  | 108.71(18) |
| C(28) | C(23) | C(24) | 118.7(2)   | C(23) | C(28) | C(27) | 120.3(2)   |
| C(24) | C(23) | C(22) | 118.2(2)   | C(5)  | C(4)  | C(3)  | 114.72(18) |
| C(22) | C(21) | C(11) | 113.1(2)   | O(1)  | C(12) | N(1)  | 121.9(2)   |
| C(22) | C(21) | C(17) | 131.1(2)   | O(1)  | C(12) | C(11) | 122.2(2)   |
| C(17) | C(21) | C(11) | 115.78(19) | N(1)  | C(12) | C(11) | 115.8(2)   |
| O(2)  | C(8)  | N(3)  | 124.3(2)   | C(25) | C(24) | C(23) | 120.6(2)   |
| O(2)  | C(8)  | C(9)  | 126.8(2)   | C(4)  | C(3)  | C(2)  | 112.83(19) |
| N(3)  | C(8)  | C(9)  | 108.85(18) | C(26) | C(25) | C(24) | 120.1(2)   |
| C(11) | C(10) | C(9)  | 106.89(18) | C(25) | C(26) | C(27) | 120.2(2)   |
| C(22) | C(9)  | C(8)  | 106.64(18) | C(17) | C(16) | N(1)  | 120.2(2)   |
| C(22) | C(9)  | C(10) | 102.56(17) | C(15) | C(16) | N(1)  | 120.9(2)   |
| C(22) | C(9)  | C(5)  | 113.82(17) | C(15) | C(16) | C(17) | 118.9(2)   |
| C(8)  | C(9)  | C(10) | 112.81(18) | C(1)  | C(2)  | C(3)  | 111.5(2)   |
| C(8)  | C(9)  | C(5)  | 102.78(17) | C(19) | C(18) | C(17) | 121.2(3)   |
| C(10) | C(9)  | C(5)  | 118.02(18) | C(26) | C(27) | C(28) | 120.0(2)   |
| C(21) | C(11) | C(10) | 103.21(17) | C(20) | C(15) | C(16) | 120.2(3)   |
| C(21) | C(11) | C(12) | 108.83(19) | C(19) | C(20) | C(15) | 120.9(2)   |
| C(21) | C(11) | C(13) | 113.40(18) | N(2)  | C(1)  | C(2)  | 178.7(3)   |
| C(10) | C(11) | C(13) | 112.40(18) | C(20) | C(19) | C(18) | 119.3(3)   |
| C(12) | C(11) | C(10) | 112.83(19) |       |       |       |            |

**Table 7** Hydrogen Atom Coordinates ( $\text{\AA}\times 10^4$ ) and Isotropic Displacement Parameters ( $\text{\AA}^2\times 10^3$ ) for **4h**.

| <b>Atom</b> | <b>x</b> | <b>y</b> | <b>z</b> | <b>U(eq)</b> |
|-------------|----------|----------|----------|--------------|
| H(10A)      | 6939.27  | 5896.58  | 6482.51  | 31           |
| H(10B)      | 6117.63  | 5095.59  | 6876.54  | 31           |
| H(5)        | 2643.89  | 4688.01  | 6444.91  | 30           |
| H(28)       | 2957.23  | 3664.36  | 5236.65  | 34           |
| H(4A)       | 4067.93  | 6172     | 7035.78  | 34           |
| H(4B)       | 2411.95  | 6842.25  | 6826.92  | 34           |
| H(24)       | 3178.18  | 1283.45  | 6418.49  | 34           |
| H(3A)       | 3624.8   | 8474.63  | 6376.81  | 35           |
| H(3B)       | 5293.6   | 7748.45  | 6536.31  | 35           |
| H(25)       | 956.51   | 37.56    | 6087.1   | 40           |
| H(13A)      | 9251.97  | 3101.45  | 6169.96  | 47           |
| H(13B)      | 9475.75  | 4617.63  | 6424.08  | 47           |
| H(13C)      | 8369.89  | 4469.91  | 5929.04  | 47           |
| H(26)       | -330.57  | 665.19   | 5349.05  | 43           |
| H(7A)       | 2885.87  | 8092.07  | 5202.72  | 56           |
| H(7B)       | 2120.03  | 6659.14  | 4972.89  | 56           |
| H(7C)       | 3933.56  | 6986.63  | 4961.19  | 56           |
| H(2A)       | 5039.37  | 9889.92  | 6964.6   | 42           |
| H(2B)       | 3560.17  | 9233.51  | 7167.22  | 42           |
| H(18)       | 5403.79  | 724.5    | 5542.1   | 38           |
| H(27)       | 679.4    | 2452.99  | 4917.97  | 41           |
| H(15)       | 9162.4   | -1024.01 | 6735.81  | 48           |
| H(20)       | 8389.8   | -2368.35 | 6062.58  | 52           |
| H(19)       | 6496.66  | -1518.75 | 5468.97  | 49           |
| H(14A)      | 10303.15 | 669.58   | 7250.49  | 73           |
| H(14B)      | 8775.54  | 73.96    | 7441.11  | 73           |
| H(14C)      | 9442.16  | 1615.57  | 7598.9   | 73           |
